# Supplementary material for: Plasma-assisted destruction of polystyrene nanoplastics
Source: Royal Society of Chemistry journal article supplement (doi:10.1039/d4nr02498b), 2024-12-10
Supplement: d4nr02498b2.pdf [file d4nr02498b2.pdf]

Tables of supporting data for Figure 2c

| Plasma treatment time (min) | Concentration of particles in plasma-treated solution (particles/mL) |          |
|-----------------------------|----------------------------------------------------------------------|----------|
|                             | Average                                                              | $\sigma$ |
| 0                           | 9.60E+09                                                             | 4.98E+07 |
| 15                          | 2.63E+09                                                             | 4.07E+08 |
| 30                          | 1.73E+09                                                             | 3.72E+08 |
| 45                          | 9.17E+07                                                             | 8.93E+06 |
| 60                          | 3.56E+07                                                             | 1.27E+07 |
| 120                         | 3.82E+07                                                             | 2.88E+07 |
| 180                         | 5.47E+06                                                             | 3.96E+06 |

| Concentration of particles in DI water (particles/mL) |          |
|-------------------------------------------------------|----------|
| Average                                               | $\sigma$ |
| 8.24E+07                                              | 1.13E+07 |

Tables of supporting data for Figure 2d

| Size (nm) | Concentration (particles/mL) at different plasma treatment time |         |         |         |         |          |          |
|-----------|-----------------------------------------------------------------|---------|---------|---------|---------|----------|----------|
|           | 0 min.                                                          | 15 min. | 30 min. | 45 min. | 60 min. | 120 min. | 180 min. |
| 0.5       | 0                                                               | 0       | 0       | 0       | 0       | 0        | 0        |
| 1.5       | 0                                                               | 0       | 0       | 0       | 0       | 0        | 0        |
| 2.5       | 0                                                               | 0       | 0       | 0       | 0       | 0        | 0        |
| 3.5       | 0                                                               | 0       | 0       | 0       | 0       | 0        | 0        |
| 4.5       | 0                                                               | 0       | 0       | 0       | 0       | 0        | 0        |
| 5.5       | 0                                                               | 0       | 0       | 0       | 0       | 0        | 0        |
| 6.5       | 0                                                               | 0       | 0       | 0       | 0       | 0        | 0        |
| 7.5       | 0                                                               | 0       | 0       | 0       | 0       | 0        | 0        |
| 8.5       | 0                                                               | 0       | 0       | 131     | 0       | 0        | 0        |
| 9.5       | 0                                                               | 0       | 0       | 5116    | 287     | 0        | 0        |
| 10.5      | 0                                                               | 0       | 0       | 37046   | 5527    | 0        | 0        |
| 11.5      | 0                                                               | 0       | 0       | 69331   | 18364   | 0        | 0        |
| 12.5      | 0                                                               | 0       | 0       | 46271   | 25283   | 0        | 0        |
| 13.5      | 0                                                               | 0       | 0       | 15079   | 27235   | 0        | 0        |
| 14.5      | 0                                                               | 0       | 0       | 3261    | 33192   | 0        | 0        |
| 15.5      | 0                                                               | 0       | 0       | 626     | 51400   | 0        | 0        |
| 16.5      | 0                                                               | 0       | 0       | 179     | 94373   | 0        | 0        |
| 17.5      | 0                                                               | 0       | 0       | 5723    | 175466  | 0        | 5        |
| 18.5      | 0                                                               | 0       | 0       | 138381  | 282278  | 0        | 90       |
| 19.5      | 0                                                               | 0       | 0       | 572923  | 355094  | 0        | 1579     |
| 20.5      | 0                                                               | 0       | 0       | 460616  | 340234  | 0        | 22632    |
| 21.5      | 0                                                               | 0       | 0       | 95204   | 258400  | 0        | 203219   |
| 22.5      | 0                                                               | 0       | 0       | 11480   | 168957  | 1        | 934940   |
| 23.5      | 0                                                               | 0       | 0       | 11750   | 104943  | 2        | 1973420  |
| 24.5      | 0                                                               | 0       | 0       | 19815   | 67833   | 6        | 1879970  |
| 25.5      | 0                                                               | 0       | 0       | 29363   | 48866   | 16       | 863210   |
| 26.5      | 0                                                               | 0       | 0       | 44790   | 40720   | 37       | 217160   |
| 27.5      | 0                                                               | 0       | 20      | 75417   | 39409   | 81       | 35400    |
| 28.5      | 0                                                               | 10      | 50      | 136789  | 43371   | 166      | 4496     |
| 29.5      | 0                                                               | 140     | 90      | 247030  | 52727   | 323      | 532      |
| 30.5      | 0                                                               | 1310    | 140     | 403563  | 69498   | 599      | 69       |
| 31.5      | 0                                                               | 8690    | 180     | 550455  | 99297   | 1068     | 11       |
| 32.5      | 0                                                               | 41450   | 200     | 605478  | 154021  | 1842     | 2        |
| 33.5      | 0                                                               | 146330  | 200     | 554089  | 252167  | 3084     | 0        |
| 34.5      | 0                                                               | 394320  | 190     | 461705  | 411098  | 5016     | 0        |
| 35.5      | 0                                                               | 839940  | 170     | 380890  | 630274  | 7893     | 0        |
| 36.5      | 0                                                               | 1476640 | 160     | 327628  | 876281  | 11959    | 0        |
| 37.5      | 0                                                               | 2261590 | 140     | 407976  | 1086460 | 17341    | 0        |
| 38.5      | 10                                                              | 3200830 | 150     | 917269  | 1195760 | 23944    | 0        |
| 39.5      | 20                                                              | 4372950 | 300     | 1646470 | 1170030 | 31369    | 0        |

|      |         |          |          |         |         |        |       |
|------|---------|----------|----------|---------|---------|--------|-------|
| 40.5 | 50      | 5839990  | 1380     | 1540110 | 1022000 | 38924  | 0     |
| 41.5 | 80      | 7565720  | 7340     | 777468  | 800776  | 45756  | 0     |
| 42.5 | 150     | 9440670  | 33490    | 317632  | 565788  | 51059  | 0     |
| 43.5 | 250     | 11344100 | 125060   | 208058  | 363048  | 54281  | 1     |
| 44.5 | 420     | 13150900 | 383600   | 204731  | 214386  | 55252  | 2     |
| 45.5 | 690     | 14704800 | 978110   | 218785  | 119791  | 54178  | 3     |
| 46.5 | 1080    | 15826200 | 2103720  | 235551  | 66878   | 51533  | 5     |
| 47.5 | 1660    | 16363400 | 3877770  | 253007  | 40575   | 47904  | 9     |
| 48.5 | 2480    | 16248600 | 6230280  | 270392  | 28884   | 43853  | 16    |
| 49.5 | 3630    | 15520700 | 8880950  | 288020  | 24307   | 39828  | 26    |
| 50.5 | 5200    | 14307500 | 11439200 | 308377  | 22890   | 36138  | 44    |
| 51.5 | 7310    | 12782900 | 13565500 | 335501  | 22775   | 32967  | 72    |
| 52.5 | 10070   | 11122400 | 15091900 | 371194  | 23167   | 30407  | 115   |
| 53.5 | 13630   | 9473450  | 16042900 | 411555  | 23753   | 28500  | 180   |
| 54.5 | 18160   | 7944780  | 16565500 | 450891  | 24428   | 27268  | 276   |
| 55.5 | 23840   | 6608110  | 16816200 | 489883  | 25173   | 26731  | 413   |
| 56.5 | 30880   | 5506030  | 16866500 | 528799  | 26004   | 26929  | 604   |
| 57.5 | 39570   | 4659580  | 16689900 | 545347  | 26948   | 27918  | 862   |
| 58.5 | 50280   | 4074710  | 16246000 | 501540  | 28034   | 29777  | 1202  |
| 59.5 | 63520   | 3747890  | 15589100 | 394306  | 29288   | 32606  | 1637  |
| 60.5 | 80040   | 3671250  | 14891000 | 280838  | 30733   | 36515  | 2182  |
| 61.5 | 100880  | 3836230  | 14351900 | 248194  | 32384   | 41623  | 2851  |
| 62.5 | 127460  | 4233830  | 14084400 | 384099  | 34245   | 48043  | 3655  |
| 63.5 | 161580  | 4849580  | 14065400 | 734857  | 36309   | 55865  | 4607  |
| 64.5 | 205480  | 5652430  | 14164900 | 1179180 | 38555   | 65148  | 5722  |
| 65.5 | 261690  | 6580330  | 14206200 | 1386620 | 40943   | 75895  | 7012  |
| 66.5 | 332910  | 7530090  | 14018500 | 1139310 | 43418   | 88044  | 8495  |
| 67.5 | 421800  | 8362490  | 13476900 | 645119  | 45904   | 101455 | 10187 |
| 68.5 | 530730  | 8930130  | 12534300 | 259618  | 48313   | 115903 | 12109 |
| 69.5 | 661630  | 9122910  | 11239600 | 86892   | 50550   | 131082 | 14278 |
| 70.5 | 815780  | 8910900  | 9728780  | 37139   | 52519   | 146614 | 16711 |
| 71.5 | 993830  | 8360630  | 8186300  | 27110   | 54140   | 162071 | 19417 |
| 72.5 | 1195820 | 7614580  | 6787270  | 26142   | 55353   | 176990 | 22394 |
| 73.5 | 1421340 | 6846450  | 5647610  | 28299   | 56131   | 190910 | 25617 |
| 74.5 | 1669730 | 6216680  | 4802800  | 34947   | 56482   | 203394 | 29040 |
| 75.5 | 1940240 | 5846170  | 4219180  | 51595   | 56454   | 214057 | 32577 |
| 76.5 | 2232190 | 5809270  | 3824760  | 88403   | 56125   | 222588 | 36102 |
| 77.5 | 2544970 | 6134620  | 3541340  | 157059  | 55598   | 228765 | 39445 |
| 78.5 | 2878050 | 6801870  | 3305750  | 259683  | 54987   | 232469 | 42394 |
| 79.5 | 3230830 | 7731480  | 3077830  | 376372  | 54410   | 233683 | 44706 |
| 80.5 | 3602420 | 8776980  | 2838840  | 469404  | 53979   | 232491 | 46134 |
| 81.5 | 3991500 | 9735690  | 2585450  | 508968  | 53791   | 229067 | 46454 |
| 82.5 | 4396180 | 10388500 | 2323350  | 495619  | 53924   | 223660 | 45509 |
| 83.5 | 4813830 | 10561200 | 2062120  | 455390  | 54433   | 216574 | 43246 |

|       |          |          |         |        |        |        |       |
|-------|----------|----------|---------|--------|--------|--------|-------|
| 84.5  | 5241190  | 10181800 | 1811920 | 416714 | 55345  | 208146 | 39741 |
| 85.5  | 5674390  | 9301490  | 1581840 | 393924 | 56658  | 198721 | 35212 |
| 86.5  | 6109110  | 8069430  | 1379360 | 386521 | 58330  | 188640 | 29992 |
| 87.5  | 6540830  | 6675490  | 1210750 | 386926 | 60286  | 178212 | 24486 |
| 88.5  | 6965000  | 5292570  | 1081650 | 387873 | 62439  | 167710 | 19109 |
| 89.5  | 7377250  | 4042170  | 997870  | 385679 | 64798  | 157360 | 14217 |
| 90.5  | 7773540  | 2987780  | 965600  | 379622 | 67790  | 147341 | 10062 |
| 91.5  | 8150300  | 2146400  | 990900  | 369588 | 73044  | 137784 | 6768  |
| 92.5  | 8504510  | 1505450  | 1077970 | 354583 | 84839  | 128774 | 4347  |
| 93.5  | 8833700  | 1037420  | 1226390 | 333331 | 111931 | 120364 | 2734  |
| 94.5  | 9135940  | 709900   | 1428030 | 306026 | 168099 | 112571 | 1849  |
| 95.5  | 9409870  | 491660   | 1665160 | 275482 | 268364 | 105393 | 1651  |
| 96.5  | 9654600  | 355920   | 1911610 | 246942 | 418794 | 98808  | 2178  |
| 97.5  | 9869690  | 281730   | 2137940 | 227084 | 603398 | 92781  | 3554  |
| 98.5  | 10055100 | 254200   | 2319830 | 222716 | 778887 | 87274  | 5950  |
| 99.5  | 10211100 | 263870   | 2446450 | 238578 | 887911 | 82242  | 9493  |
| 100.5 | 10338400 | 305760   | 2524740 | 273678 | 888008 | 77638  | 14152 |
| 101.5 | 10437700 | 378270   | 2576280 | 318042 | 776970 | 73420  | 19639 |
| 102.5 | 10510200 | 482040   | 2627150 | 354275 | 594297 | 69545  | 25378 |
| 103.5 | 10557200 | 618910   | 2694890 | 365891 | 397613 | 65974  | 30578 |
| 104.5 | 10580100 | 790850   | 2778720 | 347220 | 233091 | 62672  | 34407 |
| 105.5 | 10580500 | 999040   | 2857860 | 306239 | 120105 | 59607  | 36214 |
| 106.5 | 10560200 | 1242990  | 2899280 | 257999 | 54694  | 56751  | 35712 |
| 107.5 | 10520900 | 1519820  | 2870980 | 215202 | 22230  | 54082  | 33050 |
| 108.5 | 10464800 | 1823900  | 2755010 | 183518 | 8221   | 51577  | 28751 |
| 109.5 | 10393700 | 2146710  | 2554480 | 162835 | 2879   | 49219  | 23548 |
| 110.5 | 10309900 | 2477210  | 2292410 | 150747 | 1041   | 46993  | 18189 |
| 111.5 | 10215400 | 2802570  | 2003910 | 144980 | 464    | 44889  | 13272 |
| 112.5 | 10112500 | 3109210  | 1725690 | 144078 | 328    | 42895  | 9163  |
| 113.5 | 10003500 | 3384080  | 1487150 | 147191 | 395    | 41005  | 5997  |
| 114.5 | 9890440  | 3615950  | 1305440 | 153704 | 642    | 39211  | 3726  |
| 115.5 | 9775620  | 3796480  | 1184950 | 163026 | 1140   | 37508  | 2202  |
| 116.5 | 9661140  | 3921050  | 1119860 | 174537 | 2030   | 35892  | 1240  |
| 117.5 | 9549090  | 3989170  | 1098010 | 187664 | 3520   | 34359  | 667   |
| 118.5 | 9441430  | 4004460  | 1104580 | 202031 | 5885   | 32907  | 343   |
| 119.5 | 9340060  | 3974310  | 1124910 | 217617 | 9464   | 31532  | 169   |
| 120.5 | 9246760  | 3909210  | 1146160 | 234882 | 14625  | 30232  | 80    |
| 121.5 | 9163200  | 3821920  | 1158260 | 254771 | 21720  | 29004  | 36    |
| 122.5 | 9090940  | 3726350  | 1154270 | 278573 | 31006  | 27846  | 16    |
| 123.5 | 9031430  | 3636470  | 1130360 | 307617 | 42552  | 26756  | 7     |
| 124.5 | 8986010  | 3564860  | 1085640 | 342834 | 56153  | 25729  | 3     |
| 125.5 | 8955950  | 3521380  | 1021780 | 384259 | 71265  | 24766  | 1     |
| 126.5 | 8942460  | 3511770  | 942390  | 430581 | 86990  | 23864  | 0     |
| 127.5 | 8946660  | 3536690  | 852370  | 478913 | 102135 | 23023  | 0     |

|       |          |          |         |         |        |        |   |
|-------|----------|----------|---------|---------|--------|--------|---|
| 128.5 | 8969660  | 3591440  | 757160  | 524970  | 115348 | 22243  | 0 |
| 129.5 | 9012570  | 3666550  | 662000  | 563771  | 125306 | 21527  | 0 |
| 130.5 | 9076480  | 3749580  | 571460  | 590817  | 130939 | 20881  | 0 |
| 131.5 | 9162520  | 3827600  | 489120  | 603419  | 131623 | 20312  | 0 |
| 132.5 | 9271870  | 3890170  | 417440  | 601721  | 127302 | 19834  | 0 |
| 133.5 | 9405780  | 3932010  | 357900  | 588931  | 118514 | 19467  | 0 |
| 134.5 | 9565550  | 3954790  | 311190  | 570602  | 106299 | 19236  | 0 |
| 135.5 | 9752620  | 3967530  | 277510  | 553174  | 92017  | 19178  | 0 |
| 136.5 | 9968490  | 3985560  | 256830  | 542304  | 77136  | 19342  | 0 |
| 137.5 | 10214800 | 4028100  | 249110  | 541565  | 63010  | 19790  | 0 |
| 138.5 | 10493200 | 4114980  | 254440  | 551857  | 50718  | 20602  | 0 |
| 139.5 | 10805600 | 4263080  | 273020  | 571579  | 40980  | 21879  | 0 |
| 140.5 | 11153800 | 4483240  | 305170  | 597349  | 34142  | 23743  | 0 |
| 141.5 | 11539800 | 4778210  | 351100  | 624963  | 30225  | 26340  | 0 |
| 142.5 | 11965600 | 5142080  | 410820  | 650308  | 29003  | 29838  | 0 |
| 143.5 | 12433300 | 5561340  | 484020  | 670054  | 30087  | 34424  | 0 |
| 144.5 | 12944900 | 6017190  | 570080  | 682044  | 32996  | 40298  | 0 |
| 145.5 | 13502200 | 6488690  | 668320  | 685388  | 37209  | 47660  | 0 |
| 146.5 | 14107200 | 6955950  | 778500  | 680318  | 42200  | 56694  | 0 |
| 147.5 | 14761300 | 7402800  | 901380  | 667894  | 47458  | 67549  | 0 |
| 148.5 | 15466200 | 7818470  | 1039440 | 649653  | 52510  | 80305  | 0 |
| 149.5 | 16222700 | 8198070  | 1197300 | 627276  | 56932  | 94956  | 0 |
| 150.5 | 17031500 | 8542010  | 1381750 | 602337  | 60379  | 111372 | 0 |
| 151.5 | 17892700 | 8854540  | 1601180 | 576144  | 62607  | 129282 | 0 |
| 152.5 | 18805800 | 9141700  | 1864380 | 549678  | 63534  | 148259 | 0 |
| 153.5 | 19769600 | 9409120  | 2178760 | 523606  | 63375  | 167719 | 0 |
| 154.5 | 20781900 | 9659840  | 2548350 | 498345  | 62996  | 186938 | 0 |
| 155.5 | 21840000 | 9892430  | 2971820 | 474132  | 64655  | 205091 | 0 |
| 156.5 | 22939900 | 10099800 | 3441220 | 451113  | 73114  | 221303 | 0 |
| 157.5 | 24077000 | 10268700 | 3941520 | 429398  | 96423  | 234717 | 0 |
| 158.5 | 25245800 | 10380500 | 4451620 | 409118  | 144598 | 244572 | 0 |
| 159.5 | 26440100 | 10412500 | 4946640 | 390481  | 224370 | 250271 | 0 |
| 160.5 | 27653300 | 10341600 | 5401460 | 373885  | 330861 | 251447 | 0 |
| 161.5 | 28878800 | 10147400 | 5794860 | 360160  | 442018 | 248000 | 0 |
| 162.5 | 30110100 | 9816820  | 6113610 | 351040  | 523401 | 240109 | 0 |
| 163.5 | 31341000 | 9347940  | 6355490 | 349882  | 544455 | 228225 | 0 |
| 164.5 | 32566600 | 8752140  | 6530510 | 362446  | 496154 | 213019 | 0 |
| 165.5 | 33783000 | 8054680  | 6659800 | 397091  | 396247 | 195330 | 0 |
| 166.5 | 34987900 | 7292540  | 6772170 | 463424  | 278013 | 176082 | 0 |
| 167.5 | 36180400 | 6510200  | 6898580 | 568628  | 172111 | 156213 | 0 |
| 168.5 | 37361800 | 5753860  | 7065750 | 712012  | 94697  | 136604 | 0 |
| 169.5 | 38534500 | 5065500  | 7289910 | 880288  | 46920  | 118028 | 0 |
| 170.5 | 39702600 | 4478040  | 7571990 | 1047260 | 21525  | 101115 | 0 |
| 171.5 | 40871500 | 4012330  | 7895620 | 1180250 | 9754   | 86348  | 0 |

|       |           |         |         |         |        |        |        |
|-------|-----------|---------|---------|---------|--------|--------|--------|
| 172.5 | 42047100  | 3676500 | 8228390 | 1251550 | 5001   | 74071  | 0      |
| 173.5 | 43236000  | 3467320 | 8526480 | 1249500 | 3429   | 64516  | 0      |
| 174.5 | 44444600  | 3372870 | 8741980 | 1182890 | 3205   | 57840  | 0      |
| 175.5 | 45679100  | 3375750 | 8831350 | 1076480 | 3588   | 54152  | 0      |
| 176.5 | 46944900  | 3456000 | 8763250 | 960179  | 4323   | 53536  | 0      |
| 177.5 | 48246400  | 3593390 | 8524060 | 858127  | 5346   | 56045  | 0      |
| 178.5 | 49586800  | 3768880 | 8119850 | 782187  | 6662   | 61685  | 0      |
| 179.5 | 50968100  | 3965360 | 7574720 | 731605  | 8301   | 70363  | 0      |
| 180.5 | 52390900  | 4167940 | 6926010 | 697066  | 10305  | 81829  | 0      |
| 181.5 | 53854400  | 4363900 | 6217860 | 666290  | 12727  | 95623  | 0      |
| 182.5 | 55356600  | 4542600 | 5494660 | 628804  | 15627  | 111046 | 0      |
| 183.5 | 56894300  | 4695410 | 4795710 | 578735  | 19078  | 127170 | 2      |
| 184.5 | 58463500  | 4815600 | 4151790 | 515469  | 23170  | 142900 | 5      |
| 185.5 | 60059100  | 4898310 | 3583930 | 442670  | 28037  | 157085 | 10     |
| 186.5 | 61675700  | 4940550 | 3103990 | 366370  | 33892  | 168663 | 22     |
| 187.5 | 63307400  | 4941090 | 2716370 | 292899  | 41130  | 176805 | 44     |
| 188.5 | 64948000  | 4900370 | 2420180 | 227288  | 50491  | 181035 | 86     |
| 189.5 | 66591400  | 4820340 | 2211410 | 172450  | 63311  | 181286 | 163    |
| 190.5 | 68231800  | 4704180 | 2084540 | 129151  | 81815  | 177897 | 301    |
| 191.5 | 69863700  | 4556080 | 2033660 | 96523   | 109241 | 171530 | 540    |
| 192.5 | 71482100  | 4380950 | 2052990 | 72776   | 149432 | 163051 | 937    |
| 193.5 | 73082900  | 4184090 | 2136930 | 55844   | 205464 | 153384 | 1576   |
| 194.5 | 74662400  | 3970980 | 2279940 | 43827   | 277211 | 143381 | 2571   |
| 195.5 | 76218100  | 3746970 | 2476320 | 35199   | 358661 | 133723 | 4065   |
| 196.5 | 77748000  | 3517140 | 2720090 | 28846   | 436866 | 124871 | 6230   |
| 197.5 | 79251200  | 3286120 | 3005040 | 24008   | 494496 | 117061 | 9256   |
| 198.5 | 80727500  | 3058010 | 3324940 | 20195   | 516182 | 110336 | 13335  |
| 199.5 | 82177400  | 2836290 | 3673820 | 17099   | 495777 | 104597 | 18629  |
| 200.5 | 83602000  | 2623830 | 4046260 | 14526   | 439888 | 99667  | 25243  |
| 201.5 | 85002700  | 2422920 | 4437450 | 12358   | 364911 | 95337  | 33189  |
| 202.5 | 86380900  | 2235270 | 4842970 | 10516   | 289280 | 91415  | 42347  |
| 203.5 | 87738100  | 2062100 | 5258300 | 8949    | 225989 | 87746  | 52456  |
| 204.5 | 89075400  | 1904200 | 5678090 | 7620    | 179548 | 84225  | 63100  |
| 205.5 | 90392900  | 1762020 | 6095500 | 6505    | 147758 | 80799  | 73736  |
| 206.5 | 91689800  | 1635720 | 6501720 | 5587    | 125633 | 77459  | 83734  |
| 207.5 | 92963800  | 1525280 | 6886120 | 4857    | 108588 | 74235  | 92441  |
| 208.5 | 94211100  | 1430560 | 7237070 | 4318    | 93765  | 71179  | 99248  |
| 209.5 | 95425600  | 1351390 | 7543350 | 3982    | 79924  | 68363  | 103668 |
| 210.5 | 96599300  | 1287590 | 7796030 | 3878    | 66817  | 65864  | 105392 |
| 211.5 | 97721900  | 1239070 | 7990220 | 4052    | 54622  | 63763  | 104323 |
| 212.5 | 98780800  | 1205880 | 8126200 | 4576    | 43604  | 62139  | 100586 |
| 213.5 | 99761400  | 1188210 | 8209490 | 5553    | 33969  | 61064  | 94505  |
| 214.5 | 100647000 | 1186460 | 8249560 | 7121    | 25814  | 60601  | 86557  |
| 215.5 | 101421000 | 1201250 | 8257330 | 9458    | 19132  | 60806  | 77313  |

|       |           |          |         |        |       |        |       |
|-------|-----------|----------|---------|--------|-------|--------|-------|
| 216.5 | 102063000 | 1233430  | 8241940 | 12790  | 13825 | 61725  | 67372 |
| 217.5 | 102556000 | 1284020  | 8207720 | 17385  | 9741  | 63390  | 57300 |
| 218.5 | 102881000 | 1354220  | 8152070 | 23554  | 6690  | 65827  | 47582 |
| 219.5 | 103023000 | 1445340  | 8065300 | 31639  | 4480  | 69048  | 38592 |
| 220.5 | 102967000 | 1558690  | 7932620 | 41999  | 2924  | 73054  | 30584 |
| 221.5 | 102703000 | 1695520  | 7738070 | 54985  | 1861  | 77835  | 23692 |
| 222.5 | 102223000 | 1856830  | 7469490 | 70911  | 1155  | 83370  | 17944 |
| 223.5 | 101525000 | 2043320  | 7123260 | 90025  | 699   | 89626  | 13294 |
| 224.5 | 100609000 | 2255170  | 6707300 | 112465 | 413   | 96559  | 9637  |
| 225.5 | 99481100  | 2491990  | 6241360 | 138231 | 238   | 104113 | 6837  |
| 226.5 | 98152100  | 2752680  | 5754340 | 167150 | 134   | 112221 | 4750  |
| 227.5 | 96635600  | 3035370  | 5279210 | 198859 | 74    | 120808 | 3231  |
| 228.5 | 94948900  | 3337400  | 4846750 | 232795 | 39    | 129788 | 2153  |
| 229.5 | 93112200  | 3655400  | 4479670 | 268200 | 21    | 139067 | 1406  |
| 230.5 | 91147400  | 3985350  | 4188530 | 304148 | 11    | 148545 | 900   |
| 231.5 | 89077700  | 4322800  | 3970290 | 339581 | 5     | 158118 | 565   |
| 232.5 | 86926900  | 4663090  | 3809610 | 373361 | 3     | 167679 | 348   |
| 233.5 | 84718400  | 5001690  | 3682650 | 404335 | 1     | 177120 | 210   |
| 234.5 | 82474500  | 5334610  | 3562190 | 431406 | 0     | 186336 | 124   |
| 235.5 | 80216300  | 5658830  | 3423210 | 453605 | 0     | 195224 | 72    |
| 236.5 | 77963100  | 5972840  | 3247500 | 470161 | 0     | 203689 | 41    |
| 237.5 | 75732000  | 6277200  | 3026680 | 480572 | 0     | 211641 | 23    |
| 238.5 | 73537800  | 6575030  | 2762900 | 484669 | 0     | 219002 | 13    |
| 239.5 | 71393000  | 6872440  | 2467370 | 482684 | 0     | 225703 | 7     |
| 240.5 | 69307800  | 7178720  | 2157200 | 475309 | 0     | 231687 | 4     |
| 241.5 | 67290300  | 7506120  | 1851510 | 463768 | 0     | 236908 | 2     |
| 242.5 | 65346400  | 7869100  | 1567650 | 449840 | 0     | 241335 | 0     |
| 243.5 | 63480100  | 8282880  | 1318540 | 435830 | 0     | 244946 | 0     |
| 244.5 | 61693900  | 8761300  | 1111350 | 424378 | 0     | 247732 | 0     |
| 245.5 | 59988800  | 9313990  | 947650  | 418065 | 0     | 249697 | 0     |
| 246.5 | 58364400  | 9943320  | 824480  | 418772 | 0     | 250853 | 0     |
| 247.5 | 56819600  | 10641600 | 736070  | 426919 | 0     | 251221 | 0     |
| 248.5 | 55352200  | 11388900 | 675430  | 440819 | 0     | 250831 | 0     |
| 249.5 | 53959400  | 12153100 | 635640  | 456530 | 1     | 249721 | 0     |
| 250.5 | 52637900  | 12891000 | 610710  | 468446 | 2     | 247932 | 0     |
| 251.5 | 51384100  | 13552600 | 595870  | 470667 | 4     | 245512 | 0     |
| 252.5 | 50194000  | 14086300 | 587640  | 458725 | 6     | 242510 | 0     |
| 253.5 | 49063700  | 14445600 | 583660  | 431008 | 10    | 238979 | 0     |
| 254.5 | 47988900  | 14595600 | 582380  | 389263 | 16    | 234975 | 0     |
| 255.5 | 46965500  | 14517700 | 582890  | 337964 | 25    | 230555 | 0     |
| 256.5 | 45989300  | 14212400 | 584640  | 282840 | 40    | 225776 | 0     |
| 257.5 | 45056400  | 13698900 | 587370  | 229252 | 63    | 220699 | 0     |
| 258.5 | 44162700  | 13012100 | 590950  | 181028 | 97    | 215387 | 0     |
| 259.5 | 43304700  | 12198100 | 595340  | 140082 | 148   | 209906 | 0     |

|       |          |          |         |        |       |        |   |
|-------|----------|----------|---------|--------|-------|--------|---|
| 260.5 | 42478500 | 11307500 | 600560  | 106701 | 223   | 204326 | 0 |
| 261.5 | 41680900 | 10390100 | 606650  | 80172  | 331   | 198726 | 0 |
| 262.5 | 40908500 | 9489920  | 613710  | 59392  | 486   | 193188 | 0 |
| 263.5 | 40158400 | 8641600  | 621820  | 43273  | 704   | 187803 | 0 |
| 264.5 | 39427700 | 7869330  | 631090  | 30901  | 1005  | 182673 | 0 |
| 265.5 | 38713600 | 7186760  | 641660  | 21557  | 1416  | 177903 | 0 |
| 266.5 | 38013900 | 6598390  | 653650  | 14655  | 1967  | 173606 | 0 |
| 267.5 | 37326200 | 6101610  | 667230  | 9700   | 2695  | 169897 | 0 |
| 268.5 | 36648500 | 5688910  | 682570  | 6257   | 3639  | 166885 | 0 |
| 269.5 | 35978900 | 5350040  | 699840  | 3948   | 4845  | 164668 | 0 |
| 270.5 | 35315800 | 5073760  | 719230  | 2455   | 6360  | 163326 | 0 |
| 271.5 | 34657500 | 4849110  | 740930  | 1525   | 8229  | 162909 | 0 |
| 272.5 | 34002800 | 4666240  | 765120  | 965    | 10497 | 163430 | 0 |
| 273.5 | 33350500 | 4516890  | 791990  | 638    | 13200 | 164855 | 0 |
| 274.5 | 32699700 | 4394470  | 821710  | 451    | 16363 | 167102 | 0 |
| 275.5 | 32049300 | 4294050  | 854450  | 346    | 19995 | 170036 | 0 |
| 276.5 | 31398800 | 4212180  | 890330  | 285    | 24086 | 173474 | 0 |
| 277.5 | 30747500 | 4146660  | 929470  | 247    | 28603 | 177191 | 0 |
| 278.5 | 30095100 | 4096340  | 971930  | 221    | 33487 | 180933 | 0 |
| 279.5 | 29441200 | 4060850  | 1017740 | 201    | 38651 | 184429 | 0 |
| 280.5 | 28785500 | 4040430  | 1066900 | 184    | 43984 | 187414 | 0 |
| 281.5 | 28128200 | 4035780  | 1119360 | 168    | 49351 | 189638 | 0 |
| 282.5 | 27469100 | 4047900  | 1175020 | 153    | 54598 | 190891 | 0 |
| 283.5 | 26808400 | 4077950  | 1233730 | 139    | 59562 | 191009 | 0 |
| 284.5 | 26146400 | 4127170  | 1295320 | 125    | 64076 | 189885 | 0 |
| 285.5 | 25483300 | 4196800  | 1359570 | 112    | 67979 | 187472 | 0 |
| 286.5 | 24819700 | 4287940  | 1426240 | 100    | 71127 | 183787 | 0 |
| 287.5 | 24156000 | 4401510  | 1495060 | 88     | 73402 | 178896 | 0 |
| 288.5 | 23492700 | 4538170  | 1565740 | 78     | 74717 | 172914 | 0 |
| 289.5 | 22830500 | 4698220  | 1638000 | 68     | 75025 | 165988 | 0 |
| 290.5 | 22170100 | 4881600  | 1711540 | 59     | 74317 | 158290 | 0 |
| 291.5 | 21512200 | 5087800  | 1786070 | 51     | 72627 | 149999 | 0 |
| 292.5 | 20857600 | 5315800  | 1861330 | 44     | 70029 | 141297 | 0 |
| 293.5 | 20207200 | 5564120  | 1937050 | 37     | 66626 | 132359 | 0 |
| 294.5 | 19561700 | 5830740  | 2013000 | 32     | 62552 | 123343 | 0 |
| 295.5 | 18922100 | 6113160  | 2088940 | 27     | 57955 | 114390 | 0 |
| 296.5 | 18289300 | 6408400  | 2164690 | 22     | 52996 | 105621 | 0 |
| 297.5 | 17664100 | 6713080  | 2240070 | 18     | 47831 | 97136  | 0 |
| 298.5 | 17047300 | 7023460  | 2314920 | 15     | 42613 | 89015  | 0 |
| 299.5 | 16440000 | 7335540  | 2389090 | 13     | 37477 | 81318  | 0 |
| 300.5 | 15842800 | 7645140  | 2462450 | 10     | 32540 | 74091  | 0 |
| 301.5 | 15256600 | 7947990  | 2534890 | 8      | 27896 | 67360  | 0 |
| 302.5 | 14682100 | 8239850  | 2606280 | 7      | 23613 | 61141  | 0 |
| 303.5 | 14120000 | 8516610  | 2676530 | 5      | 19737 | 55439  | 0 |



|       |          |         |          |   |       |       |   |
|-------|----------|---------|----------|---|-------|-------|---|
| 304.5 | 13570900 | 8774380 | 2745510  | 4 | 16293 | 50246 | 0 |
| 305.5 | 13035500 | 9009570 | 2813110  | 3 | 13283 | 45550 | 0 |
| 306.5 | 12514100 | 9218980 | 2879190  | 3 | 10697 | 41329 | 0 |
| 307.5 | 12007200 | 9399860 | 2943640  | 2 | 8509  | 37558 | 0 |
| 308.5 | 11515000 | 9549970 | 3006310  | 2 | 6686  | 34207 | 0 |
| 309.5 | 11038000 | 9667590 | 3067040  | 1 | 5191  | 31245 | 0 |
| 310.5 | 10576100 | 9751560 | 3125710  | 0 | 3982  | 28638 | 0 |
| 311.5 | 10129400 | 9801270 | 3182170  | 0 | 3018  | 26353 | 0 |
| 312.5 | 9698000  | 9816660 | 3236330  | 0 | 2261  | 24358 | 0 |
| 313.5 | 9281720  | 9798210 | 3288150  | 0 | 1673  | 22619 | 0 |
| 314.5 | 8880400  | 9746880 | 3337680  | 0 | 1224  | 21108 | 0 |
| 315.5 | 8493800  | 9664070 | 3385130  | 0 | 885   | 19796 | 0 |
| 316.5 | 8121640  | 9551630 | 3430950  | 0 | 633   | 18657 | 0 |
| 317.5 | 7763560  | 9411710 | 3475890  | 0 | 447   | 17670 | 0 |
| 318.5 | 7419170  | 9246790 | 3521150  | 0 | 312   | 16812 | 0 |
| 319.5 | 7088040  | 9059580 | 3568500  | 0 | 216   | 16067 | 0 |
| 320.5 | 6769740  | 8852920 | 3620450  | 0 | 147   | 15418 | 0 |
| 321.5 | 6463790  | 8629820 | 3680380  | 0 | 100   | 14852 | 0 |
| 322.5 | 6169740  | 8393300 | 3752670  | 0 | 67    | 14356 | 0 |
| 323.5 | 5887120  | 8146380 | 3842810  | 0 | 44    | 13921 | 0 |
| 324.5 | 5615500  | 7892040 | 3957340  | 0 | 29    | 13539 | 0 |
| 325.5 | 5354440  | 7633140 | 4103760  | 0 | 19    | 13202 | 0 |
| 326.5 | 5103550  | 7372400 | 4290190  | 0 | 12    | 12904 | 0 |
| 327.5 | 4862470  | 7112390 | 4524890  | 0 | 8     | 12641 | 0 |
| 328.5 | 4630880  | 6855460 | 4815530  | 0 | 5     | 12406 | 0 |
| 329.5 | 4408490  | 6603730 | 5168330  | 0 | 3     | 12198 | 0 |
| 330.5 | 4195060  | 6359130 | 5587050  | 0 | 2     | 12012 | 0 |
| 331.5 | 3990400  | 6123340 | 6071990  | 0 | 1     | 11847 | 0 |
| 332.5 | 3794350  | 5897820 | 6619080  | 0 | 0     | 11700 | 0 |
| 333.5 | 3606780  | 5683810 | 7219310  | 0 | 0     | 11569 | 0 |
| 334.5 | 3427620  | 5482360 | 7858500  | 0 | 0     | 11451 | 0 |
| 335.5 | 3256800  | 5294330 | 8517630  | 0 | 0     | 11347 | 0 |
| 336.5 | 3094290  | 5120440 | 9173790  | 0 | 0     | 11254 | 0 |
| 337.5 | 2940080  | 4961240 | 9801510  | 0 | 0     | 11171 | 0 |
| 338.5 | 2794150  | 4817210 | 10374600 | 0 | 0     | 11097 | 0 |
| 339.5 | 2656500  | 4688710 | 10868200 | 0 | 0     | 11032 | 0 |
| 340.5 | 2527140  | 4576050 | 11260700 | 0 | 0     | 10973 | 0 |
| 341.5 | 2406030  | 4479490 | 11535200 | 0 | 0     | 10921 | 0 |
| 342.5 | 2293150  | 4399270 | 11681100 | 0 | 0     | 10874 | 0 |
| 343.5 | 2188450  | 4335620 | 11694200 | 0 | 0     | 10832 | 0 |
| 344.5 | 2091850  | 4288760 | 11577000 | 0 | 0     | 10794 | 0 |
| 345.5 | 2003260  | 4258880 | 11337600 | 0 | 0     | 10759 | 0 |
| 346.5 | 1922530  | 4246210 | 10989300 | 0 | 0     | 10726 | 0 |
| 347.5 | 1849510  | 4250900 | 10548400 | 0 | 0     | 10696 | 0 |

|       |         |         |          |   |   |       |   |
|-------|---------|---------|----------|---|---|-------|---|
| 348.5 | 1784020 | 4273110 | 10033400 | 0 | 0 | 10667 | 0 |
| 349.5 | 1725850 | 4312870 | 9463390  | 0 | 0 | 10638 | 0 |
| 350.5 | 1674750 | 4370130 | 8857010  | 0 | 0 | 10610 | 0 |
| 351.5 | 1630490 | 4444700 | 8231580  | 0 | 0 | 10581 | 0 |
| 352.5 | 1592780 | 4536160 | 7602500  | 0 | 0 | 10551 | 0 |
| 353.5 | 1561340 | 4643880 | 6982960  | 0 | 0 | 10520 | 0 |
| 354.5 | 1535890 | 4766910 | 6383830  | 0 | 0 | 10486 | 0 |
| 355.5 | 1516130 | 4904020 | 5813660  | 0 | 0 | 10450 | 0 |
| 356.5 | 1501770 | 5053600 | 5278860  | 0 | 0 | 10411 | 0 |
| 357.5 | 1492510 | 5213680 | 4783880  | 0 | 0 | 10369 | 0 |
| 358.5 | 1488090 | 5381950 | 4331410  | 0 | 0 | 10323 | 0 |
| 359.5 | 1488210 | 5555750 | 3922600  | 0 | 0 | 10273 | 0 |
| 360.5 | 1492630 | 5732140 | 3557350  | 0 | 0 | 10218 | 0 |
| 361.5 | 1501080 | 5907940 | 3234460  | 0 | 0 | 10158 | 0 |
| 362.5 | 1513350 | 6079830 | 2951900  | 0 | 0 | 10093 | 0 |
| 363.5 | 1529190 | 6244440 | 2707030  | 0 | 0 | 10023 | 0 |
| 364.5 | 1548410 | 6398460 | 2496760  | 0 | 0 | 9947  | 0 |
| 365.5 | 1570790 | 6538720 | 2317760  | 0 | 0 | 9865  | 0 |
| 366.5 | 1596150 | 6662350 | 2166580  | 0 | 0 | 9777  | 0 |
| 367.5 | 1624310 | 6766820 | 2039830  | 0 | 0 | 9682  | 0 |
| 368.5 | 1655070 | 6850070 | 1934260  | 0 | 0 | 9582  | 0 |
| 369.5 | 1688250 | 6910540 | 1846830  | 0 | 0 | 9475  | 0 |
| 370.5 | 1723690 | 6947230 | 1774760  | 0 | 0 | 9362  | 0 |
| 371.5 | 1761180 | 6959690 | 1715560  | 0 | 0 | 9242  | 0 |
| 372.5 | 1800540 | 6948070 | 1667070  | 0 | 0 | 9116  | 0 |
| 373.5 | 1841560 | 6913020 | 1627380  | 0 | 0 | 8984  | 0 |
| 374.5 | 1884030 | 6855660 | 1594890  | 0 | 0 | 8845  | 0 |
| 375.5 | 1927710 | 6777540 | 1568250  | 0 | 0 | 8701  | 0 |
| 376.5 | 1972360 | 6680510 | 1546330  | 0 | 0 | 8551  | 0 |
| 377.5 | 2017700 | 6566690 | 1528200  | 0 | 0 | 8396  | 0 |
| 378.5 | 2063450 | 6438330 | 1513120  | 0 | 0 | 8235  | 0 |
| 379.5 | 2109310 | 6297750 | 1500460  | 0 | 0 | 8070  | 0 |
| 380.5 | 2154930 | 6147280 | 1489760  | 0 | 0 | 7900  | 0 |
| 381.5 | 2199970 | 5989150 | 1480620  | 0 | 0 | 7727  | 0 |
| 382.5 | 2244060 | 5825470 | 1472760  | 0 | 0 | 7550  | 0 |
| 383.5 | 2286810 | 5658180 | 1465970  | 0 | 0 | 7370  | 0 |
| 384.5 | 2327830 | 5489000 | 1460110  | 0 | 0 | 7187  | 0 |
| 385.5 | 2366680 | 5319450 | 1455070  | 0 | 0 | 7003  | 0 |
| 386.5 | 2402970 | 5150800 | 1450840  | 0 | 0 | 6818  | 0 |
| 387.5 | 2436250 | 4984130 | 1447420  | 0 | 0 | 6632  | 0 |
| 388.5 | 2466120 | 4820280 | 1444880  | 0 | 0 | 6447  | 0 |
| 389.5 | 2492160 | 4659910 | 1443330  | 0 | 0 | 6264  | 0 |
| 390.5 | 2513990 | 4503510 | 1442930  | 0 | 0 | 6083  | 0 |
| 391.5 | 2531240 | 4351440 | 1443880  | 0 | 0 | 5905  | 0 |

|       |         |         |         |   |   |       |   |
|-------|---------|---------|---------|---|---|-------|---|
| 392.5 | 2543560 | 4203910 | 1446420 | 0 | 0 | 5732  | 0 |
| 393.5 | 2550660 | 4061060 | 1450850 | 0 | 0 | 5564  | 0 |
| 394.5 | 2552300 | 3922940 | 1457500 | 0 | 0 | 5404  | 0 |
| 395.5 | 2548260 | 3789580 | 1466740 | 0 | 0 | 5253  | 0 |
| 396.5 | 2538400 | 3660940 | 1478990 | 0 | 0 | 5113  | 0 |
| 397.5 | 2522640 | 3536970 | 1494680 | 0 | 0 | 4986  | 0 |
| 398.5 | 2500960 | 3417630 | 1514290 | 0 | 0 | 4873  | 0 |
| 399.5 | 2473420 | 3302860 | 1538280 | 0 | 0 | 4778  | 0 |
| 400.5 | 2440130 | 3192620 | 1567150 | 0 | 0 | 4703  | 0 |
| 401.5 | 2401280 | 3086880 | 1601350 | 0 | 0 | 4652  | 0 |
| 402.5 | 2357120 | 2985610 | 1641340 | 0 | 0 | 4627  | 0 |
| 403.5 | 2307970 | 2888810 | 1687510 | 0 | 0 | 4634  | 0 |
| 404.5 | 2254200 | 2796470 | 1740200 | 0 | 0 | 4675  | 0 |
| 405.5 | 2196230 | 2708610 | 1799670 | 0 | 0 | 4756  | 0 |
| 406.5 | 2134510 | 2625230 | 1866050 | 0 | 0 | 4883  | 0 |
| 407.5 | 2069560 | 2546360 | 1939390 | 0 | 0 | 5061  | 0 |
| 408.5 | 2001880 | 2472010 | 2019560 | 0 | 0 | 5298  | 0 |
| 409.5 | 1932020 | 2402190 | 2106290 | 0 | 0 | 5600  | 0 |
| 410.5 | 1860500 | 2336900 | 2199130 | 0 | 0 | 5976  | 0 |
| 411.5 | 1787860 | 2276160 | 2297450 | 0 | 0 | 6434  | 0 |
| 412.5 | 1714620 | 2219940 | 2400460 | 0 | 0 | 6984  | 0 |
| 413.5 | 1641280 | 2168240 | 2507160 | 0 | 0 | 7638  | 0 |
| 414.5 | 1568300 | 2121010 | 2616400 | 0 | 0 | 8404  | 0 |
| 415.5 | 1496130 | 2078210 | 2726870 | 0 | 0 | 9297  | 0 |
| 416.5 | 1425140 | 2039800 | 2837140 | 0 | 0 | 10327 | 0 |
| 417.5 | 1355690 | 2005710 | 2945680 | 0 | 0 | 11508 | 0 |
| 418.5 | 1288080 | 1975860 | 3050900 | 0 | 0 | 12854 | 0 |
| 419.5 | 1222570 | 1950190 | 3151190 | 0 | 0 | 14378 | 0 |
| 420.5 | 1159370 | 1928590 | 3244940 | 0 | 0 | 16094 | 0 |
| 421.5 | 1098650 | 1910970 | 3330650 | 0 | 0 | 18015 | 0 |
| 422.5 | 1040520 | 1897240 | 3406900 | 0 | 0 | 20154 | 0 |
| 423.5 | 985080  | 1887290 | 3472420 | 0 | 0 | 22522 | 0 |
| 424.5 | 932360  | 1881000 | 3526130 | 0 | 0 | 25131 | 0 |
| 425.5 | 882380  | 1878280 | 3567170 | 0 | 0 | 27989 | 0 |
| 426.5 | 835140  | 1879000 | 3594900 | 0 | 0 | 31103 | 0 |
| 427.5 | 790590  | 1883040 | 3608960 | 0 | 0 | 34475 | 0 |
| 428.5 | 748670  | 1890290 | 3609220 | 0 | 0 | 38107 | 0 |
| 429.5 | 709320  | 1900620 | 3595820 | 0 | 0 | 41994 | 0 |
| 430.5 | 672450  | 1913910 | 3569110 | 0 | 0 | 46130 | 0 |
| 431.5 | 637950  | 1930030 | 3529720 | 0 | 0 | 50500 | 0 |
| 432.5 | 605750  | 1948840 | 3478410 | 0 | 0 | 55089 | 0 |
| 433.5 | 575720  | 1970220 | 3416170 | 0 | 0 | 59873 | 0 |
| 434.5 | 547770  | 1994020 | 3344080 | 0 | 0 | 64823 | 0 |
| 435.5 | 521790  | 2020080 | 3263340 | 0 | 0 | 69906 | 0 |

|       |        |         |         |   |   |        |   |
|-------|--------|---------|---------|---|---|--------|---|
| 436.5 | 497680 | 2048250 | 3175220 | 0 | 0 | 75081  | 0 |
| 437.5 | 475350 | 2078370 | 3081020 | 0 | 0 | 80307  | 0 |
| 438.5 | 454690 | 2110270 | 2982020 | 0 | 0 | 85532  | 0 |
| 439.5 | 435620 | 2143740 | 2879510 | 0 | 0 | 90705  | 0 |
| 440.5 | 418050 | 2178610 | 2774690 | 0 | 0 | 95771  | 0 |
| 441.5 | 401910 | 2214650 | 2668730 | 0 | 0 | 100671 | 0 |
| 442.5 | 387120 | 2251650 | 2562660 | 0 | 0 | 105346 | 0 |
| 443.5 | 373610 | 2289370 | 2457470 | 0 | 0 | 109740 | 0 |
| 444.5 | 361320 | 2327570 | 2354020 | 0 | 0 | 113794 | 0 |
| 445.5 | 350190 | 2365980 | 2253040 | 0 | 0 | 117455 | 0 |
| 446.5 | 340170 | 2404330 | 2155210 | 0 | 0 | 120674 | 0 |
| 447.5 | 331220 | 2442360 | 2061070 | 0 | 0 | 123405 | 0 |
| 448.5 | 323280 | 2479760 | 1971090 | 0 | 0 | 125612 | 0 |
| 449.5 | 316330 | 2516260 | 1885650 | 0 | 0 | 127262 | 0 |
| 450.5 | 310330 | 2551560 | 1805070 | 0 | 0 | 128334 | 0 |
| 451.5 | 305260 | 2585370 | 1729630 | 0 | 0 | 128814 | 0 |
| 452.5 | 301090 | 2617400 | 1659550 | 0 | 0 | 128697 | 0 |
| 453.5 | 297800 | 2647400 | 1595060 | 0 | 0 | 127986 | 0 |
| 454.5 | 295380 | 2675100 | 1536360 | 0 | 0 | 126696 | 0 |
| 455.5 | 293830 | 2700280 | 1483690 | 0 | 0 | 124846 | 0 |
| 456.5 | 293140 | 2722720 | 1437320 | 0 | 0 | 122467 | 0 |
| 457.5 | 293320 | 2742270 | 1397550 | 0 | 0 | 119595 | 0 |
| 458.5 | 294360 | 2758790 | 1364770 | 0 | 0 | 116271 | 0 |
| 459.5 | 296300 | 2772180 | 1339430 | 0 | 0 | 112544 | 0 |
| 460.5 | 299140 | 2782420 | 1322030 | 0 | 0 | 108463 | 0 |
| 461.5 | 302910 | 2789510 | 1313180 | 0 | 0 | 104084 | 0 |
| 462.5 | 307650 | 2793510 | 1313550 | 0 | 0 | 99459  | 0 |
| 463.5 | 313380 | 2794560 | 1323850 | 0 | 0 | 94646  | 0 |
| 464.5 | 320150 | 2792820 | 1344850 | 0 | 0 | 89698  | 0 |
| 465.5 | 328010 | 2788530 | 1377280 | 0 | 0 | 84668  | 0 |
| 466.5 | 337010 | 2781990 | 1421870 | 0 | 0 | 79605  | 0 |
| 467.5 | 347200 | 2773540 | 1479210 | 0 | 0 | 74557  | 0 |
| 468.5 | 358630 | 2763550 | 1549760 | 0 | 0 | 69565  | 0 |
| 469.5 | 371380 | 2752470 | 1633780 | 0 | 0 | 64668  | 0 |
| 470.5 | 385480 | 2740760 | 1731200 | 0 | 0 | 59900  | 0 |
| 471.5 | 401010 | 2728890 | 1841640 | 0 | 0 | 55288  | 0 |
| 472.5 | 418000 | 2717400 | 1964280 | 0 | 0 | 50857  | 0 |
| 473.5 | 436500 | 2706780 | 2097860 | 0 | 0 | 46625  | 0 |
| 474.5 | 456560 | 2697560 | 2240590 | 0 | 0 | 42608  | 0 |
| 475.5 | 478170 | 2690250 | 2390180 | 0 | 0 | 38815  | 0 |
| 476.5 | 501370 | 2685330 | 2543830 | 0 | 0 | 35252  | 0 |
| 477.5 | 526120 | 2683250 | 2698280 | 0 | 0 | 31922  | 0 |
| 478.5 | 552400 | 2684460 | 2849860 | 0 | 0 | 28825  | 0 |
| 479.5 | 580140 | 2689310 | 2994620 | 0 | 0 | 25957  | 0 |

|       |         |         |         |   |   |       |   |
|-------|---------|---------|---------|---|---|-------|---|
| 480.5 | 609270  | 2698130 | 3128460 | 0 | 0 | 23313 | 0 |
| 481.5 | 639680  | 2711200 | 3247280 | 0 | 0 | 20885 | 0 |
| 482.5 | 671220  | 2728710 | 3347140 | 0 | 0 | 18665 | 0 |
| 483.5 | 703720  | 2750790 | 3424530 | 0 | 0 | 16642 | 0 |
| 484.5 | 736980  | 2777500 | 3476440 | 0 | 0 | 14805 | 0 |
| 485.5 | 770780  | 2808830 | 3500620 | 0 | 0 | 13143 | 0 |
| 486.5 | 804860  | 2844680 | 3495680 | 0 | 0 | 11645 | 0 |
| 487.5 | 838950  | 2884890 | 3461170 | 0 | 0 | 10297 | 0 |
| 488.5 | 872760  | 2929200 | 3397640 | 0 | 0 | 9088  | 0 |
| 489.5 | 905980  | 2977290 | 3306620 | 0 | 0 | 8008  | 0 |
| 490.5 | 938300  | 3028770 | 3190550 | 0 | 0 | 7045  | 0 |
| 491.5 | 969410  | 3083160 | 3052620 | 0 | 0 | 6188  | 0 |
| 492.5 | 999000  | 3139940 | 2896630 | 0 | 0 | 5428  | 0 |
| 493.5 | 1026770 | 3198500 | 2726770 | 0 | 0 | 4754  | 0 |
| 494.5 | 1052450 | 3258190 | 2547410 | 0 | 0 | 4160  | 0 |
| 495.5 | 1075800 | 3318330 | 2362880 | 0 | 0 | 3635  | 0 |
| 496.5 | 1096600 | 3378160 | 2177250 | 0 | 0 | 3173  | 0 |
| 497.5 | 1114680 | 3436910 | 1994210 | 0 | 0 | 2768  | 0 |
| 498.5 | 1129910 | 3493800 | 1816890 | 0 | 0 | 2412  | 0 |
| 499.5 | 1142190 | 3548030 | 1647830 | 0 | 0 | 2100  | 0 |
| 500.5 | 1151500 | 3598790 | 1488950 | 0 | 0 | 1827  | 0 |
| 501.5 | 1157840 | 3645310 | 1341520 | 0 | 0 | 1589  | 0 |
| 502.5 | 1161270 | 3686810 | 1206240 | 0 | 0 | 1381  | 0 |
| 503.5 | 1161890 | 3722580 | 1083310 | 0 | 0 | 1200  | 0 |
| 504.5 | 1159870 | 3751960 | 972540  | 0 | 0 | 1042  | 0 |
| 505.5 | 1155370 | 3774340 | 873390  | 0 | 0 | 905   | 0 |
| 506.5 | 1148620 | 3789190 | 785120  | 0 | 0 | 785   | 0 |
| 507.5 | 1139860 | 3796070 | 706850  | 0 | 0 | 682   | 0 |
| 508.5 | 1129350 | 3794630 | 637640  | 0 | 0 | 592   | 0 |
| 509.5 | 1117360 | 3784650 | 576520  | 0 | 0 | 513   | 0 |
| 510.5 | 1104170 | 3765970 | 522580  | 0 | 0 | 446   | 0 |
| 511.5 | 1090050 | 3738590 | 474950  | 0 | 0 | 387   | 0 |
| 512.5 | 1075250 | 3702590 | 432870  | 0 | 0 | 336   | 0 |
| 513.5 | 1060020 | 3658190 | 395620  | 0 | 0 | 292   | 0 |
| 514.5 | 1044570 | 3605710 | 362590  | 0 | 0 | 254   | 0 |
| 515.5 | 1029090 | 3545570 | 333250  | 0 | 0 | 221   | 0 |
| 516.5 | 1013730 | 3478280 | 307140  | 0 | 0 | 192   | 0 |
| 517.5 | 998620  | 3404450 | 283860  | 0 | 0 | 167   | 0 |
| 518.5 | 983820  | 3324750 | 263060  | 0 | 0 | 146   | 0 |
| 519.5 | 969400  | 3239930 | 244440  | 0 | 0 | 127   | 0 |
| 520.5 | 955340  | 3150760 | 227750  | 0 | 0 | 111   | 0 |
| 521.5 | 941640  | 3058050 | 212770  | 0 | 0 | 97    | 0 |
| 522.5 | 928210  | 2962640 | 199300  | 0 | 0 | 85    | 0 |
| 523.5 | 914990  | 2865340 | 187180  | 0 | 0 | 74    | 0 |

|       |        |         |        |     |   |    |   |
|-------|--------|---------|--------|-----|---|----|---|
| 524.5 | 901850 | 2766960 | 176260 | 0   | 0 | 65 | 0 |
| 525.5 | 888660 | 2668300 | 166400 | 0   | 0 | 57 | 0 |
| 526.5 | 875280 | 2570080 | 157510 | 0   | 0 | 50 | 0 |
| 527.5 | 861560 | 2473010 | 149480 | 0   | 0 | 44 | 0 |
| 528.5 | 847340 | 2377690 | 142230 | 0   | 0 | 39 | 0 |
| 529.5 | 832480 | 2284700 | 135670 | 0   | 0 | 34 | 0 |
| 530.5 | 816830 | 2194520 | 129760 | 0   | 0 | 30 | 0 |
| 531.5 | 800270 | 2107560 | 124430 | 0   | 0 | 27 | 0 |
| 532.5 | 782700 | 2024160 | 119630 | 0   | 0 | 24 | 0 |
| 533.5 | 764030 | 1944580 | 115320 | 0   | 0 | 21 | 0 |
| 534.5 | 744210 | 1869010 | 111460 | 0   | 0 | 19 | 0 |
| 535.5 | 723210 | 1797550 | 108030 | 0   | 0 | 16 | 0 |
| 536.5 | 701050 | 1730260 | 104990 | 0   | 0 | 15 | 0 |
| 537.5 | 677760 | 1667140 | 102330 | 0   | 0 | 13 | 0 |
| 538.5 | 653410 | 1608110 | 100020 | 0   | 0 | 12 | 0 |
| 539.5 | 628090 | 1553080 | 98050  | 0   | 0 | 10 | 0 |
| 540.5 | 601940 | 1501900 | 96410  | 0   | 0 | 9  | 0 |
| 541.5 | 575110 | 1454390 | 95080  | 0   | 0 | 8  | 0 |
| 542.5 | 547760 | 1410350 | 94070  | 0   | 0 | 8  | 0 |
| 543.5 | 520080 | 1369540 | 93380  | 0   | 0 | 7  | 0 |
| 544.5 | 492270 | 1331740 | 92990  | 0   | 0 | 6  | 0 |
| 545.5 | 464530 | 1296700 | 92920  | 1   | 0 | 6  | 0 |
| 546.5 | 437080 | 1264170 | 93180  | 2   | 0 | 5  | 0 |
| 547.5 | 410120 | 1233900 | 93760  | 2   | 0 | 5  | 0 |
| 548.5 | 383830 | 1205650 | 94690  | 3   | 0 | 4  | 0 |
| 549.5 | 358410 | 1179180 | 95980  | 4   | 0 | 4  | 0 |
| 550.5 | 334020 | 1154260 | 97650  | 5   | 0 | 4  | 0 |
| 551.5 | 310810 | 1130670 | 99720  | 7   | 0 | 3  | 0 |
| 552.5 | 288890 | 1108210 | 102230 | 9   | 0 | 3  | 0 |
| 553.5 | 268380 | 1086680 | 105190 | 12  | 0 | 3  | 0 |
| 554.5 | 249340 | 1065920 | 108640 | 16  | 0 | 3  | 0 |
| 555.5 | 231840 | 1045750 | 112630 | 20  | 0 | 2  | 0 |
| 556.5 | 215890 | 1026040 | 117190 | 26  | 0 | 2  | 0 |
| 557.5 | 201510 | 1006650 | 122360 | 34  | 0 | 2  | 0 |
| 558.5 | 188680 | 987460  | 128200 | 43  | 0 | 2  | 0 |
| 559.5 | 177360 | 968370  | 134750 | 55  | 0 | 2  | 0 |
| 560.5 | 167510 | 949300  | 142080 | 70  | 0 | 2  | 0 |
| 561.5 | 159050 | 930180  | 150220 | 88  | 0 | 2  | 0 |
| 562.5 | 151910 | 910950  | 159240 | 110 | 0 | 1  | 0 |
| 563.5 | 146000 | 891560  | 169190 | 137 | 0 | 1  | 0 |
| 564.5 | 141240 | 871990  | 180120 | 170 | 0 | 1  | 0 |
| 565.5 | 137520 | 852220  | 192070 | 209 | 0 | 1  | 0 |
| 566.5 | 134760 | 832240  | 205070 | 256 | 0 | 1  | 0 |
| 567.5 | 132850 | 812080  | 219160 | 312 | 0 | 1  | 0 |

|       |        |        |        |       |   |   |   |
|-------|--------|--------|--------|-------|---|---|---|
| 568.5 | 131690 | 791740 | 234330 | 378   | 0 | 1 | 0 |
| 569.5 | 131210 | 771270 | 250590 | 456   | 0 | 1 | 0 |
| 570.5 | 131310 | 750700 | 267890 | 546   | 0 | 1 | 0 |
| 571.5 | 131910 | 730090 | 286180 | 652   | 0 | 1 | 0 |
| 572.5 | 132940 | 709500 | 305360 | 773   | 0 | 1 | 0 |
| 573.5 | 134320 | 689000 | 325320 | 911   | 0 | 1 | 0 |
| 574.5 | 136000 | 668670 | 345900 | 1069  | 0 | 1 | 0 |
| 575.5 | 137910 | 648600 | 366880 | 1248  | 0 | 1 | 0 |
| 576.5 | 140000 | 628860 | 388020 | 1449  | 0 | 1 | 0 |
| 577.5 | 142230 | 609550 | 409050 | 1673  | 0 | 1 | 0 |
| 578.5 | 144550 | 590770 | 429630 | 1922  | 0 | 1 | 0 |
| 579.5 | 146930 | 572610 | 449420 | 2196  | 0 | 1 | 0 |
| 580.5 | 149340 | 555170 | 468030 | 2497  | 0 | 1 | 0 |
| 581.5 | 151740 | 538530 | 485070 | 2823  | 0 | 1 | 0 |
| 582.5 | 154100 | 522790 | 500120 | 3176  | 0 | 1 | 0 |
| 583.5 | 156420 | 508020 | 512800 | 3554  | 0 | 0 | 0 |
| 584.5 | 158650 | 494310 | 522730 | 3957  | 0 | 0 | 0 |
| 585.5 | 160800 | 481730 | 529590 | 4383  | 0 | 0 | 0 |
| 586.5 | 162840 | 470330 | 533110 | 4830  | 0 | 0 | 0 |
| 587.5 | 164750 | 460170 | 533090 | 5294  | 0 | 0 | 0 |
| 588.5 | 166530 | 451280 | 529420 | 5775  | 0 | 0 | 0 |
| 589.5 | 168160 | 443700 | 522080 | 6266  | 0 | 0 | 0 |
| 590.5 | 169650 | 437430 | 511180 | 6765  | 0 | 0 | 0 |
| 591.5 | 170970 | 432490 | 496910 | 7267  | 0 | 0 | 0 |
| 592.5 | 172120 | 428850 | 479570 | 7766  | 0 | 0 | 0 |
| 593.5 | 173100 | 426490 | 459550 | 8258  | 0 | 0 | 0 |
| 594.5 | 173910 | 425380 | 437340 | 8737  | 0 | 0 | 0 |
| 595.5 | 174540 | 425450 | 413460 | 9198  | 0 | 0 | 0 |
| 596.5 | 174990 | 426640 | 388490 | 9635  | 0 | 0 | 0 |
| 597.5 | 175280 | 428880 | 363000 | 10043 | 0 | 0 | 0 |
| 598.5 | 175380 | 432060 | 337570 | 10416 | 0 | 0 | 0 |
| 599.5 | 175320 | 436100 | 312740 | 10749 | 0 | 0 | 0 |
| 600.5 | 175100 | 440870 | 288990 | 11039 | 0 | 0 | 0 |
| 601.5 | 174720 | 446260 | 266720 | 11281 | 0 | 0 | 0 |
| 602.5 | 174190 | 452150 | 246270 | 11472 | 0 | 0 | 0 |
| 603.5 | 173530 | 458410 | 227850 | 11609 | 0 | 0 | 0 |
| 604.5 | 172740 | 464900 | 211630 | 11691 | 0 | 0 | 0 |
| 605.5 | 171830 | 471490 | 197630 | 11717 | 0 | 0 | 0 |
| 606.5 | 170830 | 478060 | 185860 | 11686 | 0 | 0 | 0 |
| 607.5 | 169740 | 484460 | 176200 | 11599 | 0 | 0 | 0 |
| 608.5 | 168580 | 490570 | 168530 | 11457 | 0 | 0 | 0 |
| 609.5 | 167370 | 496290 | 162650 | 11263 | 0 | 0 | 0 |
| 610.5 | 166140 | 501480 | 158360 | 11020 | 0 | 0 | 0 |
| 611.5 | 164890 | 506070 | 155450 | 10730 | 0 | 0 | 0 |

|       |        |        |        |       |   |   |   |
|-------|--------|--------|--------|-------|---|---|---|
| 612.5 | 163660 | 509950 | 153690 | 10399 | 0 | 0 | 0 |
| 613.5 | 162470 | 513040 | 152880 | 10031 | 0 | 0 | 0 |
| 614.5 | 161330 | 515300 | 152830 | 9630  | 0 | 0 | 0 |
| 615.5 | 160280 | 516650 | 153370 | 9202  | 0 | 0 | 0 |
| 616.5 | 159340 | 517070 | 154340 | 8752  | 0 | 0 | 0 |
| 617.5 | 158540 | 516540 | 155630 | 8285  | 0 | 0 | 0 |
| 618.5 | 157900 | 515050 | 157110 | 7806  | 0 | 0 | 0 |
| 619.5 | 157450 | 512600 | 158720 | 7321  | 0 | 0 | 0 |
| 620.5 | 157210 | 509230 | 160370 | 6835  | 0 | 0 | 0 |
| 621.5 | 157220 | 504960 | 162020 | 6352  | 0 | 0 | 0 |
| 622.5 | 157490 | 499840 | 163620 | 5875  | 0 | 0 | 0 |
| 623.5 | 158050 | 493940 | 165130 | 5410  | 0 | 0 | 0 |
| 624.5 | 158920 | 487310 | 166540 | 4959  | 0 | 0 | 0 |
| 625.5 | 160130 | 480050 | 167820 | 4525  | 0 | 0 | 0 |
| 626.5 | 161690 | 472230 | 168960 | 4110  | 0 | 0 | 0 |
| 627.5 | 163630 | 463940 | 169940 | 3717  | 0 | 0 | 0 |
| 628.5 | 165940 | 455280 | 170750 | 3346  | 0 | 0 | 0 |
| 629.5 | 168660 | 446340 | 171400 | 2998  | 0 | 0 | 0 |
| 630.5 | 171780 | 437220 | 171860 | 2675  | 0 | 0 | 0 |
| 631.5 | 175310 | 428020 | 172140 | 2376  | 0 | 0 | 0 |
| 632.5 | 179250 | 418830 | 172230 | 2101  | 0 | 0 | 0 |
| 633.5 | 183600 | 409730 | 172120 | 1849  | 0 | 0 | 0 |
| 634.5 | 188350 | 400830 | 171830 | 1621  | 0 | 0 | 0 |
| 635.5 | 193490 | 392180 | 171340 | 1414  | 0 | 0 | 0 |
| 636.5 | 199000 | 383870 | 170650 | 1229  | 0 | 0 | 0 |
| 637.5 | 204850 | 375960 | 169770 | 1063  | 0 | 0 | 0 |
| 638.5 | 211030 | 368500 | 168690 | 916   | 0 | 0 | 0 |
| 639.5 | 217510 | 361540 | 167430 | 785   | 0 | 0 | 0 |
| 640.5 | 224240 | 355110 | 165970 | 670   | 0 | 0 | 0 |
| 641.5 | 231180 | 349250 | 164330 | 570   | 0 | 0 | 0 |
| 642.5 | 238310 | 343980 | 162500 | 482   | 0 | 0 | 0 |
| 643.5 | 245560 | 339290 | 160510 | 407   | 0 | 0 | 0 |
| 644.5 | 252880 | 335190 | 158340 | 341   | 0 | 0 | 0 |
| 645.5 | 260230 | 331680 | 156000 | 285   | 0 | 0 | 0 |
| 646.5 | 267550 | 328720 | 153520 | 237   | 0 | 0 | 0 |
| 647.5 | 274780 | 326300 | 150880 | 197   | 0 | 0 | 0 |
| 648.5 | 281870 | 324370 | 148100 | 162   | 0 | 0 | 0 |
| 649.5 | 288750 | 322910 | 145200 | 133   | 0 | 0 | 0 |
| 650.5 | 295370 | 321860 | 142170 | 109   | 0 | 0 | 0 |
| 651.5 | 301670 | 321180 | 139040 | 89    | 0 | 0 | 0 |
| 652.5 | 307610 | 320800 | 135810 | 72    | 0 | 0 | 0 |
| 653.5 | 313110 | 320660 | 132480 | 58    | 0 | 0 | 0 |
| 654.5 | 318150 | 320710 | 129090 | 47    | 0 | 0 | 0 |
| 655.5 | 322660 | 320880 | 125630 | 38    | 0 | 0 | 0 |



|       |        |        |        |    |   |   |   |
|-------|--------|--------|--------|----|---|---|---|
| 656.5 | 326620 | 321100 | 122120 | 30 | 0 | 0 | 0 |
| 657.5 | 329970 | 321310 | 118570 | 24 | 0 | 0 | 0 |
| 658.5 | 332700 | 321440 | 114990 | 19 | 0 | 0 | 0 |
| 659.5 | 334780 | 321430 | 111400 | 15 | 0 | 0 | 0 |
| 660.5 | 336190 | 321230 | 107820 | 12 | 0 | 0 | 0 |
| 661.5 | 336900 | 320760 | 104250 | 9  | 0 | 0 | 0 |
| 662.5 | 336920 | 319980 | 100700 | 7  | 0 | 0 | 0 |
| 663.5 | 336240 | 318840 | 97200  | 6  | 0 | 0 | 0 |
| 664.5 | 334870 | 317300 | 93760  | 4  | 0 | 0 | 0 |
| 665.5 | 332810 | 315320 | 90380  | 3  | 0 | 0 | 0 |
| 666.5 | 330080 | 312850 | 87090  | 3  | 0 | 0 | 0 |
| 667.5 | 326700 | 309890 | 83900  | 2  | 0 | 0 | 0 |
| 668.5 | 322700 | 306400 | 80820  | 1  | 0 | 0 | 0 |
| 669.5 | 318100 | 302390 | 77870  | 1  | 0 | 0 | 0 |
| 670.5 | 312930 | 297830 | 75060  | 0  | 0 | 0 | 0 |
| 671.5 | 307250 | 292740 | 72400  | 0  | 0 | 0 | 0 |
| 672.5 | 301070 | 287110 | 69900  | 0  | 0 | 0 | 0 |
| 673.5 | 294450 | 280970 | 67590  | 0  | 0 | 0 | 0 |
| 674.5 | 287430 | 274340 | 65470  | 0  | 0 | 0 | 0 |
| 675.5 | 280050 | 267240 | 63550  | 0  | 0 | 0 | 0 |
| 676.5 | 272360 | 259700 | 61840  | 0  | 0 | 0 | 0 |
| 677.5 | 264400 | 251770 | 60350  | 0  | 0 | 0 | 0 |
| 678.5 | 256220 | 243470 | 59100  | 0  | 0 | 0 | 0 |
| 679.5 | 247870 | 234860 | 58080  | 0  | 0 | 0 | 0 |
| 680.5 | 239390 | 225980 | 57310  | 0  | 0 | 0 | 0 |
| 681.5 | 230820 | 216880 | 56790  | 0  | 0 | 0 | 0 |
| 682.5 | 222200 | 207600 | 56520  | 0  | 0 | 0 | 0 |
| 683.5 | 213570 | 198210 | 56500  | 0  | 0 | 0 | 0 |
| 684.5 | 204960 | 188750 | 56720  | 0  | 0 | 0 | 0 |
| 685.5 | 196420 | 179260 | 57200  | 0  | 0 | 0 | 0 |
| 686.5 | 187960 | 169810 | 57900  | 0  | 0 | 0 | 0 |
| 687.5 | 179630 | 160430 | 58840  | 0  | 0 | 0 | 0 |
| 688.5 | 171430 | 151160 | 59990  | 0  | 0 | 0 | 0 |
| 689.5 | 163410 | 142050 | 61330  | 0  | 0 | 0 | 0 |
| 690.5 | 155570 | 133140 | 62860  | 0  | 0 | 0 | 0 |
| 691.5 | 147940 | 124460 | 64550  | 0  | 0 | 0 | 0 |
| 692.5 | 140520 | 116030 | 66380  | 0  | 0 | 0 | 0 |
| 693.5 | 133340 | 107900 | 68310  | 0  | 0 | 0 | 0 |
| 694.5 | 126390 | 100070 | 70330  | 0  | 0 | 0 | 0 |
| 695.5 | 119700 | 92570  | 72400  | 0  | 0 | 0 | 0 |
| 696.5 | 113260 | 85410  | 74500  | 0  | 0 | 0 | 0 |
| 697.5 | 107080 | 78600  | 76580  | 0  | 0 | 0 | 0 |
| 698.5 | 101150 | 72150  | 78620  | 0  | 0 | 0 | 0 |
| 699.5 | 95490  | 66060  | 80580  | 0  | 0 | 0 | 0 |

|       |       |       |       |   |   |   |   |
|-------|-------|-------|-------|---|---|---|---|
| 700.5 | 90080 | 60340 | 82430 | 0 | 0 | 0 | 0 |
| 701.5 | 84930 | 54970 | 84140 | 0 | 0 | 0 | 0 |
| 702.5 | 80030 | 49960 | 85670 | 0 | 0 | 0 | 0 |
| 703.5 | 75370 | 45300 | 87000 | 0 | 0 | 0 | 0 |
| 704.5 | 70960 | 40980 | 88100 | 0 | 0 | 0 | 0 |
| 705.5 | 66780 | 36980 | 88950 | 0 | 0 | 0 | 0 |
| 706.5 | 62820 | 33300 | 89520 | 0 | 0 | 0 | 0 |
| 707.5 | 59090 | 29910 | 89810 | 0 | 0 | 0 | 0 |
| 708.5 | 55560 | 26810 | 89790 | 0 | 0 | 0 | 0 |
| 709.5 | 52240 | 23980 | 89460 | 0 | 0 | 0 | 0 |
| 710.5 | 49120 | 21410 | 88810 | 0 | 0 | 0 | 0 |
| 711.5 | 46180 | 19070 | 87850 | 0 | 0 | 0 | 0 |
| 712.5 | 43410 | 16950 | 86580 | 0 | 0 | 0 | 0 |
| 713.5 | 40820 | 15040 | 85010 | 0 | 0 | 0 | 0 |
| 714.5 | 38390 | 13320 | 83150 | 0 | 0 | 0 | 0 |
| 715.5 | 36110 | 11780 | 81010 | 0 | 0 | 0 | 0 |
| 716.5 | 33970 | 10390 | 78630 | 0 | 0 | 0 | 0 |
| 717.5 | 31970 | 9160  | 76020 | 0 | 0 | 0 | 0 |
| 718.5 | 30100 | 8060  | 73200 | 0 | 0 | 0 | 0 |
| 719.5 | 28350 | 7080  | 70210 | 0 | 0 | 0 | 0 |
| 720.5 | 26710 | 6210  | 67080 | 0 | 0 | 0 | 0 |
| 721.5 | 25190 | 5440  | 63820 | 0 | 0 | 0 | 0 |
| 722.5 | 23760 | 4770  | 60480 | 0 | 0 | 0 | 0 |
| 723.5 | 22430 | 4170  | 57080 | 0 | 0 | 0 | 0 |
| 724.5 | 21190 | 3650  | 53660 | 0 | 0 | 0 | 0 |
| 725.5 | 20030 | 3190  | 50230 | 0 | 0 | 0 | 0 |
| 726.5 | 18950 | 2790  | 46830 | 0 | 0 | 0 | 0 |
| 727.5 | 17940 | 2430  | 43490 | 0 | 0 | 0 | 0 |
| 728.5 | 17000 | 2130  | 40210 | 0 | 0 | 0 | 0 |
| 729.5 | 16130 | 1860  | 37030 | 0 | 0 | 0 | 0 |
| 730.5 | 15320 | 1630  | 33970 | 0 | 0 | 0 | 0 |
| 731.5 | 14560 | 1430  | 31020 | 0 | 0 | 0 | 0 |
| 732.5 | 13850 | 1260  | 28220 | 0 | 0 | 0 | 0 |
| 733.5 | 13190 | 1110  | 25560 | 0 | 0 | 0 | 0 |
| 734.5 | 12580 | 980   | 23060 | 0 | 0 | 0 | 0 |
| 735.5 | 12010 | 870   | 20720 | 0 | 0 | 0 | 0 |
| 736.5 | 11480 | 780   | 18540 | 0 | 0 | 0 | 0 |
| 737.5 | 10990 | 700   | 16510 | 0 | 0 | 0 | 0 |
| 738.5 | 10540 | 630   | 14650 | 0 | 0 | 0 | 0 |
| 739.5 | 10110 | 570   | 12950 | 0 | 0 | 0 | 0 |
| 740.5 | 9720  | 520   | 11390 | 0 | 0 | 0 | 0 |
| 741.5 | 9350  | 480   | 9990  | 0 | 0 | 0 | 0 |
| 742.5 | 9010  | 450   | 8720  | 0 | 0 | 0 | 0 |
| 743.5 | 8700  | 420   | 7580  | 0 | 0 | 0 | 0 |

|       |      |      |      |   |   |   |   |
|-------|------|------|------|---|---|---|---|
| 744.5 | 8410 | 400  | 6560 | 0 | 0 | 0 | 0 |
| 745.5 | 8140 | 380  | 5650 | 0 | 0 | 0 | 0 |
| 746.5 | 7890 | 370  | 4850 | 0 | 0 | 0 | 0 |
| 747.5 | 7670 | 360  | 4150 | 0 | 0 | 0 | 0 |
| 748.5 | 7460 | 360  | 3530 | 0 | 0 | 0 | 0 |
| 749.5 | 7270 | 360  | 2990 | 0 | 0 | 0 | 0 |
| 750.5 | 7090 | 360  | 2530 | 0 | 0 | 0 | 0 |
| 751.5 | 6930 | 360  | 2130 | 0 | 0 | 0 | 0 |
| 752.5 | 6790 | 370  | 1780 | 0 | 0 | 0 | 0 |
| 753.5 | 6660 | 370  | 1490 | 0 | 0 | 0 | 0 |
| 754.5 | 6540 | 380  | 1230 | 0 | 0 | 0 | 0 |
| 755.5 | 6440 | 400  | 1020 | 0 | 0 | 0 | 0 |
| 756.5 | 6350 | 410  | 840  | 0 | 0 | 0 | 0 |
| 757.5 | 6270 | 430  | 690  | 0 | 0 | 0 | 0 |
| 758.5 | 6200 | 450  | 560  | 0 | 0 | 0 | 0 |
| 759.5 | 6150 | 470  | 460  | 0 | 0 | 0 | 0 |
| 760.5 | 6100 | 500  | 370  | 0 | 0 | 0 | 0 |
| 761.5 | 6070 | 530  | 300  | 0 | 0 | 0 | 0 |
| 762.5 | 6050 | 560  | 240  | 0 | 0 | 0 | 0 |
| 763.5 | 6040 | 590  | 190  | 0 | 0 | 0 | 0 |
| 764.5 | 6040 | 630  | 150  | 0 | 0 | 0 | 0 |
| 765.5 | 6050 | 670  | 120  | 0 | 0 | 0 | 0 |
| 766.5 | 6070 | 720  | 100  | 0 | 0 | 0 | 0 |
| 767.5 | 6100 | 770  | 80   | 0 | 0 | 0 | 0 |
| 768.5 | 6140 | 820  | 60   | 0 | 0 | 0 | 0 |
| 769.5 | 6190 | 880  | 50   | 0 | 0 | 0 | 0 |
| 770.5 | 6250 | 950  | 40   | 0 | 0 | 0 | 0 |
| 771.5 | 6330 | 1020 | 30   | 0 | 0 | 0 | 0 |
| 772.5 | 6410 | 1100 | 20   | 0 | 0 | 0 | 0 |
| 773.5 | 6510 | 1190 | 20   | 0 | 0 | 0 | 0 |
| 774.5 | 6620 | 1280 | 10   | 0 | 0 | 0 | 0 |
| 775.5 | 6740 | 1380 | 10   | 0 | 0 | 0 | 0 |
| 776.5 | 6880 | 1500 | 0    | 0 | 0 | 0 | 0 |
| 777.5 | 7020 | 1620 | 0    | 0 | 0 | 0 | 0 |
| 778.5 | 7190 | 1760 | 0    | 0 | 0 | 0 | 0 |
| 779.5 | 7360 | 1910 | 0    | 0 | 0 | 0 | 0 |
| 780.5 | 7550 | 2070 | 0    | 0 | 0 | 0 | 0 |
| 781.5 | 7760 | 2250 | 0    | 0 | 0 | 0 | 0 |
| 782.5 | 7990 | 2440 | 0    | 0 | 0 | 0 | 0 |
| 783.5 | 8230 | 2650 | 0    | 0 | 0 | 0 | 0 |
| 784.5 | 8490 | 2890 | 0    | 0 | 0 | 0 | 0 |
| 785.5 | 8770 | 3140 | 0    | 0 | 0 | 0 | 0 |
| 786.5 | 9070 | 3420 | 0    | 0 | 0 | 0 | 0 |
| 787.5 | 9390 | 3730 | 0    | 0 | 0 | 0 | 0 |

|       |       |        |   |   |   |   |   |
|-------|-------|--------|---|---|---|---|---|
| 788.5 | 9730  | 4070   | 0 | 0 | 0 | 0 | 0 |
| 789.5 | 10100 | 4430   | 0 | 0 | 0 | 0 | 0 |
| 790.5 | 10490 | 4830   | 0 | 0 | 0 | 0 | 0 |
| 791.5 | 10910 | 5270   | 0 | 0 | 0 | 0 | 0 |
| 792.5 | 11360 | 5750   | 0 | 0 | 0 | 0 | 0 |
| 793.5 | 11840 | 6270   | 0 | 0 | 0 | 0 | 0 |
| 794.5 | 12350 | 6840   | 0 | 0 | 0 | 0 | 0 |
| 795.5 | 12890 | 7460   | 0 | 0 | 0 | 0 | 0 |
| 796.5 | 13460 | 8140   | 0 | 0 | 0 | 0 | 0 |
| 797.5 | 14080 | 8880   | 0 | 0 | 0 | 0 | 0 |
| 798.5 | 14730 | 9680   | 0 | 0 | 0 | 0 | 0 |
| 799.5 | 15420 | 10560  | 0 | 0 | 0 | 0 | 0 |
| 800.5 | 16150 | 11510  | 0 | 0 | 0 | 0 | 0 |
| 801.5 | 16930 | 12540  | 0 | 0 | 0 | 0 | 0 |
| 802.5 | 17750 | 13660  | 0 | 0 | 0 | 0 | 0 |
| 803.5 | 18630 | 14880  | 0 | 0 | 0 | 0 | 0 |
| 804.5 | 19550 | 16200  | 0 | 0 | 0 | 0 | 0 |
| 805.5 | 20530 | 17630  | 0 | 0 | 0 | 0 | 0 |
| 806.5 | 21570 | 19170  | 0 | 0 | 0 | 0 | 0 |
| 807.5 | 22660 | 20840  | 0 | 0 | 0 | 0 | 0 |
| 808.5 | 23820 | 22640  | 0 | 0 | 0 | 0 | 0 |
| 809.5 | 25040 | 24580  | 0 | 0 | 0 | 0 | 0 |
| 810.5 | 26320 | 26670  | 0 | 0 | 0 | 0 | 0 |
| 811.5 | 27670 | 28920  | 0 | 0 | 0 | 0 | 0 |
| 812.5 | 29090 | 31340  | 0 | 0 | 0 | 0 | 0 |
| 813.5 | 30590 | 33930  | 0 | 0 | 0 | 0 | 0 |
| 814.5 | 32160 | 36710  | 0 | 0 | 0 | 0 | 0 |
| 815.5 | 33800 | 39680  | 0 | 0 | 0 | 0 | 0 |
| 816.5 | 35530 | 42850  | 0 | 0 | 0 | 0 | 0 |
| 817.5 | 37330 | 46230  | 0 | 0 | 0 | 0 | 0 |
| 818.5 | 39220 | 49840  | 0 | 0 | 0 | 0 | 0 |
| 819.5 | 41180 | 53670  | 0 | 0 | 0 | 0 | 0 |
| 820.5 | 43230 | 57740  | 0 | 0 | 0 | 0 | 0 |
| 821.5 | 45360 | 62050  | 0 | 0 | 0 | 0 | 0 |
| 822.5 | 47580 | 66610  | 0 | 0 | 0 | 0 | 0 |
| 823.5 | 49870 | 71420  | 0 | 0 | 0 | 0 | 0 |
| 824.5 | 52250 | 76500  | 0 | 0 | 0 | 0 | 0 |
| 825.5 | 54710 | 81840  | 0 | 0 | 0 | 0 | 0 |
| 826.5 | 57240 | 87440  | 0 | 0 | 0 | 0 | 0 |
| 827.5 | 59850 | 93320  | 0 | 0 | 0 | 0 | 0 |
| 828.5 | 62530 | 99460  | 0 | 0 | 0 | 0 | 0 |
| 829.5 | 65270 | 105870 | 0 | 0 | 0 | 0 | 0 |
| 830.5 | 68080 | 112540 | 0 | 0 | 0 | 0 | 0 |
| 831.5 | 70950 | 119480 | 0 | 0 | 0 | 0 | 0 |

|       |        |        |   |   |   |   |   |
|-------|--------|--------|---|---|---|---|---|
| 832.5 | 73860  | 126660 | 0 | 0 | 0 | 0 | 0 |
| 833.5 | 76820  | 134090 | 0 | 0 | 0 | 0 | 0 |
| 834.5 | 79810  | 141740 | 0 | 0 | 0 | 0 | 0 |
| 835.5 | 82830  | 149620 | 0 | 0 | 0 | 0 | 0 |
| 836.5 | 85860  | 157700 | 0 | 0 | 0 | 0 | 0 |
| 837.5 | 88900  | 165970 | 0 | 0 | 0 | 0 | 0 |
| 838.5 | 91940  | 174410 | 0 | 0 | 0 | 0 | 0 |
| 839.5 | 94960  | 182990 | 0 | 0 | 0 | 0 | 0 |
| 840.5 | 97950  | 191690 | 0 | 0 | 0 | 0 | 0 |
| 841.5 | 100900 | 200480 | 0 | 0 | 0 | 0 | 0 |
| 842.5 | 103790 | 209340 | 0 | 0 | 0 | 0 | 0 |
| 843.5 | 106610 | 218230 | 0 | 0 | 0 | 0 | 0 |
| 844.5 | 109340 | 227120 | 0 | 0 | 0 | 0 | 0 |
| 845.5 | 111970 | 235980 | 0 | 0 | 0 | 0 | 0 |
| 846.5 | 114490 | 244770 | 0 | 0 | 0 | 0 | 0 |
| 847.5 | 116880 | 253450 | 0 | 0 | 0 | 0 | 0 |
| 848.5 | 119120 | 261990 | 0 | 0 | 0 | 0 | 0 |
| 849.5 | 121200 | 270340 | 0 | 0 | 0 | 0 | 0 |
| 850.5 | 123110 | 278470 | 0 | 0 | 0 | 0 | 0 |
| 851.5 | 124830 | 286330 | 0 | 0 | 0 | 0 | 0 |
| 852.5 | 126340 | 293890 | 0 | 0 | 0 | 0 | 0 |
| 853.5 | 127640 | 301100 | 0 | 0 | 0 | 0 | 0 |
| 854.5 | 128710 | 307930 | 0 | 0 | 0 | 0 | 0 |
| 855.5 | 129550 | 314340 | 0 | 0 | 0 | 0 | 0 |
| 856.5 | 130140 | 320280 | 0 | 0 | 0 | 0 | 0 |
| 857.5 | 130480 | 325740 | 0 | 0 | 0 | 0 | 0 |
| 858.5 | 130560 | 330670 | 0 | 0 | 0 | 0 | 0 |
| 859.5 | 130380 | 335040 | 0 | 0 | 0 | 0 | 0 |
| 860.5 | 129930 | 338820 | 0 | 0 | 0 | 0 | 0 |
| 861.5 | 129220 | 342000 | 0 | 0 | 0 | 0 | 0 |
| 862.5 | 128250 | 344550 | 0 | 0 | 0 | 0 | 0 |
| 863.5 | 127020 | 346450 | 0 | 0 | 0 | 0 | 0 |
| 864.5 | 125530 | 347690 | 0 | 0 | 0 | 0 | 0 |
| 865.5 | 123810 | 348260 | 0 | 0 | 0 | 0 | 0 |
| 866.5 | 121850 | 348150 | 0 | 0 | 0 | 0 | 0 |
| 867.5 | 119680 | 347370 | 0 | 0 | 0 | 0 | 0 |
| 868.5 | 117310 | 345900 | 0 | 0 | 0 | 0 | 0 |
| 869.5 | 114760 | 343770 | 0 | 0 | 0 | 0 | 0 |
| 870.5 | 112040 | 340980 | 0 | 0 | 0 | 0 | 0 |
| 871.5 | 109200 | 337540 | 0 | 0 | 0 | 0 | 0 |
| 872.5 | 106240 | 333470 | 0 | 0 | 0 | 0 | 0 |
| 873.5 | 103200 | 328800 | 0 | 0 | 0 | 0 | 0 |
| 874.5 | 100100 | 323550 | 0 | 0 | 0 | 0 | 0 |
| 875.5 | 96990  | 317750 | 0 | 0 | 0 | 0 | 0 |

|       |        |        |   |   |   |   |   |
|-------|--------|--------|---|---|---|---|---|
| 876.5 | 93890  | 311440 | 0 | 0 | 0 | 0 | 0 |
| 877.5 | 90840  | 304640 | 0 | 0 | 0 | 0 | 0 |
| 878.5 | 87870  | 297390 | 0 | 0 | 0 | 0 | 0 |
| 879.5 | 85020  | 289730 | 0 | 0 | 0 | 0 | 0 |
| 880.5 | 82320  | 281710 | 0 | 0 | 0 | 0 | 0 |
| 881.5 | 79810  | 273360 | 0 | 0 | 0 | 0 | 0 |
| 882.5 | 77520  | 264730 | 0 | 0 | 0 | 0 | 0 |
| 883.5 | 75490  | 255850 | 0 | 0 | 0 | 0 | 0 |
| 884.5 | 73740  | 246780 | 0 | 0 | 0 | 0 | 0 |
| 885.5 | 72310  | 237560 | 0 | 0 | 0 | 0 | 0 |
| 886.5 | 71210  | 228220 | 0 | 0 | 0 | 0 | 0 |
| 887.5 | 70460  | 218810 | 0 | 0 | 0 | 0 | 0 |
| 888.5 | 70090  | 209370 | 0 | 0 | 0 | 0 | 0 |
| 889.5 | 70090  | 199940 | 0 | 0 | 0 | 0 | 0 |
| 890.5 | 70470  | 190550 | 0 | 0 | 0 | 0 | 0 |
| 891.5 | 71230  | 181240 | 0 | 0 | 0 | 0 | 0 |
| 892.5 | 72360  | 172050 | 0 | 0 | 0 | 0 | 0 |
| 893.5 | 73830  | 163000 | 0 | 0 | 0 | 0 | 0 |
| 894.5 | 75630  | 154120 | 0 | 0 | 0 | 0 | 0 |
| 895.5 | 77720  | 145430 | 0 | 0 | 0 | 0 | 0 |
| 896.5 | 80060  | 136970 | 0 | 0 | 0 | 0 | 0 |
| 897.5 | 82620  | 128740 | 0 | 0 | 0 | 0 | 0 |
| 898.5 | 85330  | 120770 | 0 | 0 | 0 | 0 | 0 |
| 899.5 | 88150  | 113080 | 0 | 0 | 0 | 0 | 0 |
| 900.5 | 91010  | 105670 | 0 | 0 | 0 | 0 | 0 |
| 901.5 | 93850  | 98550  | 0 | 0 | 0 | 0 | 0 |
| 902.5 | 96620  | 91730  | 0 | 0 | 0 | 0 | 0 |
| 903.5 | 99240  | 85230  | 0 | 0 | 0 | 0 | 0 |
| 904.5 | 101660 | 79030  | 0 | 0 | 0 | 0 | 0 |
| 905.5 | 103820 | 73140  | 0 | 0 | 0 | 0 | 0 |
| 906.5 | 105660 | 67560  | 0 | 0 | 0 | 0 | 0 |
| 907.5 | 107130 | 62290  | 0 | 0 | 0 | 0 | 0 |
| 908.5 | 108200 | 57320  | 0 | 0 | 0 | 0 | 0 |
| 909.5 | 108820 | 52650  | 0 | 0 | 0 | 0 | 0 |
| 910.5 | 108980 | 48270  | 0 | 0 | 0 | 0 | 0 |
| 911.5 | 108640 | 44180  | 0 | 0 | 0 | 0 | 0 |
| 912.5 | 107810 | 40350  | 0 | 0 | 0 | 0 | 0 |
| 913.5 | 106480 | 36790  | 0 | 0 | 0 | 0 | 0 |
| 914.5 | 104670 | 33480  | 0 | 0 | 0 | 0 | 0 |
| 915.5 | 102380 | 30410  | 0 | 0 | 0 | 0 | 0 |
| 916.5 | 99660  | 27580  | 0 | 0 | 0 | 0 | 0 |
| 917.5 | 96530  | 24960  | 0 | 0 | 0 | 0 | 0 |
| 918.5 | 93020  | 22560  | 0 | 0 | 0 | 0 | 0 |
| 919.5 | 89200  | 20350  | 0 | 0 | 0 | 0 | 0 |

|       |       |       |   |   |   |   |   |
|-------|-------|-------|---|---|---|---|---|
| 920.5 | 85100 | 18320 | 0 | 0 | 0 | 0 | 0 |
| 921.5 | 80770 | 16470 | 0 | 0 | 0 | 0 | 0 |
| 922.5 | 76280 | 14780 | 0 | 0 | 0 | 0 | 0 |
| 923.5 | 71670 | 13240 | 0 | 0 | 0 | 0 | 0 |
| 924.5 | 66990 | 11840 | 0 | 0 | 0 | 0 | 0 |
| 925.5 | 62300 | 10570 | 0 | 0 | 0 | 0 | 0 |
| 926.5 | 57650 | 9430  | 0 | 0 | 0 | 0 | 0 |
| 927.5 | 53060 | 8390  | 0 | 0 | 0 | 0 | 0 |
| 928.5 | 48590 | 7460  | 0 | 0 | 0 | 0 | 0 |
| 929.5 | 44270 | 6630  | 0 | 0 | 0 | 0 | 0 |
| 930.5 | 40130 | 5880  | 0 | 0 | 0 | 0 | 0 |
| 931.5 | 36190 | 5210  | 0 | 0 | 0 | 0 | 0 |
| 932.5 | 32470 | 4610  | 0 | 0 | 0 | 0 | 0 |
| 933.5 | 28990 | 4080  | 0 | 0 | 0 | 0 | 0 |
| 934.5 | 25750 | 3610  | 0 | 0 | 0 | 0 | 0 |
| 935.5 | 22750 | 3200  | 0 | 0 | 0 | 0 | 0 |
| 936.5 | 20000 | 2840  | 0 | 0 | 0 | 0 | 0 |
| 937.5 | 17490 | 2520  | 0 | 0 | 0 | 0 | 0 |
| 938.5 | 15220 | 2250  | 0 | 0 | 0 | 0 | 0 |
| 939.5 | 13180 | 2020  | 0 | 0 | 0 | 0 | 0 |
| 940.5 | 11360 | 1830  | 0 | 0 | 0 | 0 | 0 |
| 941.5 | 9740  | 1670  | 0 | 0 | 0 | 0 | 0 |
| 942.5 | 8300  | 1550  | 0 | 0 | 0 | 0 | 0 |
| 943.5 | 7050  | 1460  | 0 | 0 | 0 | 0 | 0 |
| 944.5 | 5950  | 1400  | 0 | 0 | 0 | 0 | 0 |
| 945.5 | 5000  | 1390  | 0 | 0 | 0 | 0 | 0 |
| 946.5 | 4180  | 1410  | 0 | 0 | 0 | 0 | 0 |
| 947.5 | 3480  | 1480  | 0 | 0 | 0 | 0 | 0 |
| 948.5 | 2880  | 1600  | 0 | 0 | 0 | 0 | 0 |
| 949.5 | 2370  | 1790  | 0 | 0 | 0 | 0 | 0 |
| 950.5 | 1940  | 2050  | 0 | 0 | 0 | 0 | 0 |
| 951.5 | 1580  | 2400  | 0 | 0 | 0 | 0 | 0 |
| 952.5 | 1290  | 2870  | 0 | 0 | 0 | 0 | 0 |
| 953.5 | 1040  | 3490  | 0 | 0 | 0 | 0 | 0 |
| 954.5 | 830   | 4280  | 0 | 0 | 0 | 0 | 0 |
| 955.5 | 670   | 5290  | 0 | 0 | 0 | 0 | 0 |
| 956.5 | 530   | 6570  | 0 | 0 | 0 | 0 | 0 |
| 957.5 | 420   | 8180  | 0 | 0 | 0 | 0 | 0 |
| 958.5 | 330   | 10200 | 0 | 0 | 0 | 0 | 0 |
| 959.5 | 260   | 12710 | 0 | 0 | 0 | 0 | 0 |
| 960.5 | 200   | 15790 | 0 | 0 | 0 | 0 | 0 |
| 961.5 | 160   | 19570 | 0 | 0 | 0 | 0 | 0 |
| 962.5 | 120   | 24170 | 0 | 0 | 0 | 0 | 0 |
| 963.5 | 90    | 29710 | 0 | 0 | 0 | 0 | 0 |

|       |    |         |   |   |   |   |   |
|-------|----|---------|---|---|---|---|---|
| 964.5 | 70 | 36350   | 0 | 0 | 0 | 0 | 0 |
| 965.5 | 50 | 44230   | 0 | 0 | 0 | 0 | 0 |
| 966.5 | 40 | 53510   | 0 | 0 | 0 | 0 | 0 |
| 967.5 | 30 | 64360   | 0 | 0 | 0 | 0 | 0 |
| 968.5 | 20 | 76930   | 0 | 0 | 0 | 0 | 0 |
| 969.5 | 20 | 91370   | 0 | 0 | 0 | 0 | 0 |
| 970.5 | 10 | 107830  | 0 | 0 | 0 | 0 | 0 |
| 971.5 | 0  | 126430  | 0 | 0 | 0 | 0 | 0 |
| 972.5 | 0  | 147270  | 0 | 0 | 0 | 0 | 0 |
| 973.5 | 0  | 170430  | 0 | 0 | 0 | 0 | 0 |
| 974.5 | 0  | 195960  | 0 | 0 | 0 | 0 | 0 |
| 975.5 | 0  | 223900  | 0 | 0 | 0 | 0 | 0 |
| 976.5 | 0  | 254240  | 0 | 0 | 0 | 0 | 0 |
| 977.5 | 0  | 286970  | 0 | 0 | 0 | 0 | 0 |
| 978.5 | 0  | 322060  | 0 | 0 | 0 | 0 | 0 |
| 979.5 | 0  | 359480  | 0 | 0 | 0 | 0 | 0 |
| 980.5 | 0  | 399230  | 0 | 0 | 0 | 0 | 0 |
| 981.5 | 0  | 441360  | 0 | 0 | 0 | 0 | 0 |
| 982.5 | 0  | 485970  | 0 | 0 | 0 | 0 | 0 |
| 983.5 | 0  | 533300  | 0 | 0 | 0 | 0 | 0 |
| 984.5 | 0  | 583700  | 0 | 0 | 0 | 0 | 0 |
| 985.5 | 0  | 637750  | 0 | 0 | 0 | 0 | 0 |
| 986.5 | 0  | 696270  | 0 | 0 | 0 | 0 | 0 |
| 987.5 | 0  | 760430  | 0 | 0 | 0 | 0 | 0 |
| 988.5 | 0  | 831790  | 0 | 0 | 0 | 0 | 0 |
| 989.5 | 0  | 912450  | 0 | 0 | 0 | 0 | 0 |
| 990.5 | 0  | 1005160 | 0 | 0 | 0 | 0 | 0 |
| 991.5 | 0  | 1113500 | 0 | 0 | 0 | 0 | 0 |
| 992.5 | 0  | 1242070 | 0 | 0 | 0 | 0 | 0 |
| 993.5 | 0  | 1396770 | 0 | 0 | 0 | 0 | 0 |
| 994.5 | 0  | 1585150 | 0 | 0 | 0 | 0 | 0 |
| 995.5 | 0  | 1816890 | 0 | 0 | 0 | 0 | 0 |
| 996.5 | 0  | 2104340 | 0 | 0 | 0 | 0 | 0 |
| 997.5 | 0  | 2463330 | 0 | 0 | 0 | 0 | 0 |
| 998.5 | 0  | 2914140 | 0 | 0 | 0 | 0 | 0 |
| 999.5 | 0  | 3482830 | 0 | 0 | 0 | 0 | 0 |



The data displayed in Figures 2e-2i were computed and created by the manufacturer's proprietary program using the raw particle counting data. They were printed in summary reports by the program without numerical table of data display.

Table of supporting data for Figure 3a

Plasma treatment time

| 0 min.   |         | 15 min.  |         | 30 min.  |         | 45 min.  |            | 60 min.  |         | 120 min. |         |
|----------|---------|----------|---------|----------|---------|----------|------------|----------|---------|----------|---------|
| dw/dlogM | MW (Da)    | dw/dlogM | MW (Da) | dw/dlogM | MW (Da) |
| 0.053892 | 30917   | 0.037304 | 100641  | 0.127055 | 332164  | 0.00443  | 276472.00  | 3.31945  | 411850  | 1.94839  | 332291  |
| 0.064671 | 33562   | 0.087931 | 101502  | 0.239163 | 337652  | 0.00443  | 276472.00  | 3.31945  | 418960  | 2.0129   | 338154  |
| 0.074551 | 38351   | 0.135893 | 105021  | 0.38864  | 343232  | 0.110759 | 284590.00  | 3.32017  | 423838  | 2.07742  | 346131  |
| 0.086228 | 44276   | 0.19185  | 112429  | 0.523169 | 346056  | 0.23481  | 289335.00  | 3.32125  | 434204  | 2.16129  | 348155  |
| 0.093413 | 50078   | 0.242476 | 118326  | 0.657698 | 348903  | 0.376582 | 299063.00  | 3.32341  | 444823  | 2.23871  | 356368  |
| 0.107784 | 54923   | 0.293103 | 125598  | 0.859492 | 353218  | 0.536076 | 301546.00  | 3.31909  | 454785  | 2.30968  | 364775  |
| 0.117665 | 62119   | 0.351724 | 131064  | 0.994021 | 354668  | 0.664557 | 311685.00  | 3.31476  | 468258  | 2.34839  | 382189  |
| 0.13024  | 68129   | 0.394357 | 132186  | 1.13602  | 359054  | 0.793038 | 318195.00  | 3.30899  | 479468  | 2.34839  | 398107  |
| 0.142814 | 74721   | 0.444984 | 137938  | 1.27055  | 360528  | 0.925949 | 328894.00  | 3.30394  | 488728  | 2.35484  | 424471  |
| 0.158982 | 81113   | 0.484953 | 140309  | 1.46487  | 367990  | 1.01899  | 334377.00  | 3.29782  | 501942  | 2.39355  | 437025  |
| 0.17515  | 90805   | 0.53558  | 146416  | 1.65172  | 375606  | 1.14304  | 345621.00  | 3.29313  | 518376  | 2.45161  | 442150  |
| 0.189521 | 99590   | 0.583542 | 151492  | 1.83857  | 381813  | 1.25823  | 354300.00  | 3.2852   | 534540  | 2.55484  | 452581  |
| 0.202994 | 104833  | 0.631505 | 156744  | 2.03288  | 396155  | 1.36899  | 367730.00  | 3.28448  | 540764  | 2.63871  | 455227  |
| 0.22006  | 111490  | 0.682132 | 167800  | 2.16741  | 402701  | 1.46646  | 373862.00  | 3.27943  | 548716  | 2.70968  | 463258  |
| 0.236228 | 122277  | 0.727429 | 172144  | 2.33931  | 429984  | 1.58608  | 383251.00  | 3.27546  | 555945  | 2.76129  | 479748  |
| 0.250599 | 132738  | 0.791379 | 185864  | 2.51121  | 440685  | 1.75443  | 394503.00  | 3.26284  | 566681  | 2.69677  | 491065  |
| 0.267665 | 141167  | 0.839342 | 197286  | 2.713    | 446135  | 1.86519  | 402742.00  | 3.25419  | 575883  | 2.59355  | 499729  |
| 0.283832 | 156421  | 0.903292 | 202394  | 2.8849   | 455369  | 1.97595  | 412856.00  | 3.24626  | 584352  | 2.47742  | 511518  |
| 0.300000 | 169803  | 0.956583 | 211203  | 3.04185  | 457238  | 2.11772  | 426738.00  | 3.23544  | 592050  | 2.34839  | 523585  |
| 0.315269 | 182449  | 1.00987  | 218525  | 3.26607  | 470541  | 2.25063  | 432063.00  | 3.22607  | 602573  | 2.36129  | 539071  |
| 0.334132 | 192054  | 1.07116  | 226101  | 3.44544  | 478316  | 2.37911  | 442914.00  | 3.21597  | 611741  | 2.44516  | 581510  |
| 0.351198 | 202164  | 1.12179  | 233939  | 3.60239  | 492233  | 2.4943   | 452164.00  | 3.20263  | 622928  | 2.45806  | 602209  |
| 0.369162 | 224010  | 1.16442  | 242049  | 3.66966  | 502421  | 2.5962   | 461608.00  | 3.19686  | 631770  | 2.38065  | 627290  |
| 0.387126 | 235803  | 1.20705  | 252584  | 3.63976  | 517039  | 2.64051  | 473200.00  | 3.18496  | 647546  | 2.25161  | 645843  |
| 0.404192 | 248217  | 1.24969  | 259123  | 3.49776  | 538662  | 2.58734  | 495215.00  | 3.17415  | 661715  | 2.19355  | 661079  |
| 0.425749 | 272231  | 1.29498  | 268106  | 3.40807  | 549811  | 2.50316  | 513986.00  | 3.16874  | 672460  | 2.09677  | 688612  |
| 0.448204 | 289518  | 1.35094  | 284583  | 3.28849  | 570463  | 2.60506  | 542364.00  | 3.15828  | 687520  | 1.9871   | 717293  |
| 0.463473 | 307903  | 1.3989   | 302072  | 3.25859  | 596761  | 2.72911  | 565255.00  | 3.15323  | 700798  | 1.85161  | 734214  |
| 0.485928 | 330832  | 1.45219  | 307264  | 3.07175  | 626835  | 2.64051  | 596463.00  | 3.14638  | 713613  | 1.66452  | 782836  |
| 0.505689 | 344694  | 1.50282  | 337454  | 2.97459  | 637192  | 2.51646  | 608920.00  | 3.13809  | 729595  | 1.53548  | 810701  |
| 0.520958 | 374183  | 1.55345  | 358193  | 2.76532  | 669303  | 2.42785  | 624212.00  | 3.1298   | 738462  | 1.32903  | 839558  |
| 0.538024 | 410384  | 1.54013  | 396753  | 2.571    | 683156  | 2.30823  | 647873.00  | 3.11574  | 751966  | 1.16129  | 864388  |
| 0.550599 | 440946  | 1.58009  | 428373  | 2.36173  | 697295  | 2.2019   | 675217.00  | 3.10456  | 760723  | 0.948387 | 889953  |
| 0.561377 | 498725  | 1.56411  | 462514  | 2.13004  | 714649  | 2.08228  | 697921.00  | 3.08725  | 772298  | 0.780645 | 927019  |
| 0.565868 | 569893  | 1.55345  | 499376  | 1.86846  | 732434  | 1.98481  | 721388.00  | 3.07247  | 782078  | 0.645161 | 948889  |
| 0.551497 | 644569  | 1.50282  | 543789  | 1.6293   | 744537  | 1.91392  | 761216.00  | 3.05589  | 793978  | 0.432258 | 1000000 |
| 0.541617 | 699713  | 1.45486  | 562641  | 1.44245  | 782057  | 1.82532  | 780333.00  | 3.04363  | 811351  | 0.283871 | 1085030 |
| 0.531737 | 736549  | 1.38292  | 597218  | 1.25561  | 821468  | 1.68797  | 796630.00  | 3.03858  | 817912  | 0.245161 | 1130220 |
| 0.514671 | 791399  | 1.33762  | 623210  | 1.06876  | 852325  | 1.55063  | 820019.00  | 3.03642  | 829521  | 0.225807 | 1191100 |
| 0.501198 | 816140  | 1.25502  | 655898  | 0.881913 | 880724  | 1.36456  | 840613.00  |          |         | 0.187097 | 1233500 |
| 0.489521 | 867966  | 1.19373  | 667170  | 0.620329 | 895277  | 1.20063  | 858169.00  |          |         | 0.135484 | 1255260 |
| 0.46976  | 932603  | 1.1511   | 690300  | 0.418535 | 921325  | 1.08987  | 890698.00  |          |         | 0.064516 | 1262600 |
| 0.451796 | 951940  | 1.08981  | 696207  | 0.254111 | 932719  | 1.04114  | 916849.00  |          |         |          |         |
| 0.432934 | 1002050 | 0.996552 | 732723  | 0.119581 | 940393  | 1.01013  | 959504.00  |          |         |          |         |
| 0.41497  | 1076680 | 0.919279 | 758125  | 0.007474 | 959857  | 0.921519 | 971477.00  |          |         |          |         |
| 0.39521  | 1133360 | 0.847335 | 797889  |          |         | 0.731013 | 995875.00  |          |         |          |         |
| 0.380838 | 1205330 | 0.796708 | 804717  |          |         | 0.58038  | 1020880.00 |          |         |          |         |
| 0.361976 | 1405890 | 0.735423 | 832615  |          |         | 0.46519  | 1033620.00 |          |         |          |         |
| 0.347605 | 1726140 | 0.626176 | 868851  |          |         | 0.332278 | 1050860.00 |          |         |          |         |
| 0.350299 | 2013360 | 0.53558  | 891346  |          |         | 0.279114 | 1095210.00 |          |         |          |         |
| 0.347605 | 2656090 | 0.452978 | 898973  |          |         | 0.323418 | 1122710.00 |          |         |          |         |
| 0.340419 | 3162280 | 0.359718 | 938097  |          |         | 0.274684 | 1160460.00 |          |         |          |         |

|          |           |          |         |  |          |            |  |  |  |
|----------|-----------|----------|---------|--|----------|------------|--|--|--|
| 0.330539 | 3613530   | 0.213166 | 995749  |  | 0.203797 | 1179810.00 |  |  |  |
| 0.317964 | 4087030   | 0.117241 | 1030270 |  | 0.159494 | 1199480.00 |  |  |  |
| 0.30988  | 4528680   |          |         |  | 0.11519  | 1224540.00 |  |  |  |
| 0.301796 | 5228290   |          |         |  | 0.150633 | 1255290.00 |  |  |  |
| 0.299102 | 6098250   |          |         |  | 0.181646 | 1276220.00 |  |  |  |
| 0.288323 | 6968470   |          |         |  | 0.128481 | 1297500.00 |  |  |  |
| 0.282036 | 8296500   |          |         |  | 0.075317 | 1313690.00 |  |  |  |
| 0.26497  | 9578190   |          |         |  | 0.008861 | 1341120.00 |  |  |  |
| 0.260479 | 11287200  |          |         |  |          |            |  |  |  |
| 0.254192 | 12506900  |          |         |  |          |            |  |  |  |
| 0.247904 | 14001300  |          |         |  |          |            |  |  |  |
| 0.243413 | 16669600  |          |         |  |          |            |  |  |  |
| 0.230838 | 19244800  |          |         |  |          |            |  |  |  |
| 0.219162 | 21324400  |          |         |  |          |            |  |  |  |
| 0.214671 | 23387500  |          |         |  |          |            |  |  |  |
| 0.202096 | 27000500  |          |         |  |          |            |  |  |  |
| 0.181437 | 31171700  |          |         |  |          |            |  |  |  |
| 0.177844 | 34896400  |          |         |  |          |            |  |  |  |
| 0.16976  | 37112400  |          |         |  |          |            |  |  |  |
| 0.156287 | 41546900  |          |         |  |          |            |  |  |  |
| 0.139222 | 49974900  |          |         |  |          |            |  |  |  |
| 0.123952 | 57106400  |          |         |  |          |            |  |  |  |
| 0.117665 | 66608500  |          |         |  |          |            |  |  |  |
| 0.116766 | 74567400  |          |         |  |          |            |  |  |  |
| 0.104192 | 81781700  |          |         |  |          |            |  |  |  |
| 0.098802 | 97367400  |          |         |  |          |            |  |  |  |
| 0.099701 | 112409000 |          |         |  |          |            |  |  |  |

Table of supporting data for Figure 3b

| Plasma Treatment time |         |          |         |          |         |          |         |          |         |          |         |
|-----------------------|---------|----------|---------|----------|---------|----------|---------|----------|---------|----------|---------|
| 15 min.               |         | 30 min.  |         | 45 min.  |         | 60 min.  |         | 120 min. |         | 180 min. |         |
| dW/dlogM              | MW (Da) | dW/dlogM | MW (Da) | dW/dlogM | MW (Da) | dW/dlogM | MW (Da) | dW/dlogM | MW (Da) | dW/dlogM | MW (Da) |
| 1.1267                | 108     | 1.2707   | 100     | 1.3814   | 125     | 0.0029   | 56      | 1.0974   | 89      | 1.2223   | 96      |
| 1.1284                | 118     | 1.2707   | 100     | 1.3193   | 95      | 0.0431   | 56      | 1.1035   | 96      | 1.2475   | 106     |
| 1.1335                | 127     | 1.2796   | 112     | 1.3342   | 106     | 0.0737   | 56      | 1.1309   | 104     | 1.2836   | 116     |
| 1.1369                | 141     | 1.2885   | 123     | 1.3540   | 115     | 0.1082   | 56      | 1.1736   | 113     | 1.3431   | 127     |
| 1.1402                | 151     | 1.2997   | 138     | 1.4112   | 141     | 0.1389   | 57      | 1.2133   | 123     | 1.4170   | 149     |
| 1.1554                | 178     | 1.3175   | 154     | 1.4410   | 157     | 0.1877   | 58      | 1.2529   | 136     | 1.4783   | 165     |
| 1.1723                | 199     | 1.3175   | 154     | 1.4733   | 176     | 0.2270   | 58      | 1.2804   | 148     | 1.5432   | 176     |
| 1.1554                | 219     | 1.3175   | 168     | 1.5155   | 190     | 0.2662   | 59      | 1.3231   | 162     | 1.6063   | 193     |
| 1.1166                | 235     | 1.3309   | 179     | 1.5354   | 206     | 0.2978   | 58      | 1.3628   | 177     | 1.6315   | 204     |
| 1.0761                | 249     | 1.3443   | 195     | 1.4832   | 226     | 0.3428   | 58      | 1.4146   | 191     | 1.6333   | 214     |
| 1.0322                | 259     | 1.3287   | 215     | 1.4211   | 235     | 0.3879   | 59      | 1.4360   | 205     | 1.6063   | 225     |
| 0.9866                | 269     | 1.2819   | 225     | 1.3540   | 244     | 0.4290   | 59      | 1.4085   | 219     | 1.5702   | 229     |
| 0.9427                | 285     | 1.2373   | 238     | 1.2994   | 252     | 0.4721   | 61      | 1.3597   | 229     | 1.5342   | 234     |
| 0.8886                | 302     | 1.1771   | 250     | 1.2224   | 260     | 0.5085   | 61      | 1.2956   | 237     | 1.4729   | 241     |
| 0.8447                | 320     | 1.1191   | 258     | 1.1354   | 273     | 0.5449   | 61      | 1.2316   | 245     | 1.4044   | 252     |
| 0.8076                | 344     | 1.0678   | 268     | 1.0832   | 282     | 0.5851   | 61      | 1.1706   | 258     | 1.3358   | 258     |
| 0.7653                | 375     | 1.0143   | 279     | 1.0335   | 289     | 0.6139   | 63      | 1.1706   | 258     | 1.2818   | 266     |
| 0.7147                | 415     | 1.0143   | 279     | 0.9814   | 296     | 0.6445   | 64      | 1.1187   | 263     | 1.1988   | 279     |
| 0.6657                | 448     | 0.9564   | 291     | 0.9168   | 309     | 0.6876   | 64      | 1.0608   | 270     | 1.1087   | 285     |
| 0.6353                | 476     | 0.9185   | 301     | 0.8472   | 325     | 0.7173   | 67      | 0.9845   | 282     | 1.0059   | 301     |
| 0.5982                | 505     | 0.9185   | 301     | 0.7901   | 348     | 0.7489   | 73      | 0.9235   | 291     | 0.9392   | 316     |
| 0.5678                | 539     | 0.8672   | 318     | 0.7354   | 366     | 0.7364   | 85      | 0.8747   | 302     | 0.8527   | 332     |
| 0.5323                | 570     | 0.8182   | 335     | 0.6807   | 390     | 0.7345   | 97      | 0.8107   | 323     | 0.7337   | 368     |
| 0.5036                | 628     | 0.7736   | 352     | 0.6311   | 415     | 0.7527   | 113     | 0.7344   | 352     | 0.6400   | 399     |
| 0.4732                | 692     | 0.7223   | 375     | 0.5565   | 453     | 0.7786   | 126     | 0.6826   | 384     | 0.5138   | 471     |
| 0.4428                | 787     | 0.6710   | 398     | 0.5019   | 494     | 0.8035   | 141     | 0.6277   | 429     | 0.4453   | 515     |
| 0.4090                | 892     | 0.5997   | 431     | 0.4547   | 539     | 0.8236   | 161     | 0.5850   | 468     | 0.3732   | 600     |
| 0.3820                | 1039    | 0.5439   | 477     | 0.3950   | 607     | 0.8533   | 182     | 0.5240   | 519     | 0.3317   | 699     |
| 0.3634                | 1177    | 0.5061   | 510     | 0.3478   | 683     | 0.8743   | 201     | 0.4843   | 565     | 0.2812   | 840     |
| 0.3415                | 1452    | 0.4682   | 550     | 0.3106   | 760     | 0.8561   | 221     | 0.4508   | 616     | 0.2398   | 975     |
| 0.3229                | 1790    | 0.4414   | 596     | 0.2807   | 834     | 0.8255   | 239     | 0.4203   | 671     | 0.2073   | 1211    |
| 0.3026                | 2172    | 0.4102   | 643     | 0.2584   | 922     | 0.7824   | 251     | 0.3867   | 770     | 0.1821   | 1394    |
| 0.2891                | 2541    | 0.3857   | 688     | 0.2410   | 1032    | 0.7470   | 260     | 0.3532   | 892     |          |         |
| 0.2756                | 2891    | 0.3522   | 767     | 0.2236   | 1169    | 0.7125   | 269     | 0.3349   | 1014    |          |         |
| 0.2638                | 3263    | 0.3210   | 849     | 0.2012   | 1284    | 0.6637   | 283     | 0.3166   | 1205    |          |         |
| 0.2520                | 3727    | 0.3076   | 943     | 0.1764   | 1510    | 0.6292   | 303     | 0.3105   | 1407    |          |         |
| 0.2520                | 3742    | 0.2854   | 1065    |          |         | 0.5995   | 320     | 0.2922   | 1614    |          |         |
| 0.2351                | 4378    | 0.2697   | 1169    |          |         | 0.5689   | 341     |          |         |          |         |
|                       |         | 0.2697   | 1169    |          |         | 0.5440   | 367     |          |         |          |         |
|                       |         | 0.2519   | 1309    |          |         | 0.5152   | 408     |          |         |          |         |
|                       |         | 0.2385   | 1530    |          |         | 0.4798   | 457     |          |         |          |         |
|                       |         | 0.2118   | 1736    |          |         | 0.4578   | 495     |          |         |          |         |
|                       |         | 0.1962   | 2037    |          |         | 0.4396   | 532     |          |         |          |         |
|                       |         | 0.1783   | 2311    |          |         | 0.4252   | 579     |          |         |          |         |
|                       |         | 0.1672   | 2503    |          |         | 0.4080   | 647     |          |         |          |         |
|                       |         | 0.1516   | 2758    |          |         | 0.3888   | 750     |          |         |          |         |
|                       |         | 0.1360   | 3051    |          |         | 0.3697   | 903     |          |         |          |         |

|  |  |        |      |  |  |        |      |  |  |  |  |
|--|--|--------|------|--|--|--------|------|--|--|--|--|
|  |  | 0.1182 | 3506 |  |  | 0.3553 | 1093 |  |  |  |  |
|  |  |        |      |  |  | 0.3495 | 1334 |  |  |  |  |
|  |  |        |      |  |  | 0.3467 | 1712 |  |  |  |  |
|  |  |        |      |  |  | 0.3352 | 2225 |  |  |  |  |
|  |  |        |      |  |  | 0.3275 | 2647 |  |  |  |  |
|  |  |        |      |  |  | 0.3218 | 3530 |  |  |  |  |
|  |  |        |      |  |  | 0.3093 | 4399 |  |  |  |  |

The data displayed in Figures 3c and 3d were computed and created by the manufacturer's proprietary program using the raw spectroscopy data. They were printed in summary reports by the program without numerical table of data display.

Tables of supporting data for Figure 4a

| Ozonation treatment time (min) | Concentration of particles in ozonated solution (particles/mL) |          |
|--------------------------------|----------------------------------------------------------------|----------|
|                                | Average                                                        | $\sigma$ |
| 0                              | 6.86E+09                                                       | 5.79E+08 |
| 60                             | 5.35E+09                                                       | 6.14E+08 |
| 120                            | 3.99E+09                                                       | 2.83E+08 |
| 180                            | 4.01E+09                                                       | 1.47E+08 |

| Concentration of particles in DI water (particles/mL) |          |
|-------------------------------------------------------|----------|
| Average                                               | $\sigma$ |
| 8.24E+07                                              | 1.13E+07 |

Tables of supporting data for Figure 4b

| Ozonation time (0 hr)        |           | Ozonation time (1 hr)        |           | Ozonation time (2 hr)        |           | Ozonation time (3 hr)        |           |
|------------------------------|-----------|------------------------------|-----------|------------------------------|-----------|------------------------------|-----------|
| Concentration (particles/mL) | Size (nm) |
| 0                            | 2.50      | 0                            | 2.50      | 0                            | 2.50      | 0                            | 2.50      |
| 0                            | 4.68      | 0                            | 4.68      | 0                            | 4.68      | 0                            | 4.68      |
| 0                            | 4.86      | 0                            | 4.86      | 0                            | 4.86      | 0                            | 4.86      |
| 0                            | 5.03      | 0                            | 5.03      | 0                            | 5.03      | 0                            | 5.03      |
| 0                            | 5.22      | 0                            | 5.22      | 0                            | 5.22      | 0                            | 5.22      |
| 0                            | 5.41      | 0                            | 5.41      | 0                            | 5.41      | 0                            | 5.41      |
| 0                            | 5.61      | 0                            | 5.61      | 0                            | 5.61      | 0                            | 5.61      |
| 0                            | 5.81      | 0                            | 5.81      | 0                            | 5.81      | 0                            | 5.81      |
| 0                            | 6.03      | 0                            | 6.03      | 0                            | 6.03      | 0                            | 6.03      |
| 0                            | 6.25      | 0                            | 6.25      | 0                            | 6.25      | 0                            | 6.25      |
| 0                            | 6.47      | 0                            | 6.47      | 0                            | 6.47      | 0                            | 6.47      |
| 0                            | 6.71      | 0                            | 6.71      | 0                            | 6.71      | 0                            | 6.71      |
| 0                            | 6.96      | 0                            | 6.96      | 0                            | 6.96      | 0                            | 6.96      |
| 0                            | 7.21      | 0                            | 7.21      | 0                            | 7.21      | 0                            | 7.21      |
| 0                            | 7.48      | 0                            | 7.48      | 0                            | 7.48      | 0                            | 7.48      |
| 0                            | 7.50      | 0                            | 7.50      | 0                            | 7.50      | 0                            | 7.50      |
| 0                            | 7.75      | 0                            | 7.75      | 0                            | 7.75      | 0                            | 7.75      |
| 0                            | 8.03      | 0                            | 8.03      | 0                            | 8.03      | 0                            | 8.03      |
| 0                            | 8.33      | 0                            | 8.33      | 0                            | 8.33      | 0                            | 8.33      |
| 0                            | 8.63      | 227                          | 8.63      | 0                            | 8.63      | 0                            | 8.63      |
| 0                            | 8.95      | 2268                         | 8.95      | 0                            | 8.95      | 0                            | 8.95      |
| 0                            | 9.28      | 10204                        | 9.28      | 0                            | 9.28      | 0                            | 9.28      |
| 0                            | 9.62      | 27211                        | 9.62      | 0                            | 9.62      | 0                            | 9.62      |
| 0                            | 9.97      | 47619                        | 9.97      | 0                            | 9.97      | 0                            | 9.97      |
| 0                            | 10.34     | 57143                        | 10.34     | 0                            | 10.34     | 0                            | 10.34     |
| 430                          | 10.71     | 48073                        | 10.71     | 0                            | 10.71     | 0                            | 10.71     |
| 4297                         | 11.11     | 31745                        | 11.11     | 0                            | 11.11     | 0                            | 11.11     |
| 19336                        | 11.51     | 30607                        | 11.51     | 0                            | 11.51     | 0                            | 11.51     |
| 51992                        | 11.93     | 56675                        | 11.93     | 0                            | 11.93     | 0                            | 11.93     |
| 94531                        | 12.37     | 95667                        | 12.37     | 0                            | 12.37     | 0                            | 12.37     |
| 127617                       | 12.50     | 116524                       | 12.50     | 0                            | 12.50     | 0                            | 12.50     |
| 141797                       | 12.83     | 105418                       | 12.83     | 0                            | 12.83     | 0                            | 12.83     |
| 141797                       | 13.30     | 81619                        | 13.30     | 0                            | 13.30     | 0                            | 13.30     |
| 127617                       | 13.78     | 68022                        | 13.78     | 0                            | 13.78     | 0                            | 13.78     |
| 94531                        | 14.29     | 61677                        | 14.29     | 0                            | 14.29     | 0                            | 14.29     |
| 53711                        | 14.81     | 48299                        | 14.81     | 0                            | 14.81     | 271                          | 14.81     |
| 36953                        | 15.35     | 29479                        | 15.35     | 0                            | 15.35     | 2705                         | 15.35     |
| 85938                        | 15.92     | 20635                        | 15.92     | 0                            | 15.92     | 12443                        | 15.92     |
| 226874                       | 16.50     | 31746                        | 16.50     | 0                            | 16.50     | 35166                        | 16.50     |
| 421514                       | 17.10     | 58050                        | 17.10     | 0                            | 17.10     | 68980                        | 17.10     |



|         |       |         |       |         |       |         |       |
|---------|-------|---------|-------|---------|-------|---------|-------|
| 566284  | 17.50 | 84354   | 17.50 | 237     | 17.50 | 100629  | 17.50 |
| 591992  | 17.73 | 95238   | 17.73 | 2366    | 17.73 | 113884  | 17.73 |
| 532607  | 18.38 | 84354   | 18.38 | 10647   | 18.38 | 103334  | 18.38 |
| 459090  | 19.05 | 57823   | 19.05 | 29339   | 19.05 | 81423   | 19.05 |
| 420029  | 19.75 | 29479   | 19.75 | 59622   | 19.75 | 70332   | 19.75 |
| 488867  | 20.47 | 10431   | 20.47 | 106937  | 20.47 | 81423   | 20.47 |
| 752339  | 21.22 | 2268    | 21.22 | 184766  | 21.22 | 103334  | 21.22 |
| 1163580 | 22.00 | 454     | 22.00 | 286249  | 22.00 | 113884  | 22.00 |
| 1508630 | 22.50 | 2494    | 22.50 | 359107  | 22.50 | 100899  | 22.50 |
| 1623360 | 22.81 | 12472   | 22.81 | 348697  | 22.81 | 71685   | 22.81 |
| 1574370 | 23.64 | 39002   | 23.64 | 262826  | 23.64 | 47609   | 23.64 |
| 1574710 | 24.51 | 91377   | 24.51 | 158977  | 24.51 | 47609   | 24.51 |
| 1805540 | 25.41 | 183193  | 25.41 | 80438   | 25.41 | 71685   | 25.41 |
| 2287330 | 26.34 | 328723  | 26.34 | 34306   | 26.34 | 101170  | 26.34 |
| 2781850 | 27.30 | 506665  | 27.30 | 13486   | 27.30 | 116318  | 27.30 |
| 2912840 | 27.50 | 639053  | 27.50 | 13486   | 27.50 | 113612  | 27.50 |
| 2592100 | 28.30 | 657882  | 28.30 | 33360   | 28.30 | 109816  | 28.30 |
| 2238960 | 29.34 | 589213  | 29.34 | 71212   | 29.34 | 131152  | 29.34 |
| 2354590 | 30.41 | 521218  | 30.41 | 118997  | 30.41 | 190590  | 30.41 |
| 2920040 | 31.53 | 496967  | 31.53 | 162284  | 31.53 | 267858  | 31.53 |
| 3416930 | 32.50 | 487674  | 32.50 | 190671  | 32.50 | 322961  | 32.50 |
| 3452960 | 32.68 | 472257  | 32.68 | 215516  | 32.68 | 350463  | 32.68 |
| 3168620 | 33.88 | 496731  | 33.88 | 274428  | 33.88 | 413513  | 33.88 |
| 2937450 | 35.12 | 618680  | 35.12 | 397678  | 35.12 | 584977  | 35.12 |
| 2852270 | 36.41 | 803883  | 36.41 | 558771  | 36.41 | 834640  | 36.41 |
| 2714860 | 37.50 | 929475  | 37.50 | 687450  | 37.50 | 1013630 | 37.50 |
| 2461250 | 37.74 | 922688  | 37.74 | 760062  | 37.74 | 1006040 | 37.74 |
| 2347490 | 39.12 | 865364  | 39.12 | 842135  | 39.12 | 879638  | 39.12 |
| 2623780 | 40.56 | 910987  | 40.56 | 997317  | 40.56 | 816161  | 40.56 |
| 3177960 | 42.04 | 1108070 | 42.04 | 1196050 | 42.04 | 894571  | 42.04 |
| 3671260 | 42.50 | 1372700 | 42.50 | 1386300 | 42.50 | 1028280 | 42.50 |
| 3984150 | 43.58 | 1658830 | 43.58 | 1612250 | 43.58 | 1133660 | 43.58 |
| 4292380 | 45.18 | 2050090 | 45.18 | 1936800 | 45.18 | 1248950 | 45.18 |
| 4647580 | 46.83 | 2568250 | 46.83 | 2259180 | 46.83 | 1423190 | 46.83 |
| 4828750 | 47.50 | 2994340 | 47.50 | 2394210 | 47.50 | 1617430 | 47.50 |
| 4788950 | 48.55 | 3079730 | 48.55 | 2377180 | 48.55 | 1825880 | 48.55 |
| 4829480 | 50.33 | 2861850 | 50.33 | 2481790 | 50.33 | 2145620 | 50.33 |
| 5069010 | 52.17 | 2574450 | 52.17 | 2852570 | 52.17 | 2589460 | 52.17 |
| 5192780 | 52.50 | 2359640 | 52.50 | 3326000 | 52.50 | 3009450 | 52.50 |
| 4989740 | 54.08 | 2245020 | 54.08 | 3685850 | 54.08 | 3336750 | 54.08 |
| 4667900 | 56.07 | 2240310 | 56.07 | 3885770 | 56.07 | 3683630 | 56.07 |
| 4459310 | 57.50 | 2320120 | 57.50 | 4008340 | 57.50 | 4140000 | 57.50 |
| 4391820 | 58.12 | 2463590 | 58.12 | 4227450 | 58.12 | 4729550 | 58.12 |
| 4514420 | 60.25 | 2729960 | 60.25 | 4752190 | 60.25 | 5543720 | 60.25 |
| 4909260 | 62.46 | 3163240 | 62.46 | 5607150 | 62.46 | 6636070 | 62.46 |

|          |        |          |        |          |        |          |        |
|----------|--------|----------|--------|----------|--------|----------|--------|
| 5504000  | 62.50  | 3725990  | 62.50  | 6609940  | 62.50  | 7885330  | 62.50  |
| 6126660  | 64.74  | 4414550  | 64.74  | 7674440  | 64.74  | 9162400  | 64.74  |
| 6603560  | 67.12  | 5246160  | 67.12  | 8865970  | 67.12  | 10457500 | 67.12  |
| 6793360  | 67.50  | 6127630  | 67.50  | 10156100 | 67.50  | 11836000 | 67.50  |
| 6806570  | 69.57  | 6992740  | 69.57  | 11513000 | 69.57  | 13509200 | 69.57  |
| 7056930  | 72.12  | 7989100  | 72.12  | 13151800 | 72.12  | 15724500 | 72.12  |
| 7783670  | 72.50  | 9233070  | 72.50  | 15239100 | 72.50  | 18279200 | 72.50  |
| 8728670  | 74.76  | 10486800 | 74.76  | 17444000 | 74.76  | 20454300 | 74.76  |
| 9539370  | 77.50  | 11387800 | 77.50  | 19254900 | 77.50  | 21738600 | 77.50  |
| 10179900 | 77.50  | 11932000 | 77.50  | 20649900 | 77.50  | 22385900 | 77.50  |
| 10640300 | 80.34  | 12469400 | 80.34  | 21928800 | 80.34  | 23093300 | 80.34  |
| 10618900 | 82.50  | 13308900 | 82.50  | 23055500 | 82.50  | 24470500 | 82.50  |
| 9945730  | 83.29  | 14528500 | 83.29  | 23866500 | 83.29  | 26912400 | 83.29  |
| 9031170  | 86.34  | 15985300 | 86.34  | 24707600 | 86.34  | 30340200 | 86.34  |
| 8493100  | 87.50  | 17347600 | 87.50  | 26063400 | 87.50  | 33806800 | 87.50  |
| 8593230  | 89.50  | 18348200 | 89.50  | 27683700 | 89.50  | 35970400 | 89.50  |
| 9293990  | 92.50  | 19075200 | 92.50  | 28744100 | 92.50  | 36218200 | 92.50  |
| 10519100 | 92.78  | 19810500 | 92.78  | 28898300 | 92.78  | 35078100 | 92.78  |
| 11990400 | 96.18  | 20637500 | 96.18  | 28660700 | 96.18  | 33608200 | 96.18  |
| 13049200 | 97.50  | 21455000 | 97.50  | 28550000 | 97.50  | 32537200 | 97.50  |
| 13151900 | 99.70  | 22335200 | 99.70  | 28322400 | 99.70  | 31893800 | 99.70  |
| 12592500 | 102.50 | 23574200 | 102.50 | 27459100 | 102.50 | 31347200 | 102.50 |
| 12364100 | 103.40 | 25294900 | 103.40 | 26076900 | 103.40 | 30734800 | 103.40 |
| 13196500 | 107.10 | 27176900 | 107.10 | 24893400 | 107.10 | 30093000 | 107.10 |
| 14901000 | 107.50 | 28687900 | 107.50 | 24436500 | 107.50 | 29423400 | 107.50 |
| 16663700 | 111.10 | 29552900 | 111.10 | 24646700 | 111.10 | 28793900 | 111.10 |
| 17861800 | 112.50 | 30000000 | 112.50 | 25151600 | 112.50 | 28431800 | 112.50 |
| 18564000 | 115.10 | 30646800 | 115.10 | 25616300 | 115.10 | 28339100 | 115.10 |
| 19243600 | 117.50 | 32167700 | 117.50 | 25836100 | 117.50 | 28095100 | 117.50 |
| 20119200 | 119.30 | 34875600 | 119.30 | 25668300 | 119.30 | 27352300 | 119.30 |
| 21016800 | 122.50 | 38450400 | 122.50 | 24985200 | 122.50 | 26244500 | 122.50 |
| 21908200 | 123.70 | 42092500 | 123.70 | 23829400 | 123.70 | 25136700 | 123.70 |
| 23298900 | 127.50 | 45011700 | 127.50 | 22628300 | 127.50 | 24263200 | 127.50 |
| 25837700 | 128.30 | 46890000 | 128.30 | 22006500 | 128.30 | 23709800 | 128.30 |
| 29547300 | 132.50 | 48041100 | 132.50 | 22223500 | 132.50 | 23475000 | 132.50 |
| 33549500 | 133.00 | 49143700 | 133.00 | 22845700 | 133.00 | 23393000 | 133.00 |
| 36673800 | 137.50 | 50707300 | 137.50 | 23051900 | 137.50 | 23143800 | 137.50 |
| 38474600 | 137.80 | 52674300 | 137.80 | 22383600 | 137.80 | 22516800 | 137.80 |
| 39652100 | 142.50 | 54451400 | 142.50 | 21238100 | 142.50 | 21614000 | 142.50 |
| 41380400 | 142.90 | 55340900 | 142.90 | 20432400 | 142.90 | 20643900 | 142.90 |
| 44316000 | 147.50 | 55086100 | 147.50 | 20255900 | 147.50 | 19617800 | 147.50 |
| 48317200 | 148.10 | 54112800 | 148.10 | 20246300 | 148.10 | 18487100 | 148.10 |
| 52807700 | 152.50 | 53182200 | 152.50 | 19883500 | 152.50 | 17445500 | 152.50 |
| 57210600 | 153.50 | 52670000 | 153.50 | 19137300 | 153.50 | 16757300 | 153.50 |
| 61229600 | 157.50 | 52211800 | 157.50 | 18328500 | 157.50 | 16383800 | 157.50 |

|          |        |          |        |          |        |          |        |
|----------|--------|----------|--------|----------|--------|----------|--------|
| 64804800 | 159.20 | 51161600 | 159.20 | 17763600 | 159.20 | 16086700 | 159.20 |
| 67814700 | 162.50 | 49291000 | 162.50 | 17571100 | 162.50 | 15782900 | 162.50 |
| 70167900 | 165.00 | 46937100 | 165.00 | 17746800 | 165.00 | 15518200 | 165.00 |
| 72272400 | 167.50 | 44624200 | 167.50 | 18239000 | 167.50 | 15234500 | 167.50 |
| 74718300 | 171.00 | 42578400 | 171.00 | 18922700 | 171.00 | 14812100 | 171.00 |
| 77064500 | 172.50 | 40438200 | 172.50 | 19573900 | 172.50 | 14227100 | 172.50 |
| 77755900 | 177.30 | 37559300 | 177.30 | 20027200 | 177.30 | 13508700 | 177.30 |
| 76081000 | 177.50 | 33824200 | 177.50 | 20290900 | 177.50 | 12645700 | 177.50 |
| 73516400 | 182.50 | 29936400 | 182.50 | 20350600 | 182.50 | 11643700 | 182.50 |
| 72050700 | 183.80 | 26706400 | 183.80 | 19989300 | 183.80 | 10648700 | 183.80 |
| 71627100 | 187.50 | 24313000 | 187.50 | 19010200 | 187.50 | 9973790  | 187.50 |
| 70387800 | 190.50 | 22450700 | 190.50 | 17557100 | 190.50 | 9916410  | 190.50 |
| 67288500 | 192.50 | 20905100 | 192.50 | 16068300 | 192.50 | 10448200 | 192.50 |
| 63318800 | 197.50 | 19673100 | 197.50 | 14922800 | 197.50 | 11116700 | 197.50 |
| 59984100 | 197.50 | 18658500 | 197.50 | 14188600 | 197.50 | 11376700 | 197.50 |
| 57600500 | 202.50 | 17620300 | 202.50 | 13712700 | 202.50 | 11048700 | 202.50 |
| 55323200 | 204.70 | 16444700 | 204.70 | 13331700 | 204.70 | 10370700 | 204.70 |
| 52086200 | 207.50 | 15205200 | 207.50 | 12895200 | 207.50 | 9623530  | 207.50 |
| 47422000 | 212.20 | 13974500 | 212.20 | 12257100 | 212.20 | 8880950  | 212.20 |
| 41818100 | 212.50 | 12774000 | 212.50 | 11407300 | 212.50 | 8155020  | 212.50 |
| 36263200 | 217.50 | 11622100 | 217.50 | 10482600 | 217.50 | 7580420  | 217.50 |
| 31493600 | 220.00 | 10535200 | 220.00 | 9613400  | 220.00 | 7366210  | 220.00 |
| 27834700 | 222.50 | 9607140  | 222.50 | 8920970  | 222.50 | 7643010  | 222.50 |
| 25239000 | 227.50 | 9048200  | 227.50 | 8558370  | 227.50 | 8299350  | 227.50 |
| 23099900 | 228.10 | 8928650  | 228.10 | 8521550  | 228.10 | 8912420  | 228.10 |
| 20649800 | 232.50 | 8943630  | 232.50 | 8539880  | 232.50 | 9041700  | 232.50 |
| 17874000 | 236.40 | 8635970  | 236.40 | 8323590  | 236.40 | 8674150  | 236.40 |
| 15510400 | 237.50 | 7842200  | 237.50 | 7810480  | 237.50 | 8133490  | 237.50 |
| 13995300 | 242.50 | 6819710  | 242.50 | 7120030  | 242.50 | 7539100  | 242.50 |
| 12925000 | 245.10 | 5964660  | 245.10 | 6439070  | 245.10 | 6739750  | 245.10 |
| 11725600 | 247.50 | 5474160  | 247.50 | 5984470  | 247.50 | 5811330  | 247.50 |
| 10347500 | 252.50 | 5238810  | 252.50 | 5860990  | 252.50 | 5142720  | 252.50 |
| 9047040  | 254.10 | 5004360  | 254.10 | 5907570  | 254.10 | 4939540  | 254.10 |
| 7933270  | 257.50 | 4649350  | 257.50 | 5862620  | 257.50 | 5035560  | 257.50 |
| 6971080  | 262.50 | 4267160  | 262.50 | 5646420  | 262.50 | 5181500  | 262.50 |
| 6135620  | 263.40 | 3971320  | 263.40 | 5347390  | 263.40 | 5204800  | 263.40 |
| 5460070  | 267.50 | 3735730  | 267.50 | 5064870  | 267.50 | 4983830  | 267.50 |
| 5019570  | 272.50 | 3438700  | 272.50 | 4868410  | 272.50 | 4504350  | 272.50 |
| 4825480  | 273.00 | 2996610  | 273.00 | 4788800  | 273.00 | 3909270  | 273.00 |
| 4759770  | 277.50 | 2480200  | 277.50 | 4778100  | 277.50 | 3424850  | 277.50 |
| 4659740  | 282.50 | 2083280  | 282.50 | 4694640  | 282.50 | 3212510  | 282.50 |
| 4424600  | 283.00 | 1933880  | 283.00 | 4387480  | 283.00 | 3248540  | 283.00 |
| 4056680  | 287.50 | 1988920  | 287.50 | 3873820  | 287.50 | 3368180  | 287.50 |
| 3620220  | 292.50 | 2099010  | 292.50 | 3347330  | 292.50 | 3438370  | 292.50 |
| 3165920  | 293.40 | 2114380  | 293.40 | 2940450  | 293.40 | 3468900  | 293.40 |

|         |        |         |        |         |        |         |        |
|---------|--------|---------|--------|---------|--------|---------|--------|
| 2751570 | 297.50 | 1991510 | 297.50 | 2627140 | 297.50 | 3557320 | 297.50 |
| 2496260 | 302.50 | 1828540 | 302.50 | 2375290 | 302.50 | 3684760 | 302.50 |
| 2522050 | 304.10 | 1736510 | 304.10 | 2215030 | 304.10 | 3620140 | 304.10 |
| 2838810 | 307.50 | 1709280 | 307.50 | 2156330 | 307.50 | 3193990 | 307.50 |
| 3278740 | 312.50 | 1669120 | 312.50 | 2146180 | 312.50 | 2592790 | 312.50 |
| 3582720 | 315.30 | 1584340 | 315.30 | 2113790 | 315.30 | 2184370 | 315.30 |
| 3635760 | 317.50 | 1499140 | 317.50 | 2048270 | 317.50 | 2132180 | 317.50 |
| 3538680 | 322.50 | 1473800 | 322.50 | 2002860 | 322.50 | 2305320 | 322.50 |
| 3398070 | 326.80 | 1539580 | 326.80 | 2000730 | 326.80 | 2469150 | 326.80 |
| 3211040 | 327.50 | 1712990 | 327.50 | 2017060 | 327.50 | 2486410 | 327.50 |
| 2969190 | 332.50 | 1970000 | 332.50 | 2054920 | 332.50 | 2375740 | 332.50 |
| 2689670 | 337.50 | 2180740 | 337.50 | 2118790 | 337.50 | 2215720 | 337.50 |
| 2369310 | 338.80 | 2194740 | 338.80 | 2156370 | 338.80 | 2043200 | 338.80 |
| 2037120 | 342.50 | 2024250 | 342.50 | 2138590 | 342.50 | 1866630 | 342.50 |
| 1758260 | 347.50 | 1810950 | 347.50 | 2097410 | 347.50 | 1699770 | 347.50 |
| 1504010 | 351.20 | 1625310 | 351.20 | 2016510 | 351.20 | 1556520 | 351.20 |
| 1160850 | 352.50 | 1460060 | 352.50 | 1836280 | 352.50 | 1488840 | 352.50 |
| 727837  | 357.50 | 1366890 | 357.50 | 1594320 | 357.50 | 1582140 | 357.50 |
| 368661  | 362.50 | 1406130 | 362.50 | 1402540 | 362.50 | 1799890 | 362.50 |
| 238045  | 364.10 | 1502960 | 364.10 | 1298280 | 364.10 | 1933780 | 364.10 |
| 345028  | 367.50 | 1511850 | 367.50 | 1243430 | 367.50 | 1836180 | 367.50 |
| 572290  | 372.50 | 1386950 | 372.50 | 1212670 | 372.50 | 1582920 | 372.50 |
| 781869  | 377.40 | 1203990 | 377.40 | 1188500 | 377.40 | 1329370 | 377.40 |
| 929511  | 377.50 | 1079730 | 377.50 | 1136630 | 377.50 | 1156130 | 377.50 |
| 1070280 | 382.50 | 1101270 | 382.50 | 1040290 | 382.50 | 1084320 | 382.50 |
| 1227860 | 387.50 | 1239130 | 387.50 | 912985  | 387.50 | 1084750 | 387.50 |
| 1333530 | 391.20 | 1329590 | 391.20 | 787629  | 391.20 | 1075460 | 391.20 |
| 1345590 | 392.50 | 1237520 | 392.50 | 733048  | 392.50 | 1025150 | 392.50 |
| 1321170 | 397.50 | 1006680 | 397.50 | 818292  | 397.50 | 1007290 | 397.50 |
| 1292910 | 402.50 | 773348  | 402.50 | 1003350 | 402.50 | 1076050 | 402.50 |
| 1188570 | 405.60 | 601483  | 405.60 | 1142950 | 405.60 | 1180800 | 405.60 |
| 962586  | 407.50 | 485629  | 407.50 | 1158540 | 407.50 | 1261230 | 407.50 |
| 703495  | 412.50 | 440290  | 412.50 | 1117590 | 412.50 | 1318830 | 412.50 |
| 526473  | 417.50 | 491086  | 417.50 | 1087760 | 417.50 | 1343230 | 417.50 |
| 447864  | 420.40 | 620333  | 420.40 | 1025530 | 420.40 | 1276130 | 420.40 |
| 427280  | 422.50 | 789932  | 422.50 | 880512  | 422.50 | 1107750 | 422.50 |
| 444062  | 427.50 | 979691  | 427.50 | 701426  | 427.50 | 923521  | 427.50 |
| 473696  | 432.50 | 1149250 | 432.50 | 559719  | 432.50 | 800714  | 432.50 |
| 462088  | 435.80 | 1212710 | 435.80 | 456578  | 435.80 | 730503  | 435.80 |
| 383935  | 437.50 | 1122010 | 437.50 | 374730  | 437.50 | 690314  | 437.50 |
| 288203  | 442.50 | 939048  | 442.50 | 345636  | 442.50 | 711153  | 442.50 |
| 241440  | 447.50 | 759494  | 447.50 | 394133  | 447.50 | 800312  | 447.50 |
| 252217  | 451.80 | 603747  | 451.80 | 465340  | 451.80 | 863487  | 451.80 |
| 292615  | 452.50 | 441881  | 452.50 | 472201  | 452.50 | 794177  | 452.50 |
| 369951  | 457.50 | 281372  | 457.50 | 398393  | 457.50 | 610960  | 457.50 |

|        |        |        |        |        |        |        |        |
|--------|--------|--------|--------|--------|--------|--------|--------|
| 514722 | 462.50 | 168696 | 462.50 | 310150 | 462.50 | 432957 | 462.50 |
| 690820 | 467.50 | 126528 | 467.50 | 276786 | 467.50 | 334532 | 467.50 |
| 783545 | 468.30 | 130839 | 468.30 | 316517 | 468.30 | 284005 | 468.30 |
| 719480 | 472.50 | 144671 | 472.50 | 410414 | 472.50 | 220248 | 472.50 |
| 551943 | 477.50 | 149887 | 477.50 | 519202 | 477.50 | 134324 | 477.50 |
| 383594 | 482.50 | 142404 | 482.50 | 576652 | 482.50 | 60008  | 482.50 |
| 254761 | 485.50 | 119955 | 485.50 | 522229 | 485.50 | 23784  | 485.50 |
| 152100 | 487.50 | 92289  | 487.50 | 375580 | 487.50 | 32947  | 487.50 |
| 71757  | 492.50 | 87977  | 492.50 | 241725 | 492.50 | 89377  | 492.50 |
| 23633  | 497.50 | 129690 | 497.50 | 208877 | 497.50 | 178483 | 497.50 |
| 4727   | 502.50 | 208359 | 502.50 | 263070 | 502.50 | 253014 | 502.50 |
| 430    | 503.30 | 298364 | 503.30 | 323403 | 503.30 | 269776 | 503.30 |
| 0      | 507.50 | 392908 | 507.50 | 338784 | 507.50 | 247688 | 507.50 |
| 0      | 512.50 | 497438 | 512.50 | 322223 | 512.50 | 248579 | 512.50 |
| 0      | 517.50 | 582481 | 517.50 | 300217 | 517.50 | 292387 | 517.50 |
| 0      | 521.70 | 582274 | 521.70 | 270404 | 521.70 | 332620 | 521.70 |
| 0      | 522.50 | 468009 | 522.50 | 229472 | 522.50 | 325270 | 522.50 |
| 0      | 527.50 | 293191 | 527.50 | 208649 | 527.50 | 287674 | 527.50 |
| 0      | 532.50 | 141495 | 532.50 | 239160 | 532.50 | 277131 | 532.50 |
| 0      | 537.50 | 56008  | 537.50 | 294514 | 537.50 | 323078 | 537.50 |
| 430    | 540.80 | 35142  | 540.80 | 309657 | 540.80 | 387683 | 540.80 |
| 4727   | 542.50 | 66198  | 542.50 | 258330 | 542.50 | 403678 | 542.50 |
| 23633  | 547.50 | 138746 | 547.50 | 179088 | 547.50 | 348361 | 547.50 |
| 70898  | 552.50 | 235558 | 552.50 | 125392 | 552.50 | 258715 | 552.50 |
| 141797 | 557.50 | 323081 | 557.50 | 114041 | 557.50 | 178481 | 557.50 |
| 198516 | 560.70 | 358007 | 560.70 | 120903 | 560.70 | 119013 | 560.70 |
| 198516 | 562.50 | 318111 | 562.50 | 114042 | 562.50 | 72225  | 562.50 |
| 141797 | 567.50 | 230597 | 567.50 | 88962  | 567.50 | 35437  | 567.50 |
| 70898  | 572.50 | 153736 | 572.50 | 67668  | 572.50 | 12443  | 572.50 |
| 23633  | 577.50 | 123582 | 577.50 | 65539  | 577.50 | 2705   | 577.50 |
| 5156   | 581.20 | 128345 | 581.20 | 77604  | 581.20 | 271    | 581.20 |
| 5585   | 582.50 | 134694 | 582.50 | 100077 | 582.50 | 0      | 582.50 |
| 28350  | 587.50 | 124944 | 587.50 | 139580 | 587.50 | 0      | 587.50 |
| 94487  | 592.50 | 104762 | 592.50 | 190908 | 592.50 | 0      | 592.50 |
| 212578 | 597.50 | 87529  | 597.50 | 228040 | 597.50 | 0      | 597.50 |
| 340107 | 602.50 | 79592  | 602.50 | 227325 | 602.50 | 0      | 602.50 |
| 397215 | 602.50 | 78231  | 602.50 | 186635 | 602.50 | 271    | 602.50 |
| 344834 | 607.50 | 81632  | 607.50 | 123003 | 607.50 | 2705   | 607.50 |
| 236211 | 612.50 | 95687  | 612.50 | 61738  | 612.50 | 12173  | 612.50 |
| 165386 | 617.50 | 124022 | 617.50 | 21762  | 617.50 | 32731  | 617.50 |
| 170146 | 622.50 | 155304 | 622.50 | 4731   | 622.50 | 59512  | 622.50 |
| 203671 | 624.60 | 168905 | 624.60 | 473    | 624.60 | 80341  | 624.60 |
| 198945 | 627.50 | 153037 | 627.50 | 0      | 627.50 | 89268  | 627.50 |
| 141797 | 632.50 | 113818 | 632.50 | 0      | 632.50 | 89268  | 632.50 |
| 70898  | 637.50 | 68249  | 637.50 | 0      | 637.50 | 80611  | 637.50 |

|        |        |        |        |       |        |        |        |
|--------|--------|--------|--------|-------|--------|--------|--------|
| 23633  | 642.50 | 31745  | 642.50 | 0     | 642.50 | 62217  | 642.50 |
| 5156   | 647.40 | 10658  | 647.40 | 0     | 647.40 | 44904  | 647.40 |
| 5156   | 647.50 | 2494   | 647.50 | 0     | 647.50 | 45174  | 647.50 |
| 23633  | 652.50 | 2721   | 652.50 | 0     | 652.50 | 64912  | 652.50 |
| 70898  | 657.50 | 12472  | 657.50 | 0     | 657.50 | 93011  | 657.50 |
| 141797 | 662.50 | 37415  | 662.50 | 0     | 662.50 | 124316 | 662.50 |
| 198945 | 667.50 | 74830  | 667.50 | 0     | 667.50 | 158042 | 667.50 |
| 202813 | 671.20 | 104762 | 671.20 | 0     | 671.20 | 180724 | 671.20 |
| 161563 | 672.50 | 104762 | 672.50 | 0     | 672.50 | 173190 | 672.50 |
| 126758 | 677.50 | 74830  | 677.50 | 0     | 677.50 | 136219 | 677.50 |
| 133203 | 682.50 | 37415  | 682.50 | 0     | 682.50 | 95986  | 682.50 |
| 164570 | 687.50 | 12472  | 687.50 | 0     | 687.50 | 82495  | 687.50 |
| 180898 | 692.50 | 2494   | 692.50 | 0     | 692.50 | 101980 | 692.50 |
| 159844 | 695.70 | 227    | 695.70 | 0     | 695.70 | 127680 | 695.70 |
| 109570 | 697.50 | 0      | 697.50 | 237   | 697.50 | 125245 | 697.50 |
| 55859  | 702.50 | 0      | 702.50 | 2366  | 702.50 | 89268  | 702.50 |
| 19766  | 707.50 | 0      | 707.50 | 10647 | 707.50 | 44634  | 707.50 |
| 4297   | 712.50 | 0      | 712.50 | 28629 | 712.50 | 14878  | 712.50 |
| 430    | 717.50 | 0      | 717.50 | 52052 | 717.50 | 2976   | 717.50 |
| 0      | 721.20 | 0      | 721.20 | 70271 | 721.20 | 271    | 721.20 |
| 0      | 722.50 | 0      | 722.50 | 78079 | 722.50 | 0      | 722.50 |
| 0      | 727.50 | 0      | 727.50 | 78079 | 727.50 | 0      | 727.50 |
| 0      | 732.50 | 0      | 732.50 | 70271 | 732.50 | 0      | 732.50 |
| 0      | 737.50 | 0      | 737.50 | 52052 | 737.50 | 0      | 737.50 |
| 0      | 742.50 | 0      | 742.50 | 28629 | 742.50 | 0      | 742.50 |
| 0      | 747.50 | 0      | 747.50 | 10647 | 747.50 | 0      | 747.50 |
| 0      | 747.60 | 0      | 747.60 | 2366  | 747.60 | 0      | 747.60 |
| 0      | 752.50 | 227    | 752.50 | 473   | 752.50 | 0      | 752.50 |
| 0      | 757.50 | 2494   | 757.50 | 2366  | 757.50 | 0      | 757.50 |
| 0      | 762.50 | 12472  | 762.50 | 10884 | 762.50 | 0      | 762.50 |
| 0      | 767.50 | 37415  | 767.50 | 30758 | 767.50 | 0      | 767.50 |
| 0      | 772.50 | 74830  | 772.50 | 60333 | 772.50 | 0      | 772.50 |
| 0      | 775.00 | 104762 | 775.00 | 88016 | 775.00 | 0      | 775.00 |
| 0      | 777.50 | 104762 | 777.50 | 99373 | 777.50 | 0      | 777.50 |
| 0      | 782.50 | 74830  | 782.50 | 88016 | 782.50 | 0      | 782.50 |
| 0      | 787.50 | 37415  | 787.50 | 60333 | 787.50 | 0      | 787.50 |
| 0      | 792.50 | 12472  | 792.50 | 30758 | 792.50 | 0      | 792.50 |
| 0      | 797.50 | 2494   | 797.50 | 10884 | 797.50 | 0      | 797.50 |
| 0      | 802.50 | 227    | 802.50 | 2366  | 802.50 | 0      | 802.50 |
| 0      | 803.40 | 0      | 803.40 | 237   | 803.40 | 0      | 803.40 |
| 0      | 807.50 | 0      | 807.50 | 0     | 807.50 | 0      | 807.50 |
| 0      | 812.50 | 0      | 812.50 | 0     | 812.50 | 0      | 812.50 |
| 0      | 817.50 | 0      | 817.50 | 0     | 817.50 | 0      | 817.50 |
| 0      | 822.50 | 0      | 822.50 | 0     | 822.50 | 0      | 822.50 |
| 0      | 827.50 | 0      | 827.50 | 0     | 827.50 | 0      | 827.50 |

|   |        |   |        |   |        |   |        |
|---|--------|---|--------|---|--------|---|--------|
| 0 | 832.50 | 0 | 832.50 | 0 | 832.50 | 0 | 832.50 |
| 0 | 832.90 | 0 | 832.90 | 0 | 832.90 | 0 | 832.90 |
| 0 | 837.50 | 0 | 837.50 | 0 | 837.50 | 0 | 837.50 |
| 0 | 842.50 | 0 | 842.50 | 0 | 842.50 | 0 | 842.50 |
| 0 | 847.50 | 0 | 847.50 | 0 | 847.50 | 0 | 847.50 |
| 0 | 852.50 | 0 | 852.50 | 0 | 852.50 | 0 | 852.50 |
| 0 | 857.50 | 0 | 857.50 | 0 | 857.50 | 0 | 857.50 |
| 0 | 862.50 | 0 | 862.50 | 0 | 862.50 | 0 | 862.50 |
| 0 | 863.40 | 0 | 863.40 | 0 | 863.40 | 0 | 863.40 |
| 0 | 867.50 | 0 | 867.50 | 0 | 867.50 | 0 | 867.50 |
| 0 | 872.50 | 0 | 872.50 | 0 | 872.50 | 0 | 872.50 |
| 0 | 877.50 | 0 | 877.50 | 0 | 877.50 | 0 | 877.50 |
| 0 | 882.50 | 0 | 882.50 | 0 | 882.50 | 0 | 882.50 |
| 0 | 887.50 | 0 | 887.50 | 0 | 887.50 | 0 | 887.50 |
| 0 | 892.50 | 0 | 892.50 | 0 | 892.50 | 0 | 892.50 |
| 0 | 895.00 | 0 | 895.00 | 0 | 895.00 | 0 | 895.00 |
| 0 | 897.50 | 0 | 897.50 | 0 | 897.50 | 0 | 897.50 |
| 0 | 902.50 | 0 | 902.50 | 0 | 902.50 | 0 | 902.50 |
| 0 | 907.50 | 0 | 907.50 | 0 | 907.50 | 0 | 907.50 |
| 0 | 912.50 | 0 | 912.50 | 0 | 912.50 | 0 | 912.50 |
| 0 | 917.50 | 0 | 917.50 | 0 | 917.50 | 0 | 917.50 |
| 0 | 922.50 | 0 | 922.50 | 0 | 922.50 | 0 | 922.50 |
| 0 | 927.50 | 0 | 927.50 | 0 | 927.50 | 0 | 927.50 |
| 0 | 927.80 | 0 | 927.80 | 0 | 927.80 | 0 | 927.80 |
| 0 | 932.50 | 0 | 932.50 | 0 | 932.50 | 0 | 932.50 |
| 0 | 937.50 | 0 | 937.50 | 0 | 937.50 | 0 | 937.50 |
| 0 | 942.50 | 0 | 942.50 | 0 | 942.50 | 0 | 942.50 |
| 0 | 947.50 | 0 | 947.50 | 0 | 947.50 | 0 | 947.50 |
| 0 | 952.50 | 0 | 952.50 | 0 | 952.50 | 0 | 952.50 |
| 0 | 957.50 | 0 | 957.50 | 0 | 957.50 | 0 | 957.50 |
| 0 | 961.80 | 0 | 961.80 | 0 | 961.80 | 0 | 961.80 |
| 0 | 962.50 | 0 | 962.50 | 0 | 962.50 | 0 | 962.50 |
| 0 | 967.50 | 0 | 967.50 | 0 | 967.50 | 0 | 967.50 |
| 0 | 972.50 | 0 | 972.50 | 0 | 972.50 | 0 | 972.50 |
| 0 | 977.50 | 0 | 977.50 | 0 | 977.50 | 0 | 977.50 |
| 0 | 982.50 | 0 | 982.50 | 0 | 982.50 | 0 | 982.50 |
| 0 | 987.50 | 0 | 987.50 | 0 | 987.50 | 0 | 987.50 |
| 0 | 992.50 | 0 | 992.50 | 0 | 992.50 | 0 | 992.50 |
| 0 | 997.00 | 0 | 997.00 | 0 | 997.00 | 0 | 997.00 |
| 0 | 997.50 | 0 | 997.50 | 0 | 997.50 | 0 | 997.50 |

The data displayed in Figures 2e-2i were computed and created by the manufacturer's proprietary program using the raw particle counting data. They were printed in summary reports by the program without numerical table of data display.



**Table of supporting data for Figure S2a**

| Applied Voltage (kV) | Current (A) | Operation Time ( $\mu$ s) |
|----------------------|-------------|---------------------------|
| -5.36804             | -0.00503856 | -119.834                  |
| -5.34897             | -0.00502941 | -119.734                  |
| -5.35888             | -0.00480663 | -119.635                  |
| -5.36346             | -0.00474865 | -119.536                  |
| -5.35965             | -0.00435497 | -119.437                  |
| -5.37872             | -0.00783702 | -119.338                  |
| -5.3894              | -0.00467235 | -119.238                  |
| -5.36575             | -0.00411693 | -119.139                  |
| -5.38864             | -0.00381786 | -119.04                   |
| -5.38864             | -0.00598766 | -118.941                  |
| -5.37796             | -0.00332958 | -118.842                  |
| -5.39016             | -0.00335704 | -118.742                  |
| -5.39398             | -0.00315868 | -118.643                  |
| -5.37796             | -0.00289318 | -118.544                  |
| -5.38788             | -0.00265514 | -118.445                  |
| -5.37872             | -0.00247814 | -118.346                  |
| -5.36956             | -0.00225536 | -118.246                  |
| -5.37262             | -0.00213634 | -118.147                  |
| -5.3833              | -0.00193492 | -118.048                  |
| -5.38177             | -0.00177013 | -117.949                  |
| -5.37872             | -0.00155956 | -117.85                   |
| -5.36728             | -0.00469066 | -117.75                   |
| -5.36422             | -0.00150768 | -117.651                  |
| -5.36728             | -0.00126659 | -117.552                  |
| -5.35202             | -0.00113231 | -117.453                  |
| -5.34286             | -0.00092174 | -117.354                  |
| -5.34362             | -0.00082103 | -117.254                  |
| -5.3482              | -0.00075084 | -117.155                  |
| -5.33905             | -0.00061351 | -117.056                  |
| -5.33752             | -0.00046398 | -116.957                  |
| -5.34057             | -0.00032665 | -116.858                  |
| -5.32684             | -0.0002412  | -116.758                  |
| -5.31845             | -5.81E-05   | -116.659                  |
| -5.30853             | 0.00012196  | -116.56                   |
| -5.307               | 0.00021962  | -116.461                  |
| -5.29174             | 0.00038746  | -116.362                  |
| -5.29251             | 0.00058583  | -116.262                  |
| -5.29709             | 0.00065907  | -116.163                  |
| -5.27038             | 0.00073842  | -116.064                  |
| -5.28412             | 0.00086049  | -115.965                  |
| -5.27115             | 0.00100392  | -115.866                  |

|          |            |          |
|----------|------------|----------|
| -5.25131 | 0.00112294 | -115.766 |
| -5.24673 | 0.0012389  | -115.667 |
| -5.25207 | 0.00135792 | -115.568 |
| -5.233   | 0.0014861  | -115.469 |
| -5.22232 | 0.00155934 | -115.37  |
| -5.20935 | 0.00173024 | -115.27  |
| -5.20401 | 0.0017516  | -115.171 |
| -5.20019 | 0.00186146 | -115.072 |
| -5.20172 | 0.00207509 | -114.973 |
| -5.18417 | 0.00209034 | -114.874 |
| -5.17654 | 0.00222767 | -114.774 |
| -5.15518 | 0.0023528  | -114.675 |
| -5.15442 | 0.00253895 | -114.576 |
| -5.13992 | 0.00268239 | -114.477 |
| -5.12466 | 0.00270985 | -114.378 |
| -5.13611 | 0.0027892  | -114.278 |
| -5.11932 | 0.00292347 | -114.179 |
| -5.0972  | 0.00303639 | -114.08  |
| -5.07812 | 0.00308827 | -113.981 |
| -5.08117 | 0.00341481 | -113.882 |
| -5.06363 | 0.00335988 | -113.782 |
| -5.05523 | 0.00362233 | -113.683 |
| -5.0476  | 0.00371388 | -113.584 |
| -5.03387 | 0.00360402 | -113.485 |
| -5.02166 | 0.00398243 | -113.386 |
| -5.01556 | 0.00404347 | -113.286 |
| -5.01098 | 0.0040099  | -113.187 |
| -4.98275 | 0.00438832 | -113.088 |
| -4.98123 | 0.00429371 | -112.989 |
| -4.95987 | 0.00448597 | -112.89  |
| -4.96139 | 0.00454396 | -112.79  |
| -4.92859 | 0.00458363 | -112.691 |
| -4.93622 | 0.0048766  | -112.592 |
| -4.9057  | 0.0048705  | -112.493 |
| -4.89731 | 0.00492543 | -112.394 |
| -4.88434 | 0.00509022 | -112.294 |
| -4.87289 | 0.00520619 | -112.195 |
| -4.85611 | 0.00535267 | -112.096 |
| -4.83627 | 0.00517262 | -111.997 |
| -4.83017 | 0.00592335 | -111.898 |
| -4.80728 | 0.0054076  | -111.798 |
| -4.80041 | 0.00587452 | -111.699 |
| -4.77218 | 0.00573414 | -111.6   |
| -4.77447 | 0.00603627 | -111.501 |

|          |            |          |
|----------|------------|----------|
| -4.75845 | 0.00595997 | -111.402 |
| -4.72793 | 0.0062743  | -111.302 |
| -4.72259 | 0.0062621  | -111.203 |
| -4.71573 | 0.00634449 | -111.104 |
| -4.68368 | 0.00653065 | -111.005 |
| -4.67224 | 0.00661    | -110.906 |
| -4.66766 | 0.00680531 | -110.806 |
| -4.65469 | 0.00685109 | -110.707 |
| -4.62799 | 0.00699147 | -110.608 |
| -4.60739 | 0.00699452 | -110.509 |
| -4.58984 | 0.00723866 | -110.41  |
| -4.58679 | 0.00740956 | -110.31  |
| -4.56237 | 0.00732106 | -110.211 |
| -4.53796 | 0.00760182 | -110.112 |
| -4.52499 | 0.00762318 | -110.013 |
| -4.51812 | 0.00786732 | -109.914 |
| -4.49447 | 0.00796498 | -109.814 |
| -4.47998 | 0.00795277 | -109.715 |
| -4.44946 | 0.0081786  | -109.616 |
| -4.43191 | 0.00811146 | -109.517 |
| -4.41665 | 0.00831898 | -109.418 |
| -4.40063 | 0.00830372 | -109.318 |
| -4.37622 | 0.0085326  | -109.219 |
| -4.3808  | 0.00858143 | -109.12  |
| -4.3457  | 0.00867909 | -109.021 |
| -4.32892 | 0.008792   | -108.922 |
| -4.29001 | 0.00889576 | -108.822 |
| -4.29153 | 0.00897206 | -108.723 |
| -4.26101 | 0.00908497 | -108.624 |
| -4.23736 | 0.00912465 | -108.525 |
| -4.22287 | 0.00936879 | -108.426 |
| -4.18396 | 0.00942372 | -108.326 |
| -4.19235 | 0.009558   | -108.227 |
| -4.15878 | 0.00964955 | -108.128 |
| -4.142   | 0.00972584 | -108.029 |
| -4.10537 | 0.00985096 | -107.93  |
| -4.08859 | 0.00987843 | -107.83  |
| -4.0596  | 0.0100859  | -107.731 |
| -4.05273 | 0.01015    | -107.632 |
| -4.01306 | 0.0102691  | -107.533 |
| -3.99398 | 0.0103698  | -107.434 |
| -3.97567 | 0.010504   | -107.334 |
| -3.96194 | 0.0105681  | -107.235 |
| -3.92532 | 0.0107451  | -107.136 |

|          |           |          |
|----------|-----------|----------|
| -3.91922 | 0.0108336 | -107.037 |
| -3.87726 | 0.0108916 | -106.938 |
| -3.87268 | 0.0109435 | -106.838 |
| -3.82995 | 0.0111235 | -106.739 |
| -3.80859 | 0.0111083 | -106.64  |
| -3.79257 | 0.0112243 | -106.541 |
| -3.78189 | 0.0113463 | -106.442 |
| -3.76281 | 0.0114379 | -106.342 |
| -3.72543 | 0.0114562 | -106.243 |
| -3.71246 | 0.0115477 | -106.144 |
| -3.68194 | 0.0116484 | -106.045 |
| -3.64837 | 0.0117705 | -105.946 |
| -3.64151 | 0.0117949 | -105.846 |
| -3.59802 | 0.0119292 | -105.747 |
| -3.57742 | 0.0121398 | -105.648 |
| -3.54614 | 0.0121734 | -105.549 |
| -3.53241 | 0.0122252 | -105.45  |
| -3.50799 | 0.0123259 | -105.35  |
| -3.479   | 0.0123412 | -105.251 |
| -3.4584  | 0.0124816 | -105.152 |
| -3.41568 | 0.0125548 | -105.053 |
| -3.40118 | 0.0126799 | -104.954 |
| -3.376   | 0.0127807 | -104.854 |
| -3.33481 | 0.0129119 | -104.755 |
| -3.31573 | 0.0130248 | -104.656 |
| -3.28216 | 0.0130278 | -104.557 |
| -3.25012 | 0.0131591 | -104.458 |
| -3.22113 | 0.0133941 | -104.358 |
| -3.20663 | 0.0132171 | -104.259 |
| -3.18069 | 0.0135222 | -104.16  |
| -3.15017 | 0.0134612 | -104.061 |
| -3.12576 | 0.0134185 | -103.962 |
| -3.10058 | 0.0136931 | -103.862 |
| -3.09524 | 0.0135985 | -103.763 |
| -3.06549 | 0.013803  | -103.664 |
| -3.02429 | 0.013983  | -103.565 |
| -2.99148 | 0.0138213 | -103.466 |
| -2.95944 | 0.0140899 | -103.366 |
| -2.93426 | 0.0141753 | -103.267 |
| -2.92663 | 0.0141997 | -103.168 |
| -2.89535 | 0.0142485 | -103.069 |
| -2.86789 | 0.0142913 | -102.97  |
| -2.83203 | 0.0145629 | -102.87  |
| -2.78778 | 0.0141509 | -102.771 |

|          |           |          |
|----------|-----------|----------|
| -2.78473 | 0.0148925 | -102.672 |
| -2.73971 | 0.0144988 | -102.573 |
| -2.71225 | 0.0149993 | -102.474 |
| -2.70462 | 0.0146056 | -102.374 |
| -2.66037 | 0.0150237 | -102.275 |
| -2.62451 | 0.0148314 | -102.176 |
| -2.6123  | 0.0150115 | -102.077 |
| -2.57797 | 0.015042  | -101.978 |
| -2.55203 | 0.0151885 | -101.878 |
| -2.51999 | 0.0152984 | -101.779 |
| -2.49176 | 0.0153441 | -101.68  |
| -2.44674 | 0.0154052 | -101.581 |
| -2.42538 | 0.0153502 | -101.482 |
| -2.41012 | 0.0156127 | -101.382 |
| -2.35443 | 0.015808  | -101.283 |
| -2.33307 | 0.0157409 | -101.184 |
| -2.2911  | 0.015808  | -101.085 |
| -2.2705  | 0.0157622 | -100.986 |
| -2.23846 | 0.0160064 | -100.886 |
| -2.21252 | 0.0157958 | -100.787 |
| -2.18429 | 0.0160277 | -100.688 |
| -2.15377 | 0.0159942 | -100.589 |
| -2.12555 | 0.0160918 | -100.49  |
| -2.09045 | 0.0160216 | -100.39  |
| -2.06451 | 0.0162139 | -100.291 |
| -2.02484 | 0.0162444 | -100.192 |
| -1.99432 | 0.0163695 | -100.093 |
| -1.96151 | 0.0163482 | -99.9936 |
| -1.93405 | 0.0165435 | -99.8944 |
| -1.90353 | 0.0165526 | -99.7952 |
| -1.88369 | 0.0165862 | -99.696  |
| -1.83563 | 0.0166594 | -99.5968 |
| -1.81656 | 0.0166655 | -99.4976 |
| -1.77688 | 0.0167449 | -99.3984 |
| -1.74865 | 0.0167083 | -99.2992 |
| -1.7334  | 0.0168334 | -99.2    |
| -1.68838 | 0.0167968 | -99.1008 |
| -1.6571  | 0.0169066 | -99.0016 |
| -1.62582 | 0.0168486 | -98.9024 |
| -1.60141 | 0.0168975 | -98.8032 |
| -1.55487 | 0.0169616 | -98.704  |
| -1.52511 | 0.0170623 | -98.6048 |
| -1.50757 | 0.0170256 | -98.5056 |
| -1.46637 | 0.017105  | -98.4064 |

|            |           |          |
|------------|-----------|----------|
| -1.43966   | 0.017166  | -98.3072 |
| -1.40762   | 0.017221  | -98.208  |
| -1.38397   | 0.0172088 | -98.1088 |
| -1.34582   | 0.0172881 | -98.0096 |
| -1.31302   | 0.0172881 | -97.9104 |
| -1.268     | 0.0172759 | -97.8112 |
| -1.24664   | 0.0173034 | -97.712  |
| -1.22375   | 0.0171508 | -97.6128 |
| -1.20468   | 0.017282  | -97.5136 |
| -1.17035   | 0.0172179 | -97.4144 |
| -1.12381   | 0.0172942 | -97.3152 |
| -1.10092   | 0.0172576 | -97.216  |
| -1.06506   | 0.0173613 | -97.1168 |
| -1.0292    | 0.017401  | -97.0176 |
| -0.993344  | 0.0174193 | -96.9184 |
| -0.978848  | 0.0175048 | -96.8192 |
| -0.946042  | 0.017462  | -96.72   |
| -0.91171   | 0.0175383 | -96.6208 |
| -0.889584  | 0.0176055 | -96.5216 |
| -0.83923   | 0.0175322 | -96.4224 |
| -0.802609  | 0.0189696 | -96.3232 |
| -0.775143  | 0.0179625 | -96.224  |
| -0.7431    | 0.0177825 | -96.1248 |
| -0.70419   | 0.0178313 | -96.0256 |
| -0.685117  | 0.0179534 | -95.9264 |
| -0.637814  | 0.0180144 | -95.8272 |
| -0.602719  | 0.017987  | -95.728  |
| -0.577542  | 0.0179137 | -95.6288 |
| -0.559995  | 0.0179778 | -95.5296 |
| -0.518796  | 0.0180541 | -95.4304 |
| -0.503537  | 0.0180663 | -95.3312 |
| -0.453183  | 0.0181609 | -95.232  |
| -0.421902  | 0.0181517 | -95.1328 |
| -0.386044  | 0.018228  | -95.0336 |
| -0.365445  | 0.0183501 | -94.9344 |
| -0.338742  | 0.0182647 | -94.8352 |
| -0.313565  | 0.0183562 | -94.736  |
| -0.277707  | 0.0184203 | -94.6368 |
| -0.220486  | 0.0182921 | -94.5376 |
| -0.205991  | 0.0184661 | -94.4384 |
| -0.1564    | 0.01846   | -94.3392 |
| -0.128934  | 0.0183989 | -94.24   |
| -0.10452   | 0.0185851 | -94.1408 |
| -0.0701874 | 0.0186461 | -94.0416 |

|             |           |          |
|-------------|-----------|----------|
| -0.037381   | 0.0186278 | -93.9424 |
| -0.00991516 | 0.019049  | -93.8432 |
| 0.0251801   | 0.0181395 | -93.744  |
| 0.0610382   | 0.0191497 | -93.6448 |
| 0.0968964   | 0.0186919 | -93.5456 |
| 0.131992    | 0.018698  | -93.4464 |
| 0.156406    | 0.0200957 | -93.3472 |
| 0.209048    | 0.019171  | -93.248  |
| 0.218204    | 0.0189086 | -93.1488 |
| 0.246432    | 0.0189605 | -93.0496 |
| 0.28992     | 0.018936  | -92.9504 |
| 0.313571    | 0.0189696 | -92.8512 |
| 0.344089    | 0.0189422 | -92.752  |
| 0.38605     | 0.0189879 | -92.6528 |
| 0.424197    | 0.018994  | -92.5536 |
| 0.454715    | 0.0190551 | -92.4544 |
| 0.479892    | 0.0188323 | -92.3552 |
| 0.516513    | 0.0191375 | -92.256  |
| 0.550082    | 0.0191039 | -92.1568 |
| 0.5806      | 0.0189971 | -92.0576 |
| 0.620273    | 0.0189849 | -91.9584 |
| 0.662997    | 0.0201842 | -91.8592 |
| 0.690463    | 0.0198241 | -91.76   |
| 0.718692    | 0.0193145 | -91.6608 |
| 0.751498    | 0.0191619 | -91.5616 |
| 0.782016    | 0.0192046 | -91.4624 |
| 0.824741    | 0.019049  | -91.3632 |
| 0.842288    | 0.0190978 | -91.264  |
| 0.891116    | 0.0199157 | -91.1648 |
| 0.920108    | 0.0191893 | -91.0656 |
| 0.95444     | 0.0197875 | -90.9664 |
| 0.986484    | 0.0196074 | -90.8672 |
| 1.00632     | 0.0193938 | -90.768  |
| 1.05744     | 0.0192656 | -90.6688 |
| 1.08338     | 0.0191954 | -90.5696 |
| 1.10855     | 0.0192046 | -90.4704 |
| 1.15357     | 0.0191619 | -90.3712 |
| 1.17569     | 0.0193084 | -90.272  |
| 1.22986     | 0.0393828 | -90.1728 |
| 1.24817     | 0.0149993 | -90.0736 |
| 1.25962     | 0.0193938 | -89.9744 |
| 1.31531     | 0.0196654 | -89.8752 |
| 1.34049     | 0.0197142 | -89.776  |
| 1.38092     | 0.0199187 | -89.6768 |

|         |           |          |
|---------|-----------|----------|
| 1.39771 | 0.0200072 | -89.5776 |
| 1.43204 | 0.0230773 | -89.4784 |
| 1.46866 | 0.0225585 | -89.3792 |
| 1.50223 | 0.0201812 | -89.28   |
| 1.51444 | 0.0198119 | -89.1808 |
| 1.55487 | 0.0197204 | -89.0816 |
| 1.58081 | 0.0197081 | -88.9824 |
| 1.60446 | 0.0196471 | -88.8832 |
| 1.64414 | 0.019464  | -88.784  |
| 1.67618 | 0.0193969 | -88.6848 |
| 1.71204 | 0.019348  | -88.5856 |
| 1.74408 | 0.0192687 | -88.4864 |
| 1.79673 | 0.0233794 | -88.3872 |
| 1.80741 | 0.0286406 | -88.288  |
| 1.84937 | 0.0217162 | -88.1888 |
| 1.87912 | 0.0196776 | -88.0896 |
| 1.89743 | 0.0197905 | -87.9904 |
| 1.91422 | 0.0197142 | -87.8912 |
| 1.95008 | 0.0197997 | -87.792  |
| 1.99967 | 0.0198485 | -87.6928 |
| 2.01798 | 0.020349  | -87.5936 |
| 2.0401  | 0.0198943 | -87.4944 |
| 2.09275 | 0.0194915 | -87.3952 |
| 2.12632 | 0.0193511 | -87.296  |
| 2.15302 | 0.020996  | -87.1968 |
| 2.16828 | 0.0194671 | -87.0976 |
| 2.21711 | 0.019229  | -86.9984 |
| 2.2461  | 0.0193694 | -86.8992 |
| 2.2789  | 0.0193419 | -86.8    |
| 2.30484 | 0.0200133 | -86.7008 |
| 2.34223 | 0.0190825 | -86.6016 |
| 2.37656 | 0.0191192 | -86.5024 |
| 2.40555 | 0.0189055 | -86.4032 |
| 2.4292  | 0.0188598 | -86.304  |
| 2.45133 | 0.0360228 | -86.2048 |
| 2.4849  | 0.0188842 | -86.1056 |
| 2.51007 | 0.019818  | -86.0064 |
| 2.53907 | 0.0196532 | -85.9072 |
| 2.56195 | 0.0193816 | -85.808  |
| 2.57645 | 0.0199492 | -85.7088 |
| 2.61078 | 0.0197417 | -85.6096 |
| 2.63672 | 0.0197936 | -85.5104 |
| 2.66648 | 0.0200408 | -85.4112 |
| 2.69089 | 0.0194213 | -85.312  |



|         |           |          |
|---------|-----------|----------|
| 2.72599 | 0.0194213 | -85.2128 |
| 2.75421 | 0.0188445 | -85.1136 |
| 2.78931 | 0.0188475 | -85.0144 |
| 2.81449 | 0.0188048 | -84.9152 |
| 2.84653 | 0.0182708 | -84.816  |
| 2.88086 | 0.0191893 | -84.7168 |
| 2.90528 | 0.0181182 | -84.6176 |
| 2.94419 | 0.0186644 | -84.5184 |
| 2.97699 | 0.0186126 | -84.4192 |
| 2.99759 | 0.0182341 | -84.32   |
| 3.02353 | 0.0181853 | -84.2208 |
| 3.04947 | 0.0181304 | -84.1216 |
| 3.0838  | 0.0180846 | -84.0224 |
| 3.10364 | 0.0180266 | -83.9232 |
| 3.14102 | 0.0208098 | -83.824  |
| 3.15247 | 0.0364318 | -83.7248 |
| 3.17841 | 0.0193969 | -83.6256 |
| 3.21122 | 0.0197661 | -83.5264 |
| 3.23181 | 0.0189605 | -83.4272 |
| 3.25775 | 0.0190459 | -83.328  |
| 3.27454 | 0.0196318 | -83.2288 |
| 3.28446 | 0.0187224 | -83.1296 |
| 3.32184 | 0.0184844 | -83.0304 |
| 3.3577  | 0.0187255 | -82.9312 |
| 3.37448 | 0.0179961 | -82.832  |
| 3.40271 | 0.0181212 | -82.7328 |
| 3.4317  | 0.0182128 | -82.6336 |
| 3.45612 | 0.0175994 | -82.5344 |
| 3.48587 | 0.0176818 | -82.4352 |
| 3.51639 | 0.0176146 | -82.336  |
| 3.54538 | 0.0172484 | -82.2368 |
| 3.56598 | 0.0172545 | -82.1376 |
| 3.58811 | 0.0169585 | -82.0384 |
| 3.60871 | 0.0169982 | -81.9392 |
| 3.6438  | 0.0170195 | -81.84   |
| 3.67813 | 0.0170653 | -81.7408 |
| 3.69263 | 0.0167754 | -81.6416 |
| 3.72238 | 0.0168822 | -81.5424 |
| 3.73688 | 0.0167907 | -81.4432 |
| 3.75519 | 0.0167113 | -81.344  |
| 3.77808 | 0.0164885 | -81.2448 |
| 3.80783 | 0.0167785 | -81.1456 |
| 3.83454 | 0.0175628 | -81.0464 |
| 3.85895 | 0.0165831 | -80.9472 |

|         |            |          |
|---------|------------|----------|
| 3.88947 | 0.0167754  | -80.848  |
| 3.90625 | 0.0162169  | -80.7488 |
| 3.91846 | 0.0164397  | -80.6496 |
| 3.94516 | 0.0378051  | -80.5504 |
| 3.965   | 0.00887745 | -80.4512 |
| 3.99704 | 0.0159087  | -80.352  |
| 4.01688 | 0.0162474  | -80.2528 |
| 4.02298 | 0.0162932  | -80.1536 |
| 4.05579 | 0.0161681  | -80.0544 |
| 4.07334 | 0.0162841  | -79.9552 |
| 4.10157 | 0.0173369  | -79.856  |
| 4.12369 | 0.0163268  | -79.7568 |
| 4.13132 | 0.0158446  | -79.6576 |
| 4.1565  | 0.0160949  | -79.5584 |
| 4.1771  | 0.0155761  | -79.4592 |
| 4.19159 | 0.0160827  | -79.36   |
| 4.21448 | 0.01528    | -79.2608 |
| 4.24652 | 0.0150451  | -79.1616 |
| 4.26636 | 0.0150817  | -79.0624 |
| 4.28315 | 0.0150512  | -78.9632 |
| 4.32282 | 0.0189238  | -78.864  |
| 4.32968 | 0.0151336  | -78.7648 |
| 4.33655 | 0.014923   | -78.6656 |
| 4.37775 | 0.0147277  | -78.5664 |
| 4.38614 | 0.0146209  | -78.4672 |
| 4.41284 | 0.0147582  | -78.368  |
| 4.43726 | 0.0144072  | -78.2688 |
| 4.44565 | 0.0143523  | -78.1696 |
| 4.4838  | 0.0143889  | -78.0704 |
| 4.5044  | 0.0141997  | -77.9712 |
| 4.5166  | 0.0141997  | -77.872  |
| 4.52576 | 0.0147643  | -77.7728 |
| 4.55475 | 0.0147765  | -77.6736 |
| 4.56772 | 0.013687   | -77.5744 |
| 4.5929  | 0.0247313  | -77.4752 |
| 4.5929  | 0.0256072  | -77.376  |
| 4.62647 | 0.0140166  | -77.2768 |
| 4.64249 | 0.014099   | -77.1776 |
| 4.64478 | 0.0137725  | -77.0784 |
| 4.65012 | 0.0140227  | -76.9792 |
| 4.67377 | 0.0138762  | -76.88   |
| 4.6875  | 0.0140441  | -76.7808 |
| 4.7081  | 0.0137236  | -76.6816 |
| 4.71192 | 0.0135802  | -76.5824 |

|         |            |          |
|---------|------------|----------|
| 4.73786 | 0.0132293  | -76.4832 |
| 4.75769 | 0.0130278  | -76.384  |
| 4.77066 | 0.012683   | -76.2848 |
| 4.78592 | 0.0130034  | -76.1856 |
| 4.805   | 0.0126342  | -76.0864 |
| 4.8172  | 0.0132293  | -75.9872 |
| 4.84925 | 0.0124175  | -75.888  |
| 4.84925 | 0.0118956  | -75.7888 |
| 4.8584  | 0.0123107  | -75.6896 |
| 4.89426 | 0.0118804  | -75.5904 |
| 4.88739 | 0.0117766  | -75.4912 |
| 4.9141  | 0.0117797  | -75.392  |
| 4.93164 | 0.0115294  | -75.2928 |
| 4.95911 | 0.0113738  | -75.1936 |
| 4.96216 | 0.011505   | -75.0944 |
| 4.97284 | 0.0112639  | -74.9952 |
| 4.99192 | 0.0111358  | -74.896  |
| 5.01023 | 0.0107146  | -74.7968 |
| 5.00641 | 0.0108519  | -74.6976 |
| 5.03998 | 0.0115661  | -74.5984 |
| 5.05448 | 0.0106688  | -74.4992 |
| 5.0705  | 0.0145568  | -74.4    |
| 5.06134 | 0.0101439  | -74.3008 |
| 5.08499 | 0.0108794  | -74.2016 |
| 5.0911  | 0.0106994  | -74.1024 |
| 5.10559 | 0.0103545  | -74.0032 |
| 5.12619 | 0.0100097  | -73.904  |
| 5.12314 | 0.00989979 | -73.8048 |
| 5.16053 | 0.00981434 | -73.7056 |
| 5.15213 | 0.00956105 | -73.6064 |
| 5.17121 | 0.00963124 | -73.5072 |
| 5.1735  | 0.00978077 | -73.408  |
| 5.19715 | 0.011325   | -73.3088 |
| 5.2002  | 0.00901478 | -73.2096 |
| 5.21317 | 0.00918568 | -73.1104 |
| 5.20935 | 0.00910328 | -73.0112 |
| 5.21393 | 0.00881642 | -72.912  |
| 5.23835 | 0.00867909 | -72.8128 |
| 5.25132 | 0.00845326 | -72.7136 |
| 5.24063 | 0.00857228 | -72.6144 |
| 5.26276 | 0.00866688 | -72.5152 |
| 5.26657 | 0.00842885 | -72.416  |
| 5.27802 | 0.00819691 | -72.3168 |
| 5.27802 | 0.00795277 | -72.2176 |

|         |            |          |
|---------|------------|----------|
| 5.30625 | 0.00766896 | -72.1184 |
| 5.29251 | 0.00775135 | -72.0192 |
| 5.31464 | 0.00764149 | -71.92   |
| 5.32227 | 0.00746449 | -71.8208 |
| 5.31845 | 0.0172057  | -71.7216 |
| 5.33676 | 0.00809315 | -71.6224 |
| 5.336   | 0.0073882  | -71.5232 |
| 5.34134 | 0.00725392 | -71.424  |
| 5.3627  | 0.00698231 | -71.3248 |
| 5.35736 | 0.00699757 | -71.2256 |
| 5.36042 | 0.00681141 | -71.1264 |
| 5.36118 | 0.0068755  | -71.0272 |
| 5.35965 | 0.00744618 | -70.928  |
| 5.35736 | 0.00681447 | -70.8288 |
| 5.37491 | 0.00636586 | -70.7296 |
| 5.36118 | 0.00621632 | -70.6304 |
| 5.37339 | 0.00602101 | -70.5312 |
| 5.38788 | 0.00615834 | -70.432  |
| 5.3917  | 0.0140593  | -70.3328 |
| 5.38559 | 0.00588673 | -70.2336 |
| 5.39856 | 0.00583485 | -70.1344 |
| 5.39475 | 0.00564259 | -70.0352 |
| 5.40314 | 0.00551136 | -69.936  |
| 5.40848 | 0.00536793 | -69.8368 |
| 5.4123  | 0.00523365 | -69.7376 |
| 5.41687 | 0.00511464 | -69.6384 |
| 5.41077 | 0.00513295 | -69.5392 |
| 5.41001 | 0.00525502 | -69.44   |
| 5.41916 | 0.00469349 | -69.3408 |
| 5.41687 | 0.0046996  | -69.2416 |
| 5.40924 | 0.00453785 | -69.1424 |
| 5.41306 | 0.00428151 | -69.0432 |
| 5.42679 | 0.00421437 | -68.944  |
| 5.42527 | 0.00388783 | -68.8448 |
| 5.42145 | 0.00377186 | -68.7456 |
| 5.43213 | 0.00346058 | -68.6464 |
| 5.4184  | 0.00330189 | -68.5472 |
| 5.43366 | 0.00319813 | -68.448  |
| 5.42679 | 0.00300892 | -68.3488 |
| 5.43976 | 0.00262135 | -68.2496 |
| 5.43061 | 0.00243519 | -68.1504 |
| 5.41764 | 0.00227345 | -68.0512 |
| 5.41992 | 0.00212391 | -67.952  |
| 5.42298 | 0.00185841 | -67.8528 |

|         |             |          |
|---------|-------------|----------|
| 5.41153 | 0.00179737  | -67.7536 |
| 5.41916 | 0.00161427  | -67.6544 |
| 5.4123  | 0.0014983   | -67.5552 |
| 5.41306 | 0.00151051  | -67.456  |
| 5.42374 | 0.00126942  | -67.3568 |
| 5.41382 | 0.0011382   | -67.2576 |
| 5.39398 | 0.00096119  | -67.1584 |
| 5.40467 | 0.00185536  | -67.0592 |
| 5.39627 | 0.00078114  | -66.96   |
| 5.39627 | 0.00130909  | -66.8608 |
| 5.38483 | 0.00050648  | -66.7616 |
| 5.38559 | 0.00049122  | -66.6624 |
| 5.3833  | 0.00039052  | -66.5632 |
| 5.37491 | 0.00022572  | -66.464  |
| 5.36423 | 0.0002715   | -66.3648 |
| 5.37339 | 0.00010365  | -66.2656 |
| 5.34592 | -6.11E-05   | -66.1664 |
| 5.33982 | -0.0001588  | -66.0672 |
| 5.33982 | -0.00033886 | -65.968  |
| 5.32608 | -0.0003358  | -65.8688 |
| 5.3154  | -0.00062572 | -65.7696 |
| 5.31845 | -0.00082408 | -65.6704 |
| 5.32074 | -0.00146801 | -65.5712 |
| 5.3154  | -0.00153514 | -65.472  |
| 5.3032  | -0.00167552 | -65.3728 |
| 5.29175 | -0.00194103 | -65.2736 |
| 5.30625 | -0.00199596 | -65.1744 |
| 5.26963 | -0.00211803 | -65.0752 |
| 5.26581 | -0.00203258 | -64.976  |
| 5.25437 | -0.00219432 | -64.8768 |
| 5.23606 | -0.00225841 | -64.7776 |
| 5.23529 | -0.00239574 | -64.6784 |
| 5.22461 | -0.0023347  | -64.5792 |
| 5.19944 | -0.00251781 | -64.48   |
| 5.20401 | -0.00280468 | -64.3808 |
| 5.18799 | -0.00307933 | -64.2816 |
| 5.19028 | -0.00350963 | -64.1824 |
| 5.16663 | -0.00382701 | -64.0832 |
| 5.15366 | -0.00387279 | -63.984  |
| 5.15747 | -0.00396434 | -63.8848 |
| 5.1384  | -0.00398265 | -63.7856 |
| 5.12467 | -0.00401317 | -63.6864 |
| 5.11246 | -0.00405284 | -63.5872 |
| 5.09339 | -0.00418712 | -63.488  |

|         |             |          |
|---------|-------------|----------|
| 5.07965 | -0.0043214  | -63.3888 |
| 5.06668 | -0.0044038  | -63.2896 |
| 5.06134 | -0.00421154 | -63.1904 |
| 5.03617 | -0.00442821 | -63.0912 |
| 5.03311 | -0.00455944 | -62.992  |
| 5.02396 | -0.0045808  | -62.8928 |
| 5.0026  | -0.00467845 | -62.7936 |
| 4.97971 | -0.00484935 | -62.6944 |
| 4.97742 | -0.00490123 | -62.5952 |
| 4.97284 | -0.00497142 | -62.496  |
| 4.94919 | -0.0051057  | -62.3968 |
| 4.93088 | -0.00520946 | -62.2976 |
| 4.93012 | -0.00530101 | -62.1984 |
| 4.9141  | -0.00542614 | -62.0992 |
| 4.88816 | -0.00546886 | -62      |
| 4.8935  | -0.00555431 | -61.9008 |
| 4.86374 | -0.00565197 | -61.8016 |
| 4.85306 | -0.00578014 | -61.7024 |
| 4.83094 | -0.00595409 | -61.6032 |
| 4.81568 | -0.00601512 | -61.504  |
| 4.80347 | -0.00613109 | -61.4048 |
| 4.7699  | -0.00616466 | -61.3056 |
| 4.76532 | -0.00621044 | -61.2064 |
| 4.75617 | -0.00636608 | -61.1072 |
| 4.72794 | -0.00645763 | -61.008  |
| 4.73709 | -0.00654003 | -60.9088 |
| 4.71268 | -0.00667125 | -60.8096 |
| 4.68293 | -0.00682384 | -60.7104 |
| 4.68064 | -0.00689708 | -60.6112 |
| 4.64783 | -0.00696422 | -60.512  |
| 4.63715 | -0.00711376 | -60.4128 |
| 4.62723 | -0.00722362 | -60.3136 |
| 4.59671 | -0.00727245 | -60.2144 |
| 4.59824 | -0.0073701  | -60.1152 |
| 4.56772 | -0.00746471 | -60.016  |
| 4.54026 | -0.00759594 | -59.9168 |
| 4.53644 | -0.00769664 | -59.8176 |
| 4.50821 | -0.00776378 | -59.7184 |
| 4.50592 | -0.00795909 | -59.6192 |
| 4.48151 | -0.00804454 | -59.52   |
| 4.45252 | -0.00816967 | -59.4208 |
| 4.42887 | -0.00819103 | -59.3216 |
| 4.42429 | -0.00828868 | -59.2224 |
| 4.41437 | -0.00843822 | -59.1232 |

|         |             |          |
|---------|-------------|----------|
| 4.39759 | -0.00847179 | -59.024  |
| 4.36783 | -0.0086549  | -58.9248 |
| 4.33731 | -0.00873424 | -58.8256 |
| 4.319   | -0.00881969 | -58.7264 |
| 4.30451 | -0.00900585 | -58.6272 |
| 4.28315 | -0.00901805 | -58.528  |
| 4.26636 | -0.00911571 | -58.4288 |
| 4.24347 | -0.00889598 | -58.3296 |
| 4.22287 | -0.00969249 | -58.2304 |
| 4.20456 | -0.00904552 | -58.1312 |
| 4.17786 | -0.00964061 | -58.032  |
| 4.1771  | -0.00948802 | -57.9328 |
| 4.15345 | -0.00981761 | -57.8336 |
| 4.12064 | -0.00970775 | -57.7344 |
| 4.11148 | -0.00989086 | -57.6352 |
| 4.09317 | -0.00998546 | -57.536  |
| 4.06494 | -0.00997325 | -57.4368 |
| 4.03061 | -0.0101503  | -57.3376 |
| 4.02222 | -0.0101838  | -57.2384 |
| 3.99475 | -0.0103273  | -57.1392 |
| 3.9856  | -0.0102662  | -57.04   |
| 3.96118 | -0.0106172  | -56.9408 |
| 3.93601 | -0.0106263  | -56.8416 |
| 3.9177  | -0.0107545  | -56.7424 |
| 3.88336 | -0.010843   | -56.6432 |
| 3.87268 | -0.0110414  | -56.544  |
| 3.84369 | -0.0110017  | -56.4448 |
| 3.82233 | -0.0111909  | -56.3456 |
| 3.79181 | -0.011194   | -56.2464 |
| 3.77503 | -0.011313   | -56.1472 |
| 3.74985 | -0.0113984  | -56.048  |
| 3.72925 | -0.011548   | -55.9488 |
| 3.72391 | -0.0115663  | -55.8496 |
| 3.70255 | -0.011728   | -55.7504 |
| 3.66364 | -0.0117616  | -55.6512 |
| 3.64838 | -0.0118898  | -55.552  |
| 3.60871 | -0.0119599  | -55.4528 |
| 3.57743 | -0.0120485  | -55.3536 |
| 3.56369 | -0.0121797  | -55.2544 |
| 3.54004 | -0.012259   | -55.1552 |
| 3.51715 | -0.0124391  | -55.056  |
| 3.49045 | -0.0124849  | -54.9568 |
| 3.46527 | -0.01261    | -54.8576 |
| 3.44162 | -0.0126039  | -54.7584 |

|         |            |          |
|---------|------------|----------|
| 3.4195  | -0.0127381 | -54.6592 |
| 3.39814 | -0.0128114 | -54.56   |
| 3.35617 | -0.0130037 | -54.4608 |
| 3.33329 | -0.0129853 | -54.3616 |
| 3.32108 | -0.0130769 | -54.2624 |
| 3.28369 | -0.0131501 | -54.1632 |
| 3.26767 | -0.0132569 | -54.064  |
| 3.23334 | -0.013379  | -53.9648 |
| 3.20282 | -0.0134004 | -53.8656 |
| 3.18451 | -0.0135255 | -53.7664 |
| 3.15171 | -0.0135926 | -53.6672 |
| 3.12119 | -0.0137849 | -53.568  |
| 3.09525 | -0.0138856 | -53.4688 |
| 3.08075 | -0.013968  | -53.3696 |
| 3.05634 | -0.0141328 | -53.2704 |
| 3.02506 | -0.0140168 | -53.1712 |
| 2.98081 | -0.0141603 | -53.072  |
| 2.96555 | -0.0143708 | -52.9728 |
| 2.9213  | -0.0143342 | -52.8736 |
| 2.89231 | -0.014322  | -52.7744 |
| 2.87018 | -0.0144075 | -52.6752 |
| 2.84882 | -0.0144838 | -52.576  |
| 2.80915 | -0.0146791 | -52.4768 |
| 2.77634 | -0.0146394 | -52.3776 |
| 2.74735 | -0.0147279 | -52.2784 |
| 2.73133 | -0.0147645 | -52.1792 |
| 2.69852 | -0.014853  | -52.08   |
| 2.6619  | -0.0148957 | -51.9808 |
| 2.64893 | -0.0149659 | -51.8816 |
| 2.61383 | -0.0150941 | -51.7824 |
| 2.57492 | -0.0151612 | -51.6832 |
| 2.55432 | -0.0151551 | -51.584  |
| 2.53144 | -0.0152955 | -51.4848 |
| 2.50168 | -0.0153627 | -51.3856 |
| 2.4704  | -0.0154206 | -51.2864 |
| 2.42157 | -0.0154725 | -51.1872 |
| 2.42157 | -0.0155915 | -51.088  |
| 2.37885 | -0.01568   | -50.9888 |
| 2.35367 | -0.0156709 | -50.8896 |
| 2.32163 | -0.0157533 | -50.7904 |
| 2.2934  | -0.0158143 | -50.6912 |
| 2.23923 | -0.0158052 | -50.592  |
| 2.21787 | -0.0159181 | -50.4928 |
| 2.1843  | -0.0159944 | -50.3936 |



|          |            |          |
|----------|------------|----------|
| 2.16523  | -0.015973  | -50.2944 |
| 2.12021  | -0.0160066 | -50.1952 |
| 2.10648  | -0.0161622 | -50.096  |
| 2.05765  | -0.0161683 | -49.9968 |
| 2.03629  | -0.0161836 | -49.8976 |
| 2.01645  | -0.0163209 | -49.7984 |
| 1.98746  | -0.0163911 | -49.6992 |
| 1.94702  | -0.0164003 | -49.6    |
| 1.92108  | -0.0164491 | -49.5008 |
| 1.89286  | -0.0165315 | -49.4016 |
| 1.86081  | -0.0165712 | -49.3024 |
| 1.84098  | -0.0168672 | -49.2032 |
| 1.78986  | -0.0162538 | -49.104  |
| 1.75705  | -0.0168306 | -49.0048 |
| 1.7334   | -0.0165712 | -48.9056 |
| 1.69144  | -0.0168031 | -48.8064 |
| 1.66092  | -0.0166413 | -48.7072 |
| 1.62049  | -0.0168458 | -48.608  |
| 1.60599  | -0.0167756 | -48.5088 |
| 1.57852  | -0.0168885 | -48.4096 |
| 1.5564   | -0.0168367 | -48.3104 |
| 1.51596  | -0.0169984 | -48.2112 |
| 1.49384  | -0.0169557 | -48.112  |
| 1.45569  | -0.0170289 | -48.0128 |
| 1.42365  | -0.016974  | -47.9136 |
| 1.38016  | -0.0171083 | -47.8144 |
| 1.34888  | -0.0169618 | -47.7152 |
| 1.32065  | -0.0172212 | -47.616  |
| 1.29242  | -0.0172792 | -47.5168 |
| 1.26267  | -0.0172212 | -47.4176 |
| 1.23291  | -0.0172364 | -47.3184 |
| 1.18637  | -0.0173982 | -47.2192 |
| 1.15815  | -0.0172578 | -47.12   |
| 1.12992  | -0.0173371 | -47.0208 |
| 1.09864  | -0.017389  | -46.9216 |
| 1.06659  | -0.0174043 | -46.8224 |
| 1.04447  | -0.0174653 | -46.7232 |
| 1.01166  | -0.0175538 | -46.624  |
| 0.977328 | -0.0175721 | -46.5248 |
| 0.955966 | -0.0176301 | -46.4256 |
| 0.906375 | -0.0177461 | -46.3264 |
| 0.870517 | -0.0176911 | -46.2272 |
| 0.833896 | -0.0177369 | -46.128  |
| 0.805667 | -0.0177674 | -46.0288 |

|             |            |          |
|-------------|------------|----------|
| 0.77515     | -0.0177797 | -45.9296 |
| 0.74921     | -0.0178773 | -45.8304 |
| 0.706485    | -0.0179505 | -45.7312 |
| 0.660709    | -0.0179811 | -45.632  |
| 0.660709    | -0.0180391 | -45.5328 |
| 0.604251    | -0.0180787 | -45.4336 |
| 0.578311    | -0.0181245 | -45.3344 |
| 0.550845    | -0.0182038 | -45.2352 |
| 0.494388    | -0.0180635 | -45.136  |
| 0.481418    | -0.0181764 | -45.0368 |
| 0.442508    | -0.0181916 | -44.9376 |
| 0.405887    | -0.0182405 | -44.8384 |
| 0.376895    | -0.0182008 | -44.7392 |
| 0.349429    | -0.0182893 | -44.64   |
| 0.321964    | -0.0183412 | -44.5408 |
| 0.280002    | -0.0183198 | -44.4416 |
| 0.238803    | -0.0183137 | -44.3424 |
| 0.222018    | -0.0184144 | -44.2432 |
| 0.194553    | -0.0184449 | -44.144  |
| 0.157169    | -0.0184022 | -44.0448 |
| 0.109103    | -0.0185304 | -43.9456 |
| 0.0839264   | -0.0202058 | -43.8464 |
| 0.0518829   | -0.0188813 | -43.7472 |
| 0.00534363  | -0.0185273 | -43.648  |
| -0.00991516 | -0.0185853 | -43.5488 |
| -0.0633209  | -0.0186769 | -43.4496 |
| -0.0961273  | -0.018564  | -43.3504 |
| -0.125119   | -0.0187806 | -43.2512 |
| -0.148007   | -0.0189576 | -43.152  |
| -0.199887   | -0.0186158 | -43.0528 |
| -0.211331   | -0.0187379 | -42.9536 |
| -0.256345   | -0.018744  | -42.8544 |
| -0.289914   | -0.0188142 | -42.7552 |
| -0.318906   | -0.0187989 | -42.656  |
| -0.34866    | -0.0187165 | -42.5568 |
| -0.384518   | -0.0187318 | -42.4576 |
| -0.414273   | -0.0188234 | -42.3584 |
| -0.447842   | -0.0187165 | -42.2592 |
| -0.473782   | -0.0188325 | -42.16   |
| -0.498196   | -0.0188478 | -42.0608 |
| -0.534055   | -0.0188356 | -41.9616 |
| -0.58212    | -0.0188691 | -41.8624 |
| -0.611111   | -0.0188234 | -41.7632 |
| -0.638577   | -0.0188325 | -41.664  |

|           |            |          |
|-----------|------------|----------|
| -0.675198 | -0.0187593 | -41.5648 |
| -0.710294 | -0.0188478 | -41.4656 |
| -0.740811 | -0.0187379 | -41.3664 |
| -0.779721 | -0.0187715 | -41.2672 |
| -0.811765 | -0.018802  | -41.168  |
| -0.83389  | -0.0243959 | -41.0688 |
| -0.868985 | -0.0198884 | -40.9696 |
| -0.897214 | -0.0192994 | -40.8704 |
| -0.931546 | -0.0192628 | -40.7712 |
| -0.953671 | -0.0191651 | -40.672  |
| -0.991055 | -0.0192537 | -40.5728 |
| -1.017    | -0.020688  | -40.4736 |
| -1.05362  | -0.0192567 | -40.3744 |
| -1.07879  | -0.0190278 | -40.2752 |
| -1.12075  | -0.0191224 | -40.176  |
| -1.1383   | -0.018979  | -40.0768 |
| -1.18713  | -0.01904   | -39.9776 |
| -1.20468  | -0.0190522 | -39.8784 |
| -1.25274  | -0.0208161 | -39.7792 |
| -1.27868  | -0.0187257 | -39.68   |
| -1.31225  | -0.0188752 | -39.5808 |
| -1.33972  | -0.0187867 | -39.4816 |
| -1.371    | -0.0188935 | -39.3824 |
| -1.40533  | -0.0188539 | -39.2832 |
| -1.43127  | -0.0188386 | -39.184  |
| -1.45416  | -0.0187776 | -39.0848 |
| -1.49765  | -0.01886   | -38.9856 |
| -1.53961  | -0.0187562 | -38.8864 |
| -1.55182  | -0.018686  | -38.7872 |
| -1.6098   | -0.0188234 | -38.688  |
| -1.63269  | -0.0187837 | -38.5888 |
| -1.66855  | -0.0187349 | -38.4896 |
| -1.70364  | -0.0187898 | -38.3904 |
| -1.72882  | -0.0186219 | -38.2912 |
| -1.7601   | -0.0186463 | -38.192  |
| -1.77765  | -0.0185914 | -38.0928 |
| -1.81884  | -0.0185304 | -37.9936 |
| -1.83868  | -0.0185762 | -37.8944 |
| -1.86844  | -0.0186769 | -37.7952 |
| -1.89972  | -0.0184907 | -37.696  |
| -1.91726  | -0.0186616 | -37.5968 |
| -1.96533  | -0.0184877 | -37.4976 |
| -2.01721  | -0.0185243 | -37.3984 |
| -2.03018  | -0.0185334 | -37.2992 |

|          |            |          |
|----------|------------|----------|
| -2.07214 | -0.0184541 | -37.2    |
| -2.09121 | -0.0184999 | -37.1008 |
| -2.12402 | -0.0183442 | -37.0016 |
| -2.16369 | -0.0182862 | -36.9024 |
| -2.1904  | -0.0183747 | -36.8032 |
| -2.21328 | -0.0182588 | -36.704  |
| -2.25143 | -0.0182344 | -36.6048 |
| -2.28271 | -0.0181855 | -36.5056 |
| -2.30407 | -0.0182038 | -36.4064 |
| -2.31857 | -0.0182038 | -36.3072 |
| -2.38189 | -0.0181214 | -36.208  |
| -2.39334 | -0.0180818 | -36.1088 |
| -2.42004 | -0.0179597 | -36.0096 |
| -2.45666 | -0.0179811 | -35.9104 |
| -2.48489 | -0.0179902 | -35.8112 |
| -2.51083 | -0.0178865 | -35.712  |
| -2.55737 | -0.0178376 | -35.6128 |
| -2.56576 | -0.0177278 | -35.5136 |
| -2.60086 | -0.0177827 | -35.4144 |
| -2.6268  | -0.0177217 | -35.3152 |
| -2.66418 | -0.0176454 | -35.216  |
| -2.69775 | -0.0205232 | -35.1168 |
| -2.72369 | -0.0204408 | -35.0176 |
| -2.75192 | -0.018152  | -34.9184 |
| -2.7771  | -0.0181001 | -34.8192 |
| -2.79922 | -0.0179292 | -34.72   |
| -2.81295 | -0.0181672 | -34.6208 |
| -2.85949 | -0.0181337 | -34.5216 |
| -2.88543 | -0.0223451 | -34.4224 |
| -2.90603 | -0.0192811 | -34.3232 |
| -2.94265 | -0.0216828 | -34.224  |
| -2.96707 | -0.0202241 | -34.1248 |
| -2.98767 | -0.0181581 | -34.0256 |
| -3.00445 | -0.0179841 | -33.9264 |
| -3.02887 | -0.0177858 | -33.8272 |
| -3.05481 | -0.0179048 | -33.728  |
| -3.09524 | -0.0177613 | -33.6288 |
| -3.11584 | -0.0175874 | -33.5296 |
| -3.14407 | -0.017917  | -33.4304 |
| -3.17306 | -0.0175874 | -33.3312 |
| -3.20053 | -0.0174104 | -33.232  |
| -3.23257 | -0.0171296 | -33.1328 |
| -3.26385 | -0.017151  | -33.0336 |
| -3.27682 | -0.0169862 | -32.9344 |

|          |            |          |
|----------|------------|----------|
| -3.30658 | -0.0168611 | -32.8352 |
| -3.34015 | -0.0168214 | -32.736  |
| -3.36303 | -0.0184327 | -32.6368 |
| -3.37677 | -0.0169435 | -32.5376 |
| -3.40423 | -0.0167268 | -32.4384 |
| -3.44925 | -0.0166444 | -32.3392 |
| -3.47366 | -0.0165834 | -32.24   |
| -3.48892 | -0.0164949 | -32.1408 |
| -3.54232 | -0.0164399 | -32.0416 |
| -3.53546 | -0.0163484 | -31.9424 |
| -3.56979 | -0.016269  | -31.8432 |
| -3.58276 | -0.0161622 | -31.744  |
| -3.61786 | -0.0226136 | -31.6448 |
| -3.64761 | -0.0169282 | -31.5456 |
| -3.66592 | -0.0163758 | -31.4464 |
| -3.68576 | -0.0162477 | -31.3472 |
| -3.7178  | -0.0160371 | -31.248  |
| -3.73687 | -0.0159852 | -31.1488 |
| -3.759   | -0.0204591 | -31.0496 |
| -3.77731 | -0.0197541 | -30.9504 |
| -3.80249 | -0.0169068 | -30.8512 |
| -3.82614 | -0.0159181 | -30.752  |
| -3.84369 | -0.015915  | -30.6528 |
| -3.87191 | -0.0157197 | -30.5536 |
| -3.89099 | -0.0157685 | -30.4544 |
| -3.91006 | -0.0156526 | -30.3552 |
| -3.94592 | -0.0154725 | -30.256  |
| -3.96347 | -0.0153352 | -30.1568 |
| -3.9833  | -0.0160127 | -30.0576 |
| -4.01077 | -0.0155091 | -29.9584 |
| -4.03518 | -0.0148957 | -29.8592 |
| -4.05578 | -0.0146424 | -29.76   |
| -4.06265 | -0.0146058 | -29.6608 |
| -4.10461 | -0.0164491 | -29.5616 |
| -4.1275  | -0.0155824 | -29.4624 |
| -4.14734 | -0.0145661 | -29.3632 |
| -4.1687  | -0.0143647 | -29.264  |
| -4.18167 | -0.0141969 | -29.1648 |
| -4.20608 | -0.0143006 | -29.0656 |
| -4.24194 | -0.014145  | -28.9664 |
| -4.23507 | -0.0140626 | -28.8672 |
| -4.27017 | -0.0138093 | -28.768  |
| -4.28238 | -0.0138032 | -28.6688 |
| -4.30832 | -0.0135224 | -28.5696 |

|          |             |          |
|----------|-------------|----------|
| -4.33654 | -0.0136018  | -28.4704 |
| -4.35333 | -0.0134004  | -28.3712 |
| -4.36477 | -0.0133821  | -28.272  |
| -4.39224 | -0.0134248  | -28.1728 |
| -4.41284 | -0.013202   | -28.0736 |
| -4.41818 | -0.0130189  | -27.9744 |
| -4.44946 | -0.0130799  | -27.8752 |
| -4.45633 | -0.0128297  | -27.776  |
| -4.47616 | -0.0127992  | -27.6768 |
| -4.48608 | -0.0128022  | -27.5776 |
| -4.50515 | -0.0126069  | -27.4784 |
| -4.52652 | -0.0125245  | -27.3792 |
| -4.54483 | -0.012494   | -27.28   |
| -4.57229 | -0.0124452  | -27.1808 |
| -4.58374 | -0.0122438  | -27.0816 |
| -4.58831 | -0.0122255  | -26.9824 |
| -4.60205 | -0.0121522  | -26.8832 |
| -4.63104 | -0.0120729  | -26.784  |
| -4.65316 | -0.0131044  | -26.6848 |
| -4.66156 | -0.0119447  | -26.5856 |
| -4.68216 | -0.0119905  | -26.4864 |
| -4.70123 | -0.0118531  | -26.3872 |
| -4.71954 | -0.0117067  | -26.288  |
| -4.70962 | -0.0116456  | -26.1888 |
| -4.74014 | -0.011612   | -26.0896 |
| -4.74472 | -0.0114137  | -25.9904 |
| -4.77752 | -0.0113588  | -25.8912 |
| -4.79507 | -0.0112428  | -25.792  |
| -4.79889 | -0.0110994  | -25.6928 |
| -4.8172  | -0.0111085  | -25.5936 |
| -4.82483 | -0.0142182  | -25.4944 |
| -4.85534 | -0.0135926  | -25.3952 |
| -4.85305 | -0.0130738  | -25.296  |
| -4.88891 | -0.0108674  | -25.1968 |
| -4.88739 | -0.0108369  | -25.0976 |
| -4.89273 | -0.0107515  | -24.9984 |
| -4.90875 | -0.0107667  | -24.8992 |
| -4.93393 | -0.0106416  | -24.8    |
| -4.93011 | -0.010373   | -24.7008 |
| -4.94461 | -0.0103089  | -24.6016 |
| -4.97665 | -0.0102662  | -24.5024 |
| -4.99038 | -0.0101014  | -24.4032 |
| -5.00488 | -0.00994274 | -24.304  |
| -5.00412 | -0.00990917 | -24.2048 |

|          |             |          |
|----------|-------------|----------|
| -5.01785 | -0.00965892 | -24.1056 |
| -5.02853 | -0.00958568 | -24.0064 |
| -5.03616 | -0.00942394 | -23.9072 |
| -5.04989 | -0.00924388 | -23.808  |
| -5.06744 | -0.00914318 | -23.7088 |
| -5.06744 | -0.0091035  | -23.6096 |
| -5.07354 | -0.00901805 | -23.5104 |
| -5.07049 | -0.00552684 | -23.4112 |
| -5.04303 | -0.00291149 | -23.312  |
| -5.07049 | -0.0212648  | -23.2128 |
| -5.07202 | -0.013788   | -23.1136 |
| -5.03311 | -0.0128572  | -23.0144 |
| -5.03235 | -0.0181642  | -22.9152 |
| -5.00183 | -0.0152619  | -22.816  |
| -5.0148  | -0.0178529  | -22.7168 |
| -5.00717 | -0.0138612  | -22.6176 |
| -5.01861 | -0.0137269  | -22.5184 |
| -5.04074 | -0.013437   | -22.4192 |
| -5.05752 | -0.0122895  | -22.32   |
| -5.0827  | -0.0115907  | -22.2208 |
| -5.09338 | -0.010663   | -22.1216 |
| -5.10025 | -0.0102143  | -22.0224 |
| -5.12771 | -0.00945446 | -21.9232 |
| -5.13305 | -0.0113008  | -21.824  |
| -5.14068 | -0.0103669  | -21.7248 |
| -5.16357 | -0.00881053 | -21.6256 |
| -5.1712  | -0.00873424 | -21.5264 |
| -5.17807 | -0.0084901  | -21.4272 |
| -5.18341 | -0.00847484 | -21.328  |
| -5.20782 | -0.00846874 | -21.2288 |
| -5.20248 | -0.00842906 | -21.1296 |
| -5.20553 | -0.0106141  | -21.0304 |
| -5.23224 | -0.00950328 | -20.9312 |
| -5.22918 | -0.00826427 | -20.832  |
| -5.23681 | -0.00779125 | -20.7328 |
| -5.24521 | -0.00784618 | -20.6336 |
| -5.25741 | -0.00910961 | -20.5344 |
| -5.26428 | -0.00754711 | -20.4352 |
| -5.26046 | -0.00717479 | -20.336  |
| -5.26962 | -0.00702526 | -20.2368 |
| -5.27649 | -0.00680858 | -20.1376 |
| -5.28259 | -0.00668651 | -20.0384 |
| -5.28564 | -0.00647594 | -19.9392 |
| -5.29327 | -0.00632946 | -19.84   |

|          |             |          |
|----------|-------------|----------|
| -5.30471 | -0.00615245 | -19.7408 |
| -5.31997 | -0.00601512 | -19.6416 |
| -5.32379 | -0.00591136 | -19.5424 |
| -5.32379 | -0.00580455 | -19.4432 |
| -5.33065 | -0.00558788 | -19.344  |
| -5.31768 | -0.0052766  | -19.2448 |
| -5.32608 | -0.00523693 | -19.1456 |
| -5.336   | -0.00616771 | -19.0464 |
| -5.34744 | -0.00502635 | -18.9472 |
| -5.34973 | -0.00490428 | -18.848  |
| -5.34744 | -0.00463268 | -18.7488 |
| -5.33294 | -0.00443126 | -18.6496 |
| -5.34668 | -0.00430614 | -18.5504 |
| -5.34973 | -0.00400707 | -18.4512 |
| -5.35583 | -0.00393077 | -18.352  |
| -5.35431 | -0.00364391 | -18.2528 |
| -5.35659 | -0.00337535 | -18.1536 |
| -5.35965 | -0.00324108 | -18.0544 |
| -5.36041 | -0.00289623 | -17.9552 |
| -5.35507 | -0.00271007 | -17.856  |
| -5.35049 | -0.00238353 | -17.7568 |
| -5.36041 | -0.00403148 | -17.6576 |



**Table of supporting data for Figure S2b**

| <b>Applied Voltage (kV)</b> | <b>Charge (nC)</b> |
|-----------------------------|--------------------|
| -5.36804                    | -255.769           |
| -5.34897                    | -253.098           |
| -5.35888                    | -254.777           |
| -5.36346                    | -255.311           |
| -5.35965                    | -254.777           |
| -5.37872                    | -257.752           |
| -5.3894                     | -255.692           |
| -5.36575                    | -255.082           |
| -5.38864                    | -255.54            |
| -5.38864                    | -258.897           |
| -5.37796                    | -254.853           |
| -5.39016                    | -257.829           |
| -5.39398                    | -256.837           |
| -5.37796                    | -256.226           |
| -5.38788                    | -258.134           |
| -5.37872                    | -257.905           |
| -5.36956                    | -257.524           |
| -5.37262                    | -258.21            |
| -5.3833                     | -258.439           |
| -5.38177                    | -257.218           |
| -5.37872                    | -256.837           |
| -5.36728                    | -257.981           |
| -5.36422                    | -259.202           |
| -5.36728                    | -257.371           |
| -5.35202                    | -257.676           |
| -5.34286                    | -257.829           |
| -5.34362                    | -256.837           |
| -5.3482                     | -256.532           |
| -5.33905                    | -260.423           |
| -5.33752                    | -257.447           |
| -5.34057                    | -257.752           |
| -5.32684                    | -256.837           |
| -5.31845                    | -259.431           |
| -5.30853                    | -256.532           |
| -5.307                      | -258.744           |
| -5.29174                    | -255.158           |
| -5.29251                    | -256.074           |
| -5.29709                    | -257.524           |
| -5.27038                    | -255.845           |
| -5.28412                    | -257.524           |
| -5.27115                    | -255.311           |

|          |          |
|----------|----------|
| -5.25131 | -253.785 |
| -5.24673 | -255.235 |
| -5.25207 | -255.082 |
| -5.233   | -255.769 |
| -5.22232 | -255.082 |
| -5.20935 | -254.243 |
| -5.20401 | -252.87  |
| -5.20019 | -253.556 |
| -5.20172 | -252.87  |
| -5.18417 | -255.082 |
| -5.17654 | -253.633 |
| -5.15518 | -253.633 |
| -5.15442 | -252.336 |
| -5.13992 | -251.496 |
| -5.12466 | -252.564 |
| -5.13611 | -251.267 |
| -5.11932 | -251.191 |
| -5.0972  | -251.267 |
| -5.07812 | -251.878 |
| -5.08117 | -249.665 |
| -5.06363 | -249.894 |
| -5.05523 | -249.742 |
| -5.0476  | -248.597 |
| -5.03387 | -248.597 |
| -5.02166 | -249.131 |
| -5.01556 | -248.597 |
| -5.01098 | -246.156 |
| -4.98275 | -247.758 |
| -4.98123 | -247.071 |
| -4.95987 | -246.079 |
| -4.96139 | -245.24  |
| -4.92859 | -245.851 |
| -4.93622 | -245.088 |
| -4.9057  | -246.003 |
| -4.89731 | -244.325 |
| -4.88434 | -244.782 |
| -4.87289 | -243.409 |
| -4.85611 | -243.714 |
| -4.83627 | -240.357 |
| -4.83017 | -242.188 |
| -4.80728 | -239.747 |
| -4.80041 | -242.265 |
| -4.77218 | -239.823 |
| -4.77447 | -240.739 |

|          |          |
|----------|----------|
| -4.75845 | -238.755 |
| -4.72793 | -239.137 |
| -4.72259 | -237.306 |
| -4.71573 | -238.45  |
| -4.68368 | -236.237 |
| -4.67224 | -237     |
| -4.66766 | -236.161 |
| -4.65469 | -235.398 |
| -4.62799 | -233.109 |
| -4.60739 | -233.949 |
| -4.58984 | -234.254 |
| -4.58679 | -232.423 |
| -4.56237 | -232.27  |
| -4.53796 | -233.109 |
| -4.52499 | -232.194 |
| -4.51812 | -230.668 |
| -4.49447 | -229.905 |
| -4.47998 | -227.54  |
| -4.44946 | -229.676 |
| -4.43191 | -227.769 |
| -4.41665 | -226.472 |
| -4.40063 | -226.319 |
| -4.37622 | -224.488 |
| -4.3808  | -224.793 |
| -4.3457  | -224.336 |
| -4.32892 | -224.183 |
| -4.29001 | -221.513 |
| -4.29153 | -221.894 |
| -4.26101 | -221.284 |
| -4.23736 | -221.284 |
| -4.22287 | -219.834 |
| -4.18396 | -218.156 |
| -4.19235 | -218.614 |
| -4.15878 | -218.003 |
| -4.142   | -216.783 |
| -4.10537 | -216.477 |
| -4.08859 | -214.265 |
| -4.0596  | -212.51  |
| -4.05273 | -213.654 |
| -4.01306 | -212.663 |
| -3.99398 | -211.366 |
| -3.97567 | -211.366 |
| -3.96194 | -207.932 |
| -3.92532 | -209.687 |

|          |          |
|----------|----------|
| -3.91922 | -206.559 |
| -3.87726 | -205.949 |
| -3.87268 | -205.949 |
| -3.82995 | -206.788 |
| -3.80859 | -203.202 |
| -3.79257 | -205.186 |
| -3.78189 | -202.21  |
| -3.76281 | -200.15  |
| -3.72543 | -199.769 |
| -3.71246 | -198.777 |
| -3.68194 | -199.159 |
| -3.64837 | -198.091 |
| -3.64151 | -196.87  |
| -3.59802 | -195.191 |
| -3.57742 | -196.565 |
| -3.54614 | -195.725 |
| -3.53241 | -192.979 |
| -3.50799 | -189.698 |
| -3.479   | -189.393 |
| -3.4584  | -188.554 |
| -3.41568 | -187.333 |
| -3.40118 | -187.562 |
| -3.376   | -185.807 |
| -3.33481 | -184.892 |
| -3.31573 | -182.755 |
| -3.28216 | -182.603 |
| -3.25012 | -182.755 |
| -3.22113 | -180.009 |
| -3.20663 | -178.712 |
| -3.18069 | -178.407 |
| -3.15017 | -176.194 |
| -3.12576 | -175.508 |
| -3.10058 | -175.05  |
| -3.09524 | -174.592 |
| -3.06549 | -170.548 |
| -3.02429 | -172.456 |
| -2.99148 | -171.006 |
| -2.95944 | -169.785 |
| -2.93426 | -167.878 |
| -2.92663 | -167.268 |
| -2.89535 | -167.039 |
| -2.86789 | -164.216 |
| -2.83203 | -166.047 |
| -2.78778 | -165.513 |

|          |          |
|----------|----------|
| -2.78473 | -161.851 |
| -2.73971 | -160.935 |
| -2.71225 | -160.02  |
| -2.70462 | -158.341 |
| -2.66037 | -158.875 |
| -2.62451 | -155.061 |
| -2.6123  | -156.434 |
| -2.57797 | -153.382 |
| -2.55203 | -154.374 |
| -2.51999 | -151.475 |
| -2.49176 | -151.322 |
| -2.44674 | -149.72  |
| -2.42538 | -149.644 |
| -2.41012 | -148.957 |
| -2.35443 | -145.524 |
| -2.33307 | -145.219 |
| -2.2911  | -143.54  |
| -2.2705  | -143.388 |
| -2.23846 | -140.183 |
| -2.21252 | -140.183 |
| -2.18429 | -138.886 |
| -2.15377 | -136.292 |
| -2.12555 | -135.606 |
| -2.09045 | -134.309 |
| -2.06451 | -132.63  |
| -2.02484 | -132.707 |
| -1.99432 | -130.341 |
| -1.96151 | -128.663 |
| -1.93405 | -128.053 |
| -1.90353 | -126.145 |
| -1.88369 | -125.001 |
| -1.83563 | -124.009 |
| -1.81656 | -121.263 |
| -1.77688 | -121.339 |
| -1.74865 | -118.974 |
| -1.7334  | -119.966 |
| -1.68838 | -117.753 |
| -1.6571  | -116.456 |
| -1.62582 | -116.38  |
| -1.60141 | -114.549 |
| -1.55487 | -112.946 |
| -1.52511 | -113.481 |
| -1.50757 | -111.192 |
| -1.46637 | -109.513 |

|            |          |
|------------|----------|
| -1.43966   | -107.911 |
| -1.40762   | -108.293 |
| -1.38397   | -106.385 |
| -1.34582   | -105.164 |
| -1.31302   | -103.639 |
| -1.268     | -102.876 |
| -1.24664   | -100.282 |
| -1.22375   | -98.4506 |
| -1.20468   | -98.3743 |
| -1.17035   | -97.6114 |
| -1.12381   | -94.9411 |
| -1.10092   | -94.407  |
| -1.06506   | -92.1182 |
| -1.0292    | -91.1264 |
| -0.993344  | -88.6087 |
| -0.978848  | -89.0665 |
| -0.946042  | -86.0147 |
| -0.91171   | -84.8703 |
| -0.889584  | -84.6414 |
| -0.83923   | -82.3526 |
| -0.802609  | -78.6142 |
| -0.775143  | -79.9112 |
| -0.7431    | -77.2409 |
| -0.70419   | -77.9276 |
| -0.685117  | -75.5624 |
| -0.637814  | -74.9521 |
| -0.602719  | -72.587  |
| -0.577542  | -72.2818 |
| -0.559995  | -70.527  |
| -0.518796  | -67.5516 |
| -0.503537  | -67.3227 |
| -0.453183  | -64.9576 |
| -0.421902  | -63.8895 |
| -0.386044  | -63.3554 |
| -0.365445  | -62.9739 |
| -0.338742  | -59.9222 |
| -0.313565  | -60.8377 |
| -0.277707  | -57.3282 |
| -0.220486  | -55.9549 |
| -0.205991  | -53.895  |
| -0.1564    | -53.7424 |
| -0.128934  | -52.5217 |
| -0.10452   | -52.9031 |
| -0.0701874 | -49.3936 |

|             |           |
|-------------|-----------|
| -0.037381   | -48.4018  |
| -0.00991516 | -46.7233  |
| 0.0251801   | -43.5953  |
| 0.0610382   | -43.2901  |
| 0.0968964   | -43.4427  |
| 0.131992    | -41.3828  |
| 0.156406    | -40.6961  |
| 0.209048    | -39.2465  |
| 0.218204    | -36.4236  |
| 0.246432    | -36.2711  |
| 0.28992     | -35.6607  |
| 0.313571    | -32.2275  |
| 0.344089    | -32.0749  |
| 0.38605     | -31.0068  |
| 0.424197    | -27.1921  |
| 0.454715    | -26.8869  |
| 0.479892    | -27.6498  |
| 0.516513    | -24.6744  |
| 0.550082    | -22.0804  |
| 0.5806      | -21.8515  |
| 0.620273    | -19.4101  |
| 0.662997    | -17.5027  |
| 0.690463    | -17.3502  |
| 0.718692    | -14.8325  |
| 0.751498    | -13.9169  |
| 0.782016    | -12.7725  |
| 0.824741    | -10.8652  |
| 0.842288    | -10.9415  |
| 0.891116    | -8.65265  |
| 0.920108    | -7.58453  |
| 0.95444     | -6.13495  |
| 0.986484    | -3.99872  |
| 1.00632     | -3.61725  |
| 1.05744     | 0.731506  |
| 1.08338     | -0.412903 |
| 1.10855     | 5.61432   |
| 1.15357     | 3.47809   |
| 1.17569     | 4.16473   |
| 1.22986     | 37.5052   |
| 1.24817     | -17.2739  |
| 1.25962     | 10.3445   |
| 1.31531     | 13.7015   |
| 1.34049     | 14.6933   |
| 1.38092     | 14.0067   |

|         |         |
|---------|---------|
| 1.39771 | 18.0502 |
| 1.43204 | 15.3036 |
| 1.46866 | 26.2137 |
| 1.50223 | 23.8486 |
| 1.51444 | 26.4426 |
| 1.55487 | 24.3063 |
| 1.58081 | 25.9085 |
| 1.60446 | 29.0366 |
| 1.64414 | 29.5706 |
| 1.67618 | 31.1728 |
| 1.71204 | 33.9194 |
| 1.74408 | 34.2245 |
| 1.79673 | 47.1182 |
| 1.80741 | 38.8785 |
| 1.84937 | 31.5543 |
| 1.87912 | 45.5161 |
| 1.89743 | 45.6686 |
| 1.91422 | 45.7449 |
| 1.95008 | 48.11   |
| 1.99967 | 49.407  |
| 2.01798 | 51.9247 |
| 2.0401  | 53.298  |
| 2.09275 | 53.3743 |
| 2.12632 | 55.7394 |
| 2.15302 | 55.7394 |
| 2.16828 | 59.1727 |
| 2.21711 | 60.6985 |
| 2.2461  | 59.6304 |
| 2.2789  | 60.3934 |
| 2.30484 | 62.9874 |
| 2.34223 | 65.5051 |
| 2.37656 | 66.5732 |
| 2.40555 | 68.5568 |
| 2.4292  | 68.1754 |
| 2.45133 | 115.02  |
| 2.4849  | 40.2518 |
| 2.51007 | 69.1672 |
| 2.53907 | 79.6194 |
| 2.56195 | 79.9246 |
| 2.57645 | 79.5432 |
| 2.61078 | 82.4423 |
| 2.63672 | 83.0527 |
| 2.66648 | 86.257  |
| 2.69089 | 85.9518 |



|         |         |
|---------|---------|
| 2.72599 | 89.7665 |
| 2.75421 | 87.7829 |
| 2.78931 | 91.9791 |
| 2.81449 | 93.0472 |
| 2.84653 | 95.4123 |
| 2.88086 | 95.4123 |
| 2.90528 | 97.1671 |
| 2.94419 | 99.227  |
| 2.97699 | 103.118 |
| 2.99759 | 100.677 |
| 3.02353 | 102.202 |
| 3.04947 | 102.889 |
| 3.0838  | 104.72  |
| 3.10364 | 104.72  |
| 3.14102 | 114.715 |
| 3.15247 | 107.619 |
| 3.17841 | 108.23  |
| 3.21122 | 116.088 |
| 3.23181 | 116.012 |
| 3.25775 | 116.393 |
| 3.27454 | 117.232 |
| 3.28446 | 118.682 |
| 3.32184 | 122.802 |
| 3.3577  | 122.878 |
| 3.37448 | 124.557 |
| 3.40271 | 125.014 |
| 3.4317  | 126.845 |
| 3.45612 | 127.379 |
| 3.48587 | 131.347 |
| 3.51639 | 129.134 |
| 3.54538 | 132.873 |
| 3.56598 | 133.178 |
| 3.58811 | 134.856 |
| 3.60871 | 136.23  |
| 3.6438  | 137.45  |
| 3.67813 | 137.298 |
| 3.69263 | 137.755 |
| 3.72238 | 139.586 |
| 3.73688 | 141.875 |
| 3.75519 | 142.409 |
| 3.77808 | 145.156 |
| 3.80783 | 145.385 |
| 3.83454 | 148.513 |
| 3.85895 | 146.529 |

|         |         |
|---------|---------|
| 3.88947 | 152.099 |
| 3.90625 | 150.268 |
| 3.91846 | 153.091 |
| 3.94516 | 179.565 |
| 3.965   | 127.914 |
| 3.99704 | 157.516 |
| 4.01688 | 160.72  |
| 4.02298 | 161.559 |
| 4.05579 | 161.483 |
| 4.07334 | 163.314 |
| 4.10157 | 164.992 |
| 4.12369 | 166.823 |
| 4.13132 | 165.145 |
| 4.1565  | 168.96  |
| 4.1771  | 167.129 |
| 4.19159 | 171.096 |
| 4.21448 | 171.477 |
| 4.24652 | 172.317 |
| 4.26636 | 174.911 |
| 4.28315 | 174.071 |
| 4.32282 | 173.461 |
| 4.32968 | 178.039 |
| 4.33655 | 179.183 |
| 4.37775 | 179.717 |
| 4.38614 | 180.556 |
| 4.41284 | 181.09  |
| 4.43726 | 181.014 |
| 4.44565 | 183.456 |
| 4.4838  | 184.524 |
| 4.5044  | 185.897 |
| 4.5166  | 187.957 |
| 4.52576 | 187.499 |
| 4.55475 | 186.66  |
| 4.56772 | 188.109 |
| 4.5929  | 215.575 |
| 4.5929  | 180.404 |
| 4.62647 | 188.796 |
| 4.64249 | 198.409 |
| 4.64478 | 198.943 |
| 4.65012 | 197.57  |
| 4.67377 | 201.308 |
| 4.6875  | 201.766 |
| 4.7081  | 201.613 |
| 4.71192 | 203.368 |

|         |         |
|---------|---------|
| 4.73786 | 202.987 |
| 4.75769 | 204.513 |
| 4.77066 | 203.597 |
| 4.78592 | 206.496 |
| 4.805   | 206.878 |
| 4.8172  | 208.175 |
| 4.84925 | 208.098 |
| 4.84925 | 210.158 |
| 4.8584  | 209.319 |
| 4.89426 | 211.989 |
| 4.88739 | 212.142 |
| 4.9141  | 213.21  |
| 4.93164 | 212.066 |
| 4.95911 | 215.423 |
| 4.96216 | 215.194 |
| 4.97284 | 217.33  |
| 4.99192 | 217.635 |
| 5.01023 | 218.322 |
| 5.00641 | 218.398 |
| 5.03998 | 220.229 |
| 5.05448 | 221.297 |
| 5.0705  | 224.196 |
| 5.06134 | 218.093 |
| 5.08499 | 222.976 |
| 5.0911  | 222.899 |
| 5.10559 | 224.12  |
| 5.12619 | 224.349 |
| 5.12314 | 225.799 |
| 5.16053 | 224.502 |
| 5.15213 | 227.706 |
| 5.17121 | 227.935 |
| 5.1735  | 226.256 |
| 5.19715 | 231.292 |
| 5.2002  | 226.028 |
| 5.21317 | 228.698 |
| 5.20935 | 229.69  |
| 5.21393 | 231.902 |
| 5.23835 | 231.292 |
| 5.25132 | 234.801 |
| 5.24063 | 234.038 |
| 5.26276 | 234.115 |
| 5.26657 | 233.657 |
| 5.27802 | 234.649 |
| 5.27802 | 236.251 |

|         |         |
|---------|---------|
| 5.30625 | 237.395 |
| 5.29251 | 237.472 |
| 5.31464 | 236.175 |
| 5.32227 | 238.235 |
| 5.31845 | 238.616 |
| 5.33676 | 238.845 |
| 5.336   | 241.057 |
| 5.34134 | 239.532 |
| 5.3627  | 240.981 |
| 5.35736 | 241.897 |
| 5.36042 | 241.134 |
| 5.36118 | 243.651 |
| 5.35965 | 244.872 |
| 5.35736 | 242.583 |
| 5.37491 | 242.126 |
| 5.36118 | 244.033 |
| 5.37339 | 245.33  |
| 5.38788 | 243.423 |
| 5.3917  | 245.177 |
| 5.38559 | 247.466 |
| 5.39856 | 247.466 |
| 5.39475 | 247.619 |
| 5.40314 | 246.093 |
| 5.40848 | 247.237 |
| 5.4123  | 246.856 |
| 5.41687 | 248.153 |
| 5.41077 | 248.611 |
| 5.41001 | 249.221 |
| 5.41916 | 248.305 |
| 5.41687 | 250.67  |
| 5.40924 | 248.687 |
| 5.41306 | 250.67  |
| 5.42679 | 250.976 |
| 5.42527 | 249.145 |
| 5.42145 | 249.984 |
| 5.43213 | 250.136 |
| 5.4184  | 249.755 |
| 5.43366 | 250.136 |
| 5.42679 | 252.12  |
| 5.43976 | 250.594 |
| 5.43061 | 252.12  |
| 5.41764 | 250.976 |
| 5.41992 | 252.502 |
| 5.42298 | 250.518 |

|         |         |
|---------|---------|
| 5.41153 | 251.967 |
| 5.41916 | 251.586 |
| 5.4123  | 253.57  |
| 5.41306 | 252.12  |
| 5.42374 | 250.976 |
| 5.41382 | 251.51  |
| 5.39398 | 250.747 |
| 5.40467 | 253.646 |
| 5.39627 | 250.289 |
| 5.39627 | 250.823 |
| 5.38483 | 251.205 |
| 5.38559 | 251.891 |
| 5.3833  | 251.052 |
| 5.37491 | 252.578 |
| 5.36423 | 250.823 |
| 5.37339 | 251.815 |
| 5.34592 | 252.425 |
| 5.33982 | 251.967 |
| 5.33982 | 251.51  |
| 5.32608 | 250.213 |
| 5.3154  | 250.823 |
| 5.31845 | 250.213 |
| 5.32074 | 250.289 |
| 5.3154  | 248.992 |
| 5.3032  | 250.136 |
| 5.29175 | 249.908 |
| 5.30625 | 250.136 |
| 5.26963 | 248.382 |
| 5.26581 | 249.145 |
| 5.25437 | 248     |
| 5.23606 | 248.992 |
| 5.23529 | 248.611 |
| 5.22461 | 248.458 |
| 5.19944 | 247.924 |
| 5.20401 | 247.619 |
| 5.18799 | 247.695 |
| 5.19028 | 247.771 |
| 5.16663 | 248     |
| 5.15366 | 247.695 |
| 5.15747 | 246.169 |
| 5.1384  | 246.398 |
| 5.12467 | 245.101 |
| 5.11246 | 244.948 |
| 5.09339 | 244.948 |

|         |         |
|---------|---------|
| 5.07965 | 243.27  |
| 5.06668 | 244.262 |
| 5.06134 | 244.72  |
| 5.03617 | 243.27  |
| 5.03311 | 242.431 |
| 5.02396 | 241.21  |
| 5.0026  | 242.736 |
| 4.97971 | 241.21  |
| 4.97742 | 240.218 |
| 4.97284 | 241.668 |
| 4.94919 | 239.532 |
| 4.93088 | 239.532 |
| 4.93012 | 239.226 |
| 4.9141  | 238.769 |
| 4.88816 | 238.158 |
| 4.8935  | 238.616 |
| 4.86374 | 236.861 |
| 4.85306 | 236.251 |
| 4.83094 | 235.488 |
| 4.81568 | 233.428 |
| 4.80347 | 235.564 |
| 4.7699  | 234.344 |
| 4.76532 | 231.978 |
| 4.75617 | 232.894 |
| 4.72794 | 232.055 |
| 4.73709 | 233.428 |
| 4.71268 | 230.681 |
| 4.68293 | 231.673 |
| 4.68064 | 232.36  |
| 4.64783 | 229.613 |
| 4.63715 | 229.69  |
| 4.62723 | 228.622 |
| 4.59671 | 226.256 |
| 4.59824 | 226.333 |
| 4.56772 | 224.959 |
| 4.54026 | 224.959 |
| 4.53644 | 225.112 |
| 4.50821 | 223.205 |
| 4.50592 | 223.662 |
| 4.48151 | 222.213 |
| 4.45252 | 220.763 |
| 4.42887 | 222.365 |
| 4.42429 | 221.068 |
| 4.41437 | 220.229 |

|         |         |
|---------|---------|
| 4.39759 | 219.085 |
| 4.36783 | 218.703 |
| 4.33731 | 216.872 |
| 4.319   | 217.635 |
| 4.30451 | 215.27  |
| 4.28315 | 217.254 |
| 4.26636 | 212.981 |
| 4.24347 | 213.134 |
| 4.22287 | 214.202 |
| 4.20456 | 211.761 |
| 4.17786 | 212.829 |
| 4.1771  | 209.395 |
| 4.15345 | 210.006 |
| 4.12064 | 208.251 |
| 4.11148 | 207.641 |
| 4.09317 | 205.047 |
| 4.06494 | 204.284 |
| 4.03061 | 204.589 |
| 4.02222 | 206.344 |
| 3.99475 | 205.123 |
| 3.9856  | 203.597 |
| 3.96118 | 202.529 |
| 3.93601 | 202.224 |
| 3.9177  | 200.24  |
| 3.88336 | 198.867 |
| 3.87268 | 198.867 |
| 3.84369 | 197.722 |
| 3.82233 | 197.265 |
| 3.79181 | 195.815 |
| 3.77503 | 195.128 |
| 3.74985 | 192.916 |
| 3.72925 | 193.526 |
| 3.72391 | 190.932 |
| 3.70255 | 190.169 |
| 3.66364 | 190.856 |
| 3.64838 | 188.796 |
| 3.60871 | 188.262 |
| 3.57743 | 187.804 |
| 3.56369 | 187.728 |
| 3.54004 | 184.752 |
| 3.51715 | 184.524 |
| 3.49045 | 183.15  |
| 3.46527 | 182.159 |
| 3.44162 | 181.93  |

|         |         |
|---------|---------|
| 3.4195  | 180.709 |
| 3.39814 | 177.886 |
| 3.35617 | 177.962 |
| 3.33329 | 176.284 |
| 3.32108 | 176.131 |
| 3.28369 | 175.216 |
| 3.26767 | 173.156 |
| 3.23334 | 173.003 |
| 3.20282 | 170.638 |
| 3.18451 | 171.401 |
| 3.15171 | 170.257 |
| 3.12119 | 168.273 |
| 3.09525 | 166.595 |
| 3.08075 | 164.382 |
| 3.05634 | 164.229 |
| 3.02506 | 165.221 |
| 2.98081 | 162.169 |
| 2.96555 | 161.483 |
| 2.9213  | 159.804 |
| 2.89231 | 158.66  |
| 2.87018 | 157.287 |
| 2.84882 | 156.295 |
| 2.80915 | 155.15  |
| 2.77634 | 154.159 |
| 2.74735 | 152.328 |
| 2.73133 | 150.954 |
| 2.69852 | 150.344 |
| 2.6619  | 149.428 |
| 2.64893 | 146.224 |
| 2.61383 | 146.606 |
| 2.57492 | 145.843 |
| 2.55432 | 146.224 |
| 2.53144 | 142.867 |
| 2.50168 | 141.341 |
| 2.4704  | 141.723 |
| 2.42157 | 140.273 |
| 2.42157 | 138.366 |
| 2.37885 | 137.374 |
| 2.35367 | 133.636 |
| 2.32163 | 133.33  |
| 2.2934  | 134.017 |
| 2.23923 | 132.033 |
| 2.21787 | 131.118 |
| 2.1843  | 131.957 |



|          |         |
|----------|---------|
| 2.16523  | 128.066 |
| 2.12021  | 127.837 |
| 2.10648  | 125.548 |
| 2.05765  | 125.548 |
| 2.03629  | 123.26  |
| 2.01645  | 122.954 |
| 1.98746  | 121.963 |
| 1.94702  | 119.674 |
| 1.92108  | 117.538 |
| 1.89286  | 116.317 |
| 1.86081  | 115.554 |
| 1.84098  | 114.715 |
| 1.78986  | 113.418 |
| 1.75705  | 111.358 |
| 1.7334   | 110.366 |
| 1.69144  | 109.832 |
| 1.66092  | 106.246 |
| 1.62049  | 106.322 |
| 1.60599  | 105.865 |
| 1.57852  | 102.889 |
| 1.5564   | 102.355 |
| 1.51596  | 103.576 |
| 1.49384  | 99.3033 |
| 1.45569  | 100.143 |
| 1.42365  | 96.8619 |
| 1.38016  | 96.2515 |
| 1.34888  | 93.9627 |
| 1.32065  | 93.5812 |
| 1.29242  | 91.3687 |
| 1.26267  | 90.9109 |
| 1.23291  | 88.851  |
| 1.18637  | 88.3932 |
| 1.15815  | 87.0963 |
| 1.12992  | 83.8156 |
| 1.09864  | 82.0609 |
| 1.06659  | 82.366  |
| 1.04447  | 81.6794 |
| 1.01166  | 79.6957 |
| 0.977328 | 78.6276 |
| 0.955966 | 78.1699 |
| 0.906375 | 76.8729 |
| 0.870517 | 75.1181 |
| 0.833896 | 72.0663 |
| 0.805667 | 71.9901 |

|             |         |
|-------------|---------|
| 0.77515     | 71.3797 |
| 0.74921     | 70.3116 |
| 0.706485    | 67.1072 |
| 0.660709    | 66.3443 |
| 0.660709    | 64.1318 |
| 0.604251    | 63.5214 |
| 0.578311    | 62.8348 |
| 0.550845    | 59.4016 |
| 0.494388    | 59.0201 |
| 0.481418    | 58.8675 |
| 0.442508    | 56.8839 |
| 0.405887    | 54.7476 |
| 0.376895    | 54.1373 |
| 0.349429    | 51.8484 |
| 0.321964    | 51.6196 |
| 0.280002    | 48.4152 |
| 0.238803    | 47.9575 |
| 0.222018    | 47.1945 |
| 0.194553    | 45.9738 |
| 0.157169    | 44.1428 |
| 0.109103    | 43.0746 |
| 0.0839264   | 37.1237 |
| 0.0518829   | 41.3199 |
| 0.00534363  | 38.6496 |
| -0.00991516 | 35.903  |
| -0.0633209  | 36.1319 |
| -0.0961273  | 34.9112 |
| -0.125119   | 31.4017 |
| -0.148007   | 31.8594 |
| -0.199887   | 30.5624 |
| -0.211331   | 28.3499 |
| -0.256345   | 28.3499 |
| -0.289914   | 25.2219 |
| -0.318906   | 24.6115 |
| -0.34866    | 23.6197 |
| -0.384518   | 21.102  |
| -0.414273   | 21.4072 |
| -0.447842   | 18.0502 |
| -0.473782   | 17.9739 |
| -0.498196   | 16.6769 |
| -0.534055   | 14.617  |
| -0.58212    | 13.1674 |
| -0.611111   | 12.6334 |
| -0.638577   | 12.7097 |

|           |          |
|-----------|----------|
| -0.675198 | 9.27643  |
| -0.710294 | 9.20013  |
| -0.740811 | 6.75873  |
| -0.779721 | 6.75873  |
| -0.811765 | 3.40179  |
| -0.83389  | 1.95221  |
| -0.868985 | 1.11298  |
| -0.897214 | -1.25214 |
| -0.931546 | -2.70172 |
| -0.953671 | -4.45648 |
| -0.991055 | -6.05865 |
| -1.017    | -8.11859 |
| -1.05362  | -9.72076 |
| -1.07879  | -7.50824 |
| -1.12075  | -11.4755 |
| -1.1383   | -12.9251 |
| -1.18713  | -15.3665 |
| -1.20468  | -15.6717 |
| -1.25274  | -17.8079 |
| -1.27868  | -18.876  |
| -1.31225  | -19.9442 |
| -1.33972  | -20.173  |
| -1.371    | -21.6989 |
| -1.40533  | -23.8351 |
| -1.43127  | -26.0477 |
| -1.45416  | -26.4291 |
| -1.49765  | -28.7943 |
| -1.53961  | -29.4809 |
| -1.55182  | -30.6253 |
| -1.6098   | -32.0749 |
| -1.63269  | -35.2029 |
| -1.66855  | -35.3555 |
| -1.70364  | -36.4999 |
| -1.72882  | -38.331  |
| -1.7601   | -39.3228 |
| -1.77765  | -40.4672 |
| -1.81884  | -42.222  |
| -1.83868  | -43.9767 |
| -1.86844  | -43.7479 |
| -1.89972  | -47.1811 |
| -1.91726  | -47.3337 |
| -1.96533  | -49.1647 |
| -2.01721  | -49.8514 |
| -2.03018  | -52.2165 |

|          |          |
|----------|----------|
| -2.07214 | -52.9031 |
| -2.09121 | -54.0475 |
| -2.12402 | -55.726  |
| -2.16369 | -56.6415 |
| -2.1904  | -58.2437 |
| -2.21328 | -60.3036 |
| -2.25143 | -58.32   |
| -2.28271 | -63.2791 |
| -2.30407 | -64.2709 |
| -2.31857 | -65.9494 |
| -2.38189 | -66.4835 |
| -2.39334 | -69.1537 |
| -2.42004 | -69.5352 |
| -2.45666 | -70.2982 |
| -2.48489 | -73.1973 |
| -2.51083 | -72.3581 |
| -2.55737 | -73.9603 |
| -2.56576 | -75.4861 |
| -2.60086 | -76.3254 |
| -2.6268  | -78.6905 |
| -2.66418 | -80.5215 |
| -2.69775 | -75.5624 |
| -2.72369 | -93.7204 |
| -2.75192 | -83.497  |
| -2.7771  | -87.8458 |
| -2.79922 | -91.0501 |
| -2.81295 | -89.8294 |
| -2.85949 | -92.1182 |
| -2.88543 | -92.0419 |
| -2.90603 | -99.2899 |
| -2.94265 | -94.2545 |
| -2.96707 | -96.2381 |
| -2.98767 | -97.9166 |
| -3.00445 | -100.434 |
| -3.02887 | -101.96  |
| -3.05481 | -105.546 |
| -3.09524 | -103.257 |
| -3.11584 | -105.47  |
| -3.14407 | -107.53  |
| -3.17306 | -111.192 |
| -3.20053 | -109.895 |
| -3.23257 | -111.115 |
| -3.26385 | -111.573 |
| -3.27682 | -112.87  |

|          |          |
|----------|----------|
| -3.30658 | -113.099 |
| -3.34015 | -116.609 |
| -3.36303 | -117.219 |
| -3.37677 | -117.372 |
| -3.40423 | -119.737 |
| -3.44925 | -120.957 |
| -3.47366 | -120.042 |
| -3.48892 | -121.873 |
| -3.54232 | -123.322 |
| -3.53546 | -126.298 |
| -3.56979 | -125.993 |
| -3.58276 | -126.679 |
| -3.61786 | -129.807 |
| -3.64761 | -129.655 |
| -3.66592 | -130.418 |
| -3.68576 | -131.41  |
| -3.7178  | -132.935 |
| -3.73687 | -136.598 |
| -3.759   | -144.303 |
| -3.77731 | -134.385 |
| -3.80249 | -136.369 |
| -3.82614 | -141.557 |
| -3.84369 | -140.717 |
| -3.87191 | -143.769 |
| -3.89099 | -145.143 |
| -3.91006 | -146.44  |
| -3.94592 | -146.363 |
| -3.96347 | -147.126 |
| -3.9833  | -147.66  |
| -4.01077 | -150.102 |
| -4.03518 | -150.331 |
| -4.05578 | -153.382 |
| -4.06265 | -153.764 |
| -4.10461 | -154.374 |
| -4.1275  | -154.832 |
| -4.14734 | -157.273 |
| -4.1687  | -157.655 |
| -4.18167 | -158.799 |
| -4.20608 | -157.807 |
| -4.24194 | -161.622 |
| -4.23507 | -161.012 |
| -4.27017 | -163.835 |
| -4.28238 | -163.682 |
| -4.30832 | -165.132 |

|          |          |
|----------|----------|
| -4.33654 | -165.055 |
| -4.35333 | -164.674 |
| -4.36477 | -167.191 |
| -4.39224 | -168.488 |
| -4.41284 | -168.336 |
| -4.41818 | -169.557 |
| -4.44946 | -171.464 |
| -4.45633 | -171.311 |
| -4.47616 | -171.311 |
| -4.48608 | -174.134 |
| -4.50515 | -174.439 |
| -4.52652 | -174.516 |
| -4.54483 | -177.11  |
| -4.57229 | -176.652 |
| -4.58374 | -175.736 |
| -4.58831 | -178.407 |
| -4.60205 | -180.085 |
| -4.63104 | -180.39  |
| -4.65316 | -180.314 |
| -4.66156 | -181.992 |
| -4.68216 | -183.289 |
| -4.70123 | -182.527 |
| -4.71954 | -183.747 |
| -4.70962 | -185.349 |
| -4.74014 | -184.968 |
| -4.74472 | -185.96  |
| -4.77752 | -186.189 |
| -4.79507 | -189.469 |
| -4.79889 | -189.774 |
| -4.8172  | -189.546 |
| -4.82483 | -190.537 |
| -4.85534 | -199.311 |
| -4.85305 | -188.477 |
| -4.88891 | -191.758 |
| -4.88739 | -194.886 |
| -4.89273 | -194.657 |
| -4.90875 | -194.657 |
| -4.93393 | -196.946 |
| -4.93011 | -196.87  |
| -4.94461 | -197.938 |
| -4.97665 | -199.235 |
| -4.99038 | -200.074 |
| -5.00488 | -202.821 |
| -5.00412 | -199.998 |

|          |          |
|----------|----------|
| -5.01785 | -201.524 |
| -5.02853 | -204.576 |
| -5.03616 | -205.567 |
| -5.04989 | -205.72  |
| -5.06744 | -205.873 |
| -5.06744 | -205.262 |
| -5.07354 | -205.186 |
| -5.07049 | -131.104 |
| -5.04303 | -310.395 |
| -5.07049 | -224.336 |
| -5.07202 | -228.761 |
| -5.03311 | -250.504 |
| -5.03235 | -223.573 |
| -5.00183 | -237.84  |
| -5.0148  | -232.499 |
| -5.00717 | -236.085 |
| -5.01861 | -233.949 |
| -5.04074 | -240.281 |
| -5.05752 | -236.848 |
| -5.0827  | -239.442 |
| -5.09338 | -239.137 |
| -5.10025 | -237.992 |
| -5.12771 | -241.12  |
| -5.13305 | -248.368 |
| -5.14068 | -238.755 |
| -5.16357 | -241.578 |
| -5.1712  | -245.393 |
| -5.17807 | -245.622 |
| -5.18341 | -244.554 |
| -5.20782 | -245.469 |
| -5.20248 | -246.308 |
| -5.20553 | -247.529 |
| -5.23224 | -249.589 |
| -5.22918 | -248.445 |
| -5.23681 | -247.987 |
| -5.24521 | -250.047 |
| -5.25741 | -250.276 |
| -5.26428 | -251.191 |
| -5.26046 | -252.259 |
| -5.26962 | -252.336 |
| -5.27649 | -252.717 |
| -5.28259 | -254.929 |
| -5.28564 | -253.098 |
| -5.29327 | -254.472 |

|          |          |
|----------|----------|
| -5.30471 | -254.09  |
| -5.31997 | -254.167 |
| -5.32379 | -254.395 |
| -5.32379 | -255.845 |
| -5.33065 | -254.777 |
| -5.31768 | -254.701 |
| -5.32608 | -256.15  |
| -5.336   | -257.295 |
| -5.34744 | -256.684 |
| -5.34973 | -257.218 |
| -5.34744 | -257.524 |
| -5.33294 | -256.532 |
| -5.34668 | -257.6   |
| -5.34973 | -258.363 |
| -5.35583 | -258.592 |
| -5.35431 | -259.583 |
| -5.35659 | -258.82  |
| -5.35965 | -259.431 |
| -5.36041 | -259.812 |
| -5.35507 | -259.66  |
| -5.35049 | -260.957 |
| -5.36041 | -259.965 |
